# Supplementary material
Source: publisher figshare collection journal article supplement (https://diabetesjournals.figshare.com/ndownloader/files/34833348)
Supplement: Supplementary file 1 [file 34833348]

## Sheet: filtered
ID	ScanNum	FragMethod	Precursor	IsotopeError	PrecursorError(ppm)	Charge	pre	Peptide	post	Protein	DeNovoScore	MSGFScore	SpecEValue	EValue	QValue	PepQValue
1	36227	HCD	1061.88	0	1.49444	3	R	TTGIVMDSGDGVTHTVPIYEGYALPHAILR	L	sp|P60710|ACTB_MOUSE	280	260	2.76981e-32	5.42098e-25	0	0
2	37549	HCD	877.2	1	-5.54992	4	R	MGYAEEAPYDAIHVGAAAPVVPQALIDQLKPGGR	L	sp|P23506|PIMT_MOUSE	217	188	4.04808e-30	7.96511e-23	0	0
3	32175	HCD	951.146	0	1.09089	3	K	TTAPSVYPLAPVC+57.021GDTTGSSVTLGC+57.021LVK	G	sp|P01865|GCAM_MOUSE	180	168	5.96072e-30	1.16333e-22	0	0
4	31950	HCD	951.48	1	0.150468	3	K	TTAPSVYPLAPVC+57.021GDTTGSSVTLGC+57.021LVK	G	sp|P01865|GCAM_MOUSE	186	174	1.3033e-29	2.5436e-22	0	0
5	32405	HCD	951.146	0	0.385021	3	K	TTAPSVYPLAPVC+57.021GDTTGSSVTLGC+57.021LVK	G	sp|P01865|GCAM_MOUSE	206	193	2.1106e-29	4.11917e-22	0	0
6	33880	HCD	727.33	1	-4.17556	4	K	SNWEAGNTFTC+57.021SVLHEGLHNHHTEK	S	sp|P01869|IGH1M_MOUSE	153	144	2.18448e-29	4.24431e-22	0	0
7	32108	HCD	1426.21	0	0.0855904	2	K	TTAPSVYPLAPVC+57.021GDTTGSSVTLGC+57.021LVK	G	sp|P01865|GCAM_MOUSE	182	164	7.22474e-29	1.41002e-21	0	0
8	36491	HCD	1061.88	0	2.4141	3	R	TTGIVMDSGDGVTHTVPIYEGYALPHAILR	L	sp|P60710|ACTB_MOUSE	258	220	1.68209e-28	3.29212e-21	0	0
9	32337	HCD	1426.22	0	0.427952	2	K	TTAPSVYPLAPVC+57.021GDTTGSSVTLGC+57.021LVK	G	sp|P01865|GCAM_MOUSE	199	178	2.28928e-28	4.4679e-21	0	0
10	4016	HCD	820.735	0	-2.08226	3	R	SSAGTGLSSGKRPSQEEDAQSVGPK	V	sp|P97784|CRY1_MOUSE	237	228	3.17277e-28	6.1645e-21	0	0
11	3122	HCD	736.337	0	-2.98404	3	R	NSYSC+57.021SVVHEGLHNHHTTK	S	sp|P01865|GCAM_MOUSE	192	192	8.68085e-27	1.66925e-19	0	0
12	3211	HCD	552.505	0	-1.98845	4	R	NSYSC+57.021SVVHEGLHNHHTTK	S	sp|P01865|GCAM_MOUSE	146	146	8.68085e-27	1.66925e-19	0	0
13	24446	HCD	762.723	0	0.400113	3	K	AGASIVGVNC+57.021HFDPSVSLQTVK	L	sp|O35490|BHMT1_MOUSE	191	188	1.37252e-26	2.65374e-19	0	0
14	29756	HCD	945.802	0	0.0645327	3	K	TTPPSVYPLAPGC+57.021GDTTGSSVTLGC+57.021LVK	G	sp|P01867|IGG2B_MOUSE	209	183	1.58489e-26	3.09317e-19	0	0
15	3315	HCD	736.34	0	-0.33156	3	R	NSYSC+57.021SVVHEGLHNHHTTK	S	sp|P01865|GCAM_MOUSE	208	208	2.53698e-26	4.87839e-19	0	0
16	3428	HCD	552.507	0	1.4361	4	R	NSYSC+57.021SVVHEGLHNHHTTK	S	sp|P01865|GCAM_MOUSE	160	160	2.53698e-26	4.87839e-19	0	0
17	15574	HCD	1281.12	1	-7.50568	2	K	LVQDVANNTNEEAGDGTTTATVLAR	S	sp|P63038|CH60_MOUSE	227	209	5.05655e-26	9.82457e-19	0	0
18	4410	HCD	541.015	0	1.57943	4	R	HNSYTC+57.021EATHKTSTSPIVK	S	sp|P01837|IGKC_MOUSE	189	189	6.8609e-26	1.31929e-18	0	0
19	37505	HCD	961.503	0	2.66612	4	K	KGSITSVQAIYVPADDLTDPAPATTFAHLDATTVLSR	A	sp|P56480|ATPB_MOUSE	201	144	9.09233e-26	1.79582e-18	0	0
20	5432	HCD	552.753	1	-8.58806	4	R	NSYSC+57.021SVVHEGLHNHHTTK	S	sp|P01865|GCAM_MOUSE	149	142	1.38703e-25	2.66713e-18	0	0
21	6112	HCD	541.26	1	-8.88331	4	R	HNSYTC+57.021EATHKTSTSPIVK	S	sp|P01837|IGKC_MOUSE	152	152	1.66233e-25	3.19651e-18	0	0
22	4763	HCD	736.667	1	-9.58665	3	R	NSYSC+57.021SVVHEGLHNHHTTK	S	sp|P01865|GCAM_MOUSE	180	177	1.70205e-25	3.2729e-18	0	0
23	31135	HCD	550.786	0	0.443259	4	R	VVSALPIQHQDWMSGKEFK	C	sp|P01865|GCAM_MOUSE	148	148	2.00722e-25	3.85971e-18	0	0
24	30703	HCD	550.786	0	0.775703	4	R	VVSALPIQHQDWMSGKEFK	C	sp|P01865|GCAM_MOUSE	155	155	2.00722e-25	3.85971e-18	0	0
25	30921	HCD	550.786	0	0.554073	4	R	VVSALPIQHQDWMSGKEFK	C	sp|P01865|GCAM_MOUSE	147	147	2.19263e-25	4.21623e-18	0	0
26	18712	HCD	581.87	0	4.72029	5	K	SNWEAGNTFTC+57.021SVLHEGLHNHHTEK	S	sp|P01869|IGH1M_MOUSE	175	160	2.49759e-25	4.85267e-18	0	0
27	4186	HCD	541.014	0	0.676897	4	R	HNSYTC+57.021EATHKTSTSPIVK	S	sp|P01837|IGKC_MOUSE	174	172	2.84689e-25	5.47431e-18	0	0
28	3451	HCD	442.207	0	0.966168	5	R	NSYSC+57.021SVVHEGLHNHHTTK	S	sp|P01865|GCAM_MOUSE	129	126	3.72513e-25	7.1631e-18	0	0
29	5470	HCD	442.404	1	-8.73597	5	R	NSYSC+57.021SVVHEGLHNHHTTK	S	sp|P01865|GCAM_MOUSE	135	128	4.58436e-25	8.81533e-18	0	0
30	35944	HCD	975.14	1	0.0215902	3	R	DC+57.021GC+57.021KPC+57.021IC+57.021TVPEVSSVFIFPPKPK	D	sp|P01869|IGH1M_MOUSE	185	163	7.20946e-25	1.40076e-17	0	0
31	37701	HCD	697.71	0	-3.67412	3	R	LNAGEVVIGDGGFVFALEKR	G	sp|O35490|BHMT1_MOUSE	190	186	8.00816e-25	1.54285e-17	0	0
32	37515	HCD	917.474	0	2.86059	3	R	FQTLVSKMEPLEMPADTITSDVIGK	C	sp|P97784|CRY1_MOUSE	164	143	1.02096e-24	1.98366e-17	0	0
33	21457	HCD	703.11	0	2.86465	4	R	IQEITEQLDITTSEYEKEKLNER	L	sp|P63038|CH60_MOUSE	266	250	1.04499e-24	2.02387e-17	0	0
34	31346	HCD	991.46	1	4.34332	2	R	YFDSFGDLSSASAIMGNAK	V	sp|P02088|HBB1_MOUSE	205	204	1.19928e-24	2.30612e-17	0	0
35	31576	HCD	990.95	0	-4.06509	2	R	YFDSFGDLSSASAIMGNAK	V	sp|P02088|HBB1_MOUSE	208	208	1.19928e-24	2.30612e-17	0	0
36	19111	HCD	540.021	1	-6.52913	4	K	C+57.021LIGVNYPKPMVNHAEASR	L	sp|P97784|CRY1_MOUSE	178	170	1.6344e-24	3.1428e-17	0	0
37	36240	HCD	796.66	0	1.22582	4	R	TTGIVMDSGDGVTHTVPIYEGYALPHAILR	L	sp|P60710|ACTB_MOUSE	157	126	2.14881e-24	4.20556e-17	0	0
38	4040	HCD	616.05	1	-8.59733	4	R	SSAGTGLSSGKRPSQEEDAQSVGPK	V	sp|P97784|CRY1_MOUSE	185	162	2.1891e-24	4.25329e-17	0	0
39	35704	HCD	974.808	0	2.81757	3	R	DC+57.021GC+57.021KPC+57.021IC+57.021TVPEVSSVFIFPPKPK	D	sp|P01869|IGH1M_MOUSE	177	155	2.51307e-24	4.88276e-17	0	0
40	4175	HCD	433.012	0	-0.281909	5	R	HNSYTC+57.021EATHKTSTSPIVK	S	sp|P01837|IGKC_MOUSE	149	147	3.57352e-24	6.87156e-17	0	0
41	33505	HCD	951.474	1	-5.88153	3	K	TTAPSVYPLAPVC+57.021GDTTGSSVTLGC+57.021LVK	G	sp|P01865|GCAM_MOUSE	181	146	4.13457e-24	8.06929e-17	0	0
42	4754	HCD	552.753	1	-8.58806	4	R	NSYSC+57.021SVVHEGLHNHHTTK	S	sp|P01865|GCAM_MOUSE	158	151	4.43593e-24	8.5299e-17	0	0
43	29544	HCD	945.8	0	-1.74238	3	K	TTPPSVYPLAPGC+57.021GDTTGSSVTLGC+57.021LVK	G	sp|P01867|IGG2B_MOUSE	204	170	5.2942e-24	1.03325e-16	0	0
44	34077	HCD	727.08	0	-3.02203	4	K	SNWEAGNTFTC+57.021SVLHEGLHNHHTEK	S	sp|P01869|IGH1M_MOUSE	165	132	5.87917e-24	1.14229e-16	0	0
45	37770	HCD	1218.1	0	-0.601282	2	K	FVYEGSADFSC+57.021LPTFGVIVAQK	S	sp|P51660|DHB4_MOUSE	165	155	1.01192e-23	1.95652e-16	0	0
46	37936	HCD	1085.04	1	4.64389	2	R	C+57.021VYILDPWFAGSSNVGINR	W	sp|P97784|CRY1_MOUSE	205	195	1.32714e-23	2.55197e-16	0	0
47	31120	HCD	991.45	1	-5.75782	2	R	YFDSFGDLSSASAIMGNAK	V	sp|P02088|HBB1_MOUSE	146	144	1.68694e-23	3.24384e-16	0	0
48	4786	HCD	442.403	1	-9.4951	5	R	NSYSC+57.021SVVHEGLHNHHTTK	S	sp|P01865|GCAM_MOUSE	147	133	2.77634e-23	5.33865e-16	0	0
49	4544	HCD	442.404	1	-7.7698	5	R	NSYSC+57.021SVVHEGLHNHHTTK	S	sp|P01865|GCAM_MOUSE	147	135	3.9261e-23	7.54955e-16	0	0
50	29526	HCD	946.14	1	4.15235	3	K	TTPPSVYPLAPGC+57.021GDTTGSSVTLGC+57.021LVK	G	sp|P01867|IGG2B_MOUSE	219	169	6.38499e-23	1.24613e-15	0	0
51	22837	HCD	652.026	0	-0.187217	3	R	VAPEEHPVLLTEAPLNPK	A	sp|P60710|ACTB_MOUSE	152	152	9.24521e-23	1.77419e-15	0	0
52	15584	HCD	854.09	0	2.78703	3	K	LVQDVANNTNEEAGDGTTTATVLAR	S	sp|P63038|CH60_MOUSE	188	156	1.24773e-22	2.42427e-15	0	0
53	15212	HCD	624.65	1	-6.61415	3	R	INVYYNEAAGNKYVPR	A	sp|Q7TMM9|TBB2A_MOUSE	177	177	2.20946e-22	4.22129e-15	0	0
54	35809	HCD	565.288	0	1.18769	4	R	SVSELPIMHQDWLNGKEFK	C	sp|P01869|IGH1M_MOUSE	152	144	2.9664e-22	5.70413e-15	0	0
55	4514	HCD	552.754	1	-6.37866	4	R	NSYSC+57.021SVVHEGLHNHHTTK	S	sp|P01865|GCAM_MOUSE	134	127	3.31699e-22	6.37828e-15	0	0
56	35988	HCD	796.91	1	0.173041	4	R	TTGIVMDSGDGVTHTVPIYEGYALPHAILR	L	sp|P60710|ACTB_MOUSE	151	105	3.35437e-22	6.56505e-15	0	0
57	18075	HCD	659.972	0	0.554889	3	R	EAAQMDMVNDGVEDLRGK	Y	sp|P19157|GSTP1_MOUSE	164	160	3.60807e-22	6.92402e-15	0	0
58	23322	HCD	550.786	0	0.110815	4	R	VVSALPIQHQDWMSGKEFK	C	sp|P01865|GCAM_MOUSE	114	111	3.75791e-22	7.22613e-15	0	0
59	23957	HCD	976.934	0	0.749716	2	K	NTEPVLDSDGSYFMYSK	L	sp|P01865|GCAM_MOUSE	188	184	3.95973e-22	7.58262e-15	0	0
60	18843	HCD	913.969	0	1.26883	2	K	TVAGGAWTYNTTSAVTVK	S	sp|P61514|RL37A_MOUSE	188	182	3.97036e-22	7.61926e-15	0	0
61	22907	HCD	976.933	0	0.624763	2	K	NTEPVLDSDGSYFMYSK	L	sp|P01865|GCAM_MOUSE	199	195	4.48964e-22	8.59736e-15	0	0
62	16354	HCD	602.635	0	-2.93712	3	K	NQVAMNPTNTVFDAKR	L	sp|P63017|HSP7C_MOUSE	162	160	4.77356e-22	9.12016e-15	0	0
63	35561	HCD	565.288	0	0.53986	4	R	SVSELPIMHQDWLNGKEFK	C	sp|P01869|IGH1M_MOUSE	140	128	6.38405e-22	1.2276e-14	0	0
64	10810	HCD	591.621	0	0.309498	3	K	FAGPYDKGEYSPSVQK	T	sp|P25688|URIC_MOUSE	172	172	7.74839e-22	1.48037e-14	0	0
65	22729	HCD	976.934	0	0.874668	2	K	NTEPVLDSDGSYFMYSK	L	sp|P01865|GCAM_MOUSE	158	152	7.99765e-22	1.5315e-14	0	0
66	5137	HCD	541.261	1	-7.64233	4	R	HNSYTC+57.021EATHKTSTSPIVK	S	sp|P01837|IGKC_MOUSE	184	166	8.31218e-22	1.59836e-14	0	0
67	23360	HCD	949.928	0	0.385515	2	K	NTATVLDSDGSYFMYSK	L	sp|P01864|GCAB_MOUSE	166	160	8.48409e-22	1.62465e-14	0	0
68	37941	HCD	723.359	0	1.60317	3	R	C+57.021VYILDPWFAGSSNVGINR	W	sp|P97784|CRY1_MOUSE	125	112	9.96511e-22	1.9162e-14	0	0
69	8589	HCD	564.581	0	0.75675	3	K	STAGDTHLGGEDFDNR	M	sp|P17156|HSP72_MOUSE	195	195	1.16548e-21	2.22672e-14	0	0
70	31200	HCD	973.976	0	0.375996	2	K	MEPLEMPADTITSDVIGK	C	sp|P97784|CRY1_MOUSE	180	172	1.25533e-21	2.40901e-14	0	0
71	4986	HCD	552.754	1	-6.5996	4	R	NSYSC+57.021SVVHEGLHNHHTTK	S	sp|P01865|GCAM_MOUSE	137	129	1.35671e-21	2.60883e-14	0	0
72	34555	HCD	924.15	0	-3.17013	3	R	LILPVGPAGGNQMLEQYDKLQDGSVK	M	sp|P23506|PIMT_MOUSE	151	119	1.97037e-21	3.83419e-14	0	0
73	22099	HCD	599.31	0	-0.611054	3	R	VVSALPIQHQDWMSGK	E	sp|P01865|GCAM_MOUSE	154	154	2.10274e-21	4.0174e-14	0	0
74	17243	HCD	614.96	0	-8.03923	3	R	IMDPNIVGNEHYDVAR	G	sp|P56480|ATPB_MOUSE	165	162	2.47057e-21	4.72015e-14	0	0
75	22271	HCD	599.31	0	-0.305527	3	R	VVSALPIQHQDWMSGK	E	sp|P01865|GCAM_MOUSE	134	133	2.52457e-21	4.82334e-14	0	0
76	22691	HCD	596.669	0	1.02293	3	R	IINEPTAAAIAYGLDKK	G	sp|P17156|HSP72_MOUSE	198	198	2.53592e-21	4.85612e-14	0	0
77	30370	HCD	928.017	0	-0.460386	2	-	DIVLTQSPASLAVSLGQR	A	sp|P01654|KV3A1_MOUSE	215	213	2.67454e-21	5.13255e-14	0	0
78	24138	HCD	976.932	0	-1.18705	2	K	NTEPVLDSDGSYFMYSK	L	sp|P01865|GCAM_MOUSE	173	168	2.73679e-21	5.24078e-14	0	0
79	3235	HCD	442.206	0	-2.13937	5	R	NSYSC+57.021SVVHEGLHNHHTTK	S	sp|P01865|GCAM_MOUSE	108	95	3.28157e-21	6.31017e-14	0	0
80	9812	HCD	502.44	1	-3.4991	5	R	HQGVMVGMGQKDSYVGDEAQSKR	G	sp|P60710|ACTB_MOUSE	110	86	3.97242e-21	7.6935e-14	0	0
81	5584	HCD	541.261	1	-7.64233	4	R	HNSYTC+57.021EATHKTSTSPIVK	S	sp|P01837|IGKC_MOUSE	173	157	4.68218e-21	9.00343e-14	0	0
82	23133	HCD	606	0	-6.04305	3	R	IINEPTAAAIAYGLDKR	E	sp|P20029|GRP78_MOUSE	167	166	4.8813e-21	9.34737e-14	0	0
83	23254	HCD	734.38	1	0.19497	3	R	VVSALPIQHQDWMSGKEFK	C	sp|P01865|GCAM_MOUSE	121	109	5.37753e-21	1.03405e-13	0	0
84	33543	HCD	1426.71	1	-5.0277	2	K	TTAPSVYPLAPVC+57.021GDTTGSSVTLGC+57.021LVK	G	sp|P01865|GCAM_MOUSE	163	118	5.38736e-21	1.05143e-13	0	0
85	19185	HCD	871.45	0	10.1557	3	K	LVESGFTTDPVTIENKGSTPQTYK	V	sp|P01872|IGHM_MOUSE	132	102	5.97748e-21	1.15956e-13	0	0
86	13316	HCD	684.35	0	0.713497	3	R	LHDNPALKEC+57.021IQGADTIR	C	sp|P97784|CRY1_MOUSE	166	156	6.49876e-21	1.24714e-13	0	0
87	37102	HCD	715.401	0	2.73012	3	K	TALDTFGRIDVVVNNAGILR	D	sp|P51660|DHB4_MOUSE	187	165	7.42679e-21	1.43084e-13	0	0
88	37650	HCD	850.73	0	0.645701	3	K	LC+57.021YVALDFEQEMATAASSSSLEK	S	sp|P60710|ACTB_MOUSE	136	106	7.74952e-21	1.50087e-13	0	0
89	7649	HCD	519.733	0	0.704614	4	R	SHNSFTC+57.021QVTHEGDTVEK	S	sp|P01845|LAC3_MOUSE	101	97	7.98777e-21	1.53288e-13	0	0
90	34955	HCD	776.4	0	1.57226	3	K	GYFPEPVTVKWNYGALSSGVR	T	sp|P03987|IGHG3_MOUSE	120	105	8.08408e-21	1.56031e-13	0	0
91	36107	HCD	534.787	0	1.82608	4	K	VTMQNLNDRLASYLDKVR	A	sp|Q61414|K1C15_MOUSE	150	138	9.455e-21	1.81445e-13	0	0
92	27178	HCD	848.43	1	-2.19419	2	K	ALDVGSGSGILTAC+57.021FAR	M	sp|P23506|PIMT_MOUSE	193	189	9.8876e-21	1.89341e-13	0	0
93	22650	HCD	652.027	0	0.655259	3	R	VAPEEHPVLLTEAPLNPK	A	sp|P60710|ACTB_MOUSE	129	123	1.0261e-20	1.96913e-13	0	0
94	12870	HCD	511.025	0	-0.895775	4	K	APQVYTIPPPKEQMAKDK	V	sp|P01869|IGH1M_MOUSE	125	117	1.26506e-20	2.4277e-13	0	0
95	29809	HCD	928.01	0	-8.41848	2	-	DIVLTQSPASLAVSLGQR	A	sp|P01654|KV3A1_MOUSE	208	203	1.353e-20	2.59645e-13	0	0
96	9724	HCD	627.8	1	-0.655664	4	R	HQGVMVGMGQKDSYVGDEAQSKR	G	sp|P60710|ACTB_MOUSE	153	123	1.73074e-20	3.35199e-13	0	0
97	21393	HCD	556.305	0	0	3	K	TLAFASVDLTNKTTGK	L	sp|Q9CQR4|ACO13_MOUSE	192	192	1.76311e-20	3.36852e-13	0	0
98	37462	HCD	892.95	1	0.0860535	4	K	NQLKDMAIATGGAVFGEEGLNLNLEDVQAHDLGK	V	sp|P63038|CH60_MOUSE	142	81	1.79972e-20	3.54118e-13	0	0
99	23620	HCD	977.44	1	5.65518	2	K	NTEPVLDSDGSYFMYSK	L	sp|P01865|GCAM_MOUSE	120	114	1.89503e-20	3.62885e-13	0	0
100	13349	HCD	513.51	1	-9.83925	4	R	IDVVSENPGQTHFHTIQK	S	sp|Q8C4V4|FBXL3_MOUSE	102	94	1.99183e-20	3.8224e-13	0	0
101	39590	HCD	931.477	0	-0.589726	2	K	QGFIDLPEFPFGLEPR	V	sp|O35490|BHMT1_MOUSE	165	165	2.2794e-20	4.35492e-13	0	0
102	34321	HCD	954.49	1	-2.15284	3	K	TTPPSVYPLAPGSAAQTNSMVTLGC+57.021LVK	G	sp|P01869|IGH1M_MOUSE	201	134	2.29934e-20	4.48754e-13	0	0
103	30589	HCD	734.38	1	0.19497	3	R	VVSALPIQHQDWMSGKEFK	C	sp|P01865|GCAM_MOUSE	115	95	2.33521e-20	4.49041e-13	0	0
104	21010	HCD	881.12	0	1.03905	3	K	LDQGGAPLAGTNKETTIQGLDGLSER	C	sp|Q91Y97|ALDOB_MOUSE	131	106	2.48527e-20	4.83613e-13	0	0
105	37615	HCD	1049.89	1	5.37019	3	R	GPTIKPC+57.021PPC+57.021KC+57.021PAPNLLGGPSVFIFPPK	I	sp|P01865|GCAM_MOUSE	238	161	2.51339e-20	4.91227e-13	0	0
106	39611	HCD	630.007	0	1.93761	3	K	VLDFEHFLPMLQTVAK	N	sp|Q60605|MYL6_MOUSE	137	131	2.53299e-20	4.83942e-13	0	0
107	30169	HCD	928.02	0	2.3677	2	-	DIVLTQSPASLAVSLGQR	A	sp|P01654|KV3A1_MOUSE	181	176	2.57958e-20	4.95031e-13	0	0
108	29868	HCD	927.53	0	4.54049	2	-	NIVLTQSPASLAVSLGQR	A	sp|P01662|KV3AA_MOUSE	153	146	2.62428e-20	5.03609e-13	0	0
109	33743	HCD	951.473	1	-6.77991	3	K	TTAPSVYPLAPVC+57.021GDTTGSSVTLGC+57.021LVK	G	sp|P01865|GCAM_MOUSE	159	119	2.69986e-20	5.26921e-13	0	0
110	14563	HCD	611.974	0	-0.897613	3	K	NQLTSNPENTVFDAKR	L	sp|P20029|GRP78_MOUSE	149	145	2.84771e-20	5.4407e-13	0	0
111	37965	HCD	637.679	0	1.72286	3	K	C+57.021PAPNLLGGPSVFIFPPK	I	sp|P01865|GCAM_MOUSE	130	127	2.9809e-20	5.72046e-13	0	0
112	21215	HCD	556.3	0	-9.32579	3	K	TLAFASVDLTNKTTGK	L	sp|Q9CQR4|ACO13_MOUSE	142	142	3.06769e-20	5.861e-13	0	0
113	28007	HCD	848.43	1	-2.19419	2	K	ALDVGSGSGILTAC+57.021FAR	M	sp|P23506|PIMT_MOUSE	172	169	3.57941e-20	6.85434e-13	0	0
114	13129	HCD	684.35	0	0.62431	3	R	LHDNPALKEC+57.021IQGADTIR	C	sp|P97784|CRY1_MOUSE	155	142	3.69986e-20	7.10017e-13	0	0
115	22501	HCD	596.67	0	2.96651	3	R	IINEPTAAAIAYGLDKK	G	sp|P17156|HSP72_MOUSE	164	159	3.99408e-20	7.6484e-13	0	0
116	39479	HCD	649.85	1	5.75578	4	K	VIHDNFGIVEGLMTTVHAITATQK	T	sp|P16858|G3P_MOUSE	133	101	4.58745e-20	8.8991e-13	0	0
117	18529	HCD	576.92	0	-9.62724	3	R	YIGGC+57.021C+57.021GFEPYHIR	A	sp|O35490|BHMT1_MOUSE	155	155	4.61789e-20	8.77727e-13	0	0
118	18551	HCD	808.94	0	-1.73537	2	K	LLIYAASNQGSGVPAR	F	sp|P01654|KV3A1_MOUSE	190	187	5.14446e-20	9.82877e-13	0	0
119	37684	HCD	1046.06	0	-5.01787	2	R	LNAGEVVIGDGGFVFALEKR	G	sp|O35490|BHMT1_MOUSE	157	140	5.44671e-20	1.04936e-12	0	0
120	20700	HCD	621.33	1	-6.7478	3	R	EQLNLRESATVTC+57.021LVK	G	sp|P01872|IGHM_MOUSE	159	157	5.80746e-20	1.10955e-12	0	0
121	24335	HCD	991.501	0	-1.04649	2	K	TVTNAVVTVPAYFNDSQR	Q	sp|P63017|HSP7C_MOUSE	196	177	6.05566e-20	1.1621e-12	0	0
122	19878	HCD	955.95	0	-10.2794	2	-	DIQMTQTTSSLSASLGDR	V	sp|P01645|KV5AC_MOUSE	203	186	6.0665e-20	1.16418e-12	0	0
123	3645	HCD	552.508	0	1.98845	4	R	NSYSC+57.021SVVHEGLHNHHTTK	S	sp|P01865|GCAM_MOUSE	165	125	6.63663e-20	1.27617e-12	0	0
124	8800	HCD	615.626	0	2.57773	3	K	TSKWEKTDSFSC+57.021NVR	H	sp|P01867|IGG2B_MOUSE	148	143	7.04658e-20	1.34296e-12	0	0
125	16810	HCD	715.874	0	1.2789	2	R	FVIGGPQGDAGVTGR	K	sp|Q91X83|METK1_MOUSE	197	197	7.52571e-20	1.43428e-12	0	0
126	16520	HCD	598.29	0	2.95847	3	K	YLDEDTVYHLQPSGR	F	sp|Q91X83|METK1_MOUSE	172	170	7.73589e-20	1.47433e-12	0	0
127	14834	HCD	599.99	0	-0.508634	3	K	APQVYTIPPPKEQMAK	D	sp|P01869|IGH1M_MOUSE	152	148	8.21123e-20	1.5688e-12	0	0
128	37822	HCD	968.013	0	-2.14376	2	R	LNAGEVVIGDGGFVFALEK	R	sp|O35490|BHMT1_MOUSE	153	144	8.49001e-20	1.63256e-12	0	0
129	24216	HCD	661.337	0	-0.461452	3	K	TVTNAVVTVPAYFNDSQR	Q	sp|P63017|HSP7C_MOUSE	114	106	9.02686e-20	1.73229e-12	0	0
130	28021	HCD	847.931	0	0.791795	2	K	ALDVGSGSGILTAC+57.021FAR	M	sp|P23506|PIMT_MOUSE	159	156	1.07099e-19	2.05088e-12	0	0
131	8409	HCD	564.58	0	-0.648643	3	K	STAGDTHLGGEDFDNR	M	sp|P17156|HSP72_MOUSE	153	142	1.11143e-19	2.12345e-12	0	0
132	17751	HCD	624.982	0	-3.71103	3	K	ATLTVDKSSSATYMELR	S	sp|P06330|HVM51_MOUSE	191	171	1.17228e-19	2.24484e-12	0	0
133	22132	HCD	1010.52	1	-1.66077	2	K	TQVTVQYMQDNGAVIPVR	I	sp|Q91X83|METK1_MOUSE	127	120	1.1914e-19	2.28634e-12	0	0
134	15558	HCD	854.42	1	-2.47654	3	K	LVQDVANNTNEEAGDGTTTATVLAR	S	sp|P63038|CH60_MOUSE	205	150	1.21158e-19	2.35403e-12	0	0
135	26758	HCD	927.96	0	-5.65649	2	K	FEDGDLTLYQSNAILR	H	sp|P46425|GSTP2_MOUSE	158	158	1.33579e-19	2.55209e-12	0	0
136	24347	HCD	895.95	0	0.476864	2	K	SYELPDGQVITIGNER	F	sp|P60710|ACTB_MOUSE	168	165	1.37755e-19	2.63188e-12	0	0
137	33265	HCD	951.472	1	-7.74246	3	K	TTAPSVYPLAPVC+57.021GDTTGSSVTLGC+57.021LVK	G	sp|P01865|GCAM_MOUSE	188	113	1.38723e-19	2.70739e-12	0	0
138	8218	HCD	526.933	0	-2.31662	3	K	ALAAAGYDVEKNNSR	I	sp|P43277|H13_MOUSE	169	169	1.47083e-19	2.80316e-12	0	0
139	16705	HCD	910.45	0	-6.23454	2	K	IVSNASC+57.021TTNC+57.021LAPLAK	V	sp|P16858|G3P_MOUSE	152	144	1.48093e-19	2.83588e-12	0	0
140	20611	HCD	589.565	0	0.828206	4	K	GSVRAPQVYVLPPPEEEMTKK	Q	sp|P01865|GCAM_MOUSE	125	99	1.64762e-19	3.18009e-12	0	0
141	1491	HCD	496.247	0	-0.245987	4	R	MVQEAEKYKAEDEKQR	D	sp|P63017|HSP7C_MOUSE	164	157	1.90811e-19	3.64555e-12	0	0
142	14646	HCD	564.964	0	-2.16067	3	K	AVANYDSVEAGEKLVK	T	sp|P51660|DHB4_MOUSE	155	147	1.96537e-19	3.75495e-12	0	0
143	7185	HCD	550.596	0	2.21706	3	K	TDSFSC+57.021NVRHEGLK	N	sp|P01867|IGG2B_MOUSE	140	140	1.97268e-19	3.74949e-12	0	0
144	10013	HCD	750.32	0	1.9523	3	R	SIGYDDTDESHC+57.021VEHIESR	T	sp|P43883|PLIN2_MOUSE	110	99	2.04515e-19	3.93265e-12	0	0
145	22266	HCD	544.31	0	4.26107	3	K	VGEVIVTKDDAMLLK	G	sp|P63038|CH60_MOUSE	159	159	2.1502e-19	4.09792e-12	0	0
146	23822	HCD	1176.08	0	8.09601	2	R	ILMTSSASGIYGNFGQANYSAAK	L	sp|P51660|DHB4_MOUSE	149	115	2.16583e-19	4.19463e-12	0	0
147	17547	HCD	624.986	0	2.8321	3	K	ATLTVDKSSSATYMELR	S	sp|P06330|HVM51_MOUSE	201	177	2.19231e-19	4.19812e-12	0	0
148	24884	HCD	758.86	0	-6.11265	2	K	FYGPEGPYGVFAGR	D	sp|O55022|PGRC1_MOUSE	123	122	2.31867e-19	4.40712e-12	0	0
149	7265	HCD	531.597	0	1.14815	3	K	MKETAENYLGHTAK	N	sp|P38647|GRP75_MOUSE	133	133	2.32518e-19	4.4195e-12	0	0
150	32006	HCD	1028.98	1	-6.14116	2	K	STNGDTFLGGEDFDQALLR	H	sp|P38647|GRP75_MOUSE	171	162	2.33127e-19	4.48284e-12	0	0
151	19254	HCD	854.43	0	1.92872	3	K	AIQVYYNPDQPPKPGMIDSATQK	S	sp|Q8VCM7|FIBG_MOUSE	145	109	2.34729e-19	4.54607e-12	0	0
152	8637	HCD	544.611	0	0.336214	3	K	ISGQKVNEAAC+57.021DIAR	Q	sp|O35490|BHMT1_MOUSE	182	182	2.38304e-19	4.54167e-12	0	0
153	38008	HCD	908.46	0	-3.82955	2	R	TTSLELFMYLNEVAGK	H	sp|P16460|ASSY_MOUSE	143	140	2.48302e-19	4.74394e-12	0	0
154	4247	HCD	616.05	1	-8.59733	4	R	SSAGTGLSSGKRPSQEEDAQSVGPK	V	sp|P97784|CRY1_MOUSE	179	142	2.96989e-19	5.77032e-12	0	0
155	34193	HCD	858.49	0	2.13288	2	K	LLIYLASNLESGVPAR	F	sp|P01662|KV3AA_MOUSE	148	147	3.14267e-19	6.00424e-12	0	0
156	35489	HCD	954.486	1	-5.92693	3	K	TTPPSVYPLAPGSAAQTNSMVTLGC+57.021LVK	G	sp|P01869|IGH1M_MOUSE	202	128	3.55755e-19	6.94313e-12	0	0
157	21431	HCD	733.37	1	5.02455	3	K	YVTLIYTNYENGKNDYVK	A	sp|P19157|GSTP1_MOUSE	123	107	3.81007e-19	7.31167e-12	0	0
158	25600	HCD	896.45	1	-1.39536	2	K	SYELPDGQVITIGNER	F	sp|P60710|ACTB_MOUSE	168	165	3.98336e-19	7.61043e-12	0	0
159	36200	HCD	923.41	0	-1.38805	2	K	ASGYTFTDYYMNWVK	Q	sp|P06330|HVM51_MOUSE	119	106	3.98636e-19	7.59734e-12	0	0
160	18832	HCD	756.42	0	-6.69718	2	K	LLESGGGLVQPGGSLK	L	sp|P01808|HVM38_MOUSE	159	156	4.09977e-19	7.83284e-12	0	0
161	8450	HCD	544.611	0	0.448285	3	K	ISGQKVNEAAC+57.021DIAR	Q	sp|O35490|BHMT1_MOUSE	175	172	4.1209e-19	7.85375e-12	0	0
162	5440	HCD	454.73	0	-0.671114	4	K	HIAEEADRKYEEVAR	K	sp|P21107|TPM3_MOUSE	161	156	4.36605e-19	8.32098e-12	0	0
163	27992	HCD	844.97	1	-5.02194	2	K	LLIYAASNLESGIPAR	F	sp|P01665|KV3AD_MOUSE	136	134	4.60132e-19	8.79108e-12	0	0
164	20275	HCD	875.954	1	4.42834	2	K	LVESGFTTDPVTIENK	G	sp|P01872|IGHM_MOUSE	118	118	4.8186e-19	9.2062e-12	0	0
165	20124	HCD	875.95	1	-0.661126	2	K	LVESGFTTDPVTIENK	G	sp|P01872|IGHM_MOUSE	133	133	4.98667e-19	9.5273e-12	0	0
166	36317	HCD	889.491	0	2.53888	2	R	TAVDSGIALLTNFQVTK	L	sp|Q8C196|CPSM_MOUSE	106	103	6.88167e-19	1.31779e-11	0	0
167	15015	HCD	599.991	0	0.915542	3	K	APQVYTIPPPKEQMAK	D	sp|P01869|IGH1M_MOUSE	141	131	6.98828e-19	1.33515e-11	0	0
168	16844	HCD	745.868	0	0.818311	2	K	GILAADESVGTMGNR	L	sp|Q91Y97|ALDOB_MOUSE	148	146	8.89935e-19	1.69607e-11	0	0
169	6154	HCD	402.216	0	-1.74509	4	K	SGGASHSELIHNLRK	N	sp|P23506|PIMT_MOUSE	193	192	9.41384e-19	1.79412e-11	0	0
170	31919	HCD	1028.49	0	5.22234	2	K	STNGDTFLGGEDFDQALLR	H	sp|P38647|GRP75_MOUSE	159	142	1.0273e-18	1.9754e-11	0	0
171	13049	HCD	660.33	0	5.26861	3	K	FVEGAREVEMDAVGKEGR	V	sp|Q8C196|CPSM_MOUSE	153	137	1.06915e-18	2.05173e-11	0	0
172	28089	HCD	901.42	1	3.07145	3	K	TELNYKNTEPVLDSDGSYFMYSK	L	sp|P01865|GCAM_MOUSE	115	86	1.11214e-18	2.15392e-11	0	0
173	28184	HCD	844.97	1	-5.02194	2	K	LLIYAASNLESGIPAR	F	sp|P01665|KV3AD_MOUSE	151	146	1.26906e-18	2.42462e-11	0	0
174	15872	HCD	536.298	0	0.682849	3	R	LIYATSSLDSGVPKR	F	sp|P01639|KV5A7_MOUSE	159	155	1.31723e-18	2.51042e-11	0	0
175	13158	HCD	513.515	0	1.90173	4	R	LHDNPALKEC+57.021IQGADTIR	C	sp|P97784|CRY1_MOUSE	118	111	1.33767e-18	2.56703e-11	0	0
176	17932	HCD	788.89	1	-10.5661	2	R	ILGADTSVDLEETGR	V	sp|Q03265|ATPA_MOUSE	184	184	1.44753e-18	2.75875e-11	0	0
177	12827	HCD	537.609	0	1.58943	3	R	TIEKFEKEAAEMGK	G	sp|P10126|EF1A1_MOUSE	151	142	1.50725e-18	2.86484e-11	0	0
178	26429	HCD	762.72	0	-4.08116	3	K	AGASIVGVNC+57.021HFDPSVSLQTVK	L	sp|O35490|BHMT1_MOUSE	155	120	1.54324e-18	2.98383e-11	0	0
179	7065	HCD	578.94	0	-1.05426	3	K	SAEAAAEATKNMEAGAGR	A	sp|Q8VC30|TKFC_MOUSE	161	138	1.59436e-18	3.05964e-11	0	0
180	13616	HCD	811.86	1	-4.24895	2	R	SLTSEDSAVYYC+57.021AR	G	sp|P06330|HVM51_MOUSE	125	125	1.59653e-18	3.03455e-11	0	0
181	13438	HCD	811.362	0	0.601805	2	R	SLTSEDSAVYYC+57.021AR	G	sp|P06330|HVM51_MOUSE	196	194	1.59653e-18	3.03455e-11	0	0
182	21407	HCD	833.96	0	7.02602	2	K	TLAFASVDLTNKTTGK	L	sp|Q9CQR4|ACO13_MOUSE	148	146	1.69049e-18	3.22978e-11	0	0
183	13937	HCD	815.87	0	-1.04734	2	K	YFGSIDSSEAEAGAAR	A	sp|O35973|PER1_MOUSE	172	165	1.7545e-18	3.35207e-11	0	0
184	16173	HCD	1281.12	1	-6.55248	2	K	LVQDVANNTNEEAGDGTTTATVLAR	S	sp|P63038|CH60_MOUSE	146	113	1.77612e-18	3.4509e-11	0	0
185	18493	HCD	725.86	0	-3.27937	2	R	TTPSVVAFTADGER	L	sp|P38647|GRP75_MOUSE	175	175	1.90278e-18	3.61663e-11	0	0
186	37922	HCD	956.016	0	2.68142	2	K	C+57.021PAPNLLGGPSVFIFPPK	I	sp|P01865|GCAM_MOUSE	175	154	1.92124e-18	3.68692e-11	0	0
187	16535	HCD	515.968	0	1.77439	3	K	AAVAVPNRPPDAVLR	D	sp|P51660|DHB4_MOUSE	161	150	2.00885e-18	3.82853e-11	0	0
188	12259	HCD	933.42	1	-4.74208	2	K	LNSVTTEDTATYYC+57.021AR	-	sp|P18531|HVM60_MOUSE	139	127	2.00902e-18	3.83834e-11	0	0
189	26036	HCD	847.415	0	0.576201	2	K	YIYDPWNAPEGIQK	V	sp|P97784|CRY1_MOUSE	142	128	2.08073e-18	3.95486e-11	0	0
190	15951	HCD	854.42	1	-2.47654	3	K	LVQDVANNTNEEAGDGTTTATVLAR	S	sp|P63038|CH60_MOUSE	140	104	2.108e-18	4.09572e-11	0	0
191	18324	HCD	803.365	0	1.13962	2	R	SLTSEDSAVYFC+57.021AR	S	sp|P01746|HVM02_MOUSE	201	199	2.16441e-18	4.11392e-11	0	0
192	24410	HCD	847.93	0	1.79954	2	K	NAVITVPAYFNDSQR	Q	sp|P38647|GRP75_MOUSE	155	149	2.31836e-18	4.41841e-11	0	0
193	19381	HCD	734.11	0	3.90768	4	K	ASGKPVAATMC+57.021IGPEGDLHGVPPGEC+57.021AVR	L	sp|O35490|BHMT1_MOUSE	165	120	2.65826e-18	5.1954e-11	0	0
194	9992	HCD	525.28	0	4.76404	3	R	ALLAGKDSETGENIR	Q	sp|P38647|GRP75_MOUSE	165	163	2.81019e-18	5.35575e-11	0	0
195	22282	HCD	598.325	0	0.714071	3	K	LLIYYTSSLHSGVPSR	F	sp|P01643|KV5AA_MOUSE	156	147	3.03814e-18	5.80453e-11	0	0
196	15690	HCD	665.37	0	1.83463	3	-	EVQLQQSGPELVKPGASVK	M	sp|P01756|HVM12_MOUSE	139	128	3.05993e-18	5.88397e-11	0	0
197	38054	HCD	838.447	0	1.6743	2	K	AAGVSVEPFWPGLFAK	A	sp|P47955|RLA1_MOUSE	136	127	3.1246e-18	5.96971e-11	0	0
198	27568	HCD	808.897	0	0	2	K	SFYPEEVSSMVLTK	M	sp|P63017|HSP7C_MOUSE	134	129	3.14079e-18	5.96974e-11	0	0
199	15420	HCD	691.03	0	5.65283	3	R	AQTPQVYTIPPPREQMSK	K	sp|P03987|IGHG3_MOUSE	141	119	3.1574e-18	6.05917e-11	0	0
200	17899	HCD	759.89	0	-2.00802	2	K	TVSLNNLSADEVTR	A	sp|Q9CQ75|NDUA2_MOUSE	164	164	3.16137e-18	6.00885e-11	0	0
201	28593	HCD	809.4	1	1.09539	2	K	SFYPEEVSSMVLTK	M	sp|P63017|HSP7C_MOUSE	130	125	3.52873e-18	6.7071e-11	0	0
202	31882	HCD	551.032	1	-9.27977	4	R	VVSALPIQHQDWMSGKEFK	C	sp|P01865|GCAM_MOUSE	132	105	3.56595e-18	6.857e-11	0	0
203	15439	HCD	643.38	0	4.07927	2	K	VLQATVVAVGSGGK	G	sp|Q64433|CH10_MOUSE	115	115	3.64176e-18	6.92193e-11	0	0
204	19019	HCD	557.275	0	2.73811	3	K	LSIEYDSEPFGKER	D	sp|P97784|CRY1_MOUSE	147	147	3.68308e-18	7.00048e-11	0	0
205	8434	HCD	586.96	0	8.00693	3	K	LIC+57.021EMKVEEQHTNK	L	sp|Q9CQR4|ACO13_MOUSE	116	115	3.73558e-18	7.10026e-11	0	0
206	9428	HCD	575.625	0	-6.36193	3	R	QAVTNPNNTFYATKR	L	sp|P38647|GRP75_MOUSE	97	92	3.7812e-18	7.20634e-11	0	0
207	15511	HCD	533.921	0	2.28631	3	K	HIGYDDSAKGFDFK	T	sp|Q91X83|METK1_MOUSE	139	124	3.90575e-18	7.42371e-11	0	0
208	14754	HCD	780.84	0	-6.01875	2	R	GYVSC+57.021ALGC+57.021PYEGK	V	sp|P38060|HMGCL_MOUSE	129	126	3.98121e-18	7.56713e-11	0	0
209	27051	HCD	859.48	0	2.55651	2	R	LLIYDTSNLASGVPVR	F	sp|P04945|KV6AB_MOUSE	158	151	4.34168e-18	8.29501e-11	0	0
210	20835	HCD	652.677	0	0.841637	3	R	APQVYVLPPPEEEMTKK	Q	sp|P01865|GCAM_MOUSE	124	108	4.88873e-18	9.36159e-11	0	0
211	32227	HCD	1028.98	1	-6.14116	2	K	STNGDTFLGGEDFDQALLR	H	sp|P38647|GRP75_MOUSE	174	152	5.0932e-18	9.79378e-11	0	0
212	13197	HCD	549.606	0	-0.333157	3	R	ALEEAMEQKAELER	L	sp|Q8VDD5|MYH9_MOUSE	165	163	5.10087e-18	9.69529e-11	0	0
213	21506	HCD	789.4	0	5.18036	2	K	YVTLIYTNYENGK	N	sp|P19157|GSTP1_MOUSE	101	101	5.16487e-18	9.78782e-11	0	0
214	15103	HCD	615.65	1	-0.858535	3	R	INVYYNEATGGKYVPR	A	sp|P68372|TBB4B_MOUSE	120	108	5.53325e-18	1.05716e-10	0	0
215	13030	HCD	400.751	0	-0.152302	4	R	IAPRPASGPIRPIVR	C	sp|P47963|RL13_MOUSE	145	142	5.55941e-18	1.05953e-10	0	0
216	28238	HCD	848.43	1	-2.19419	2	K	ALDVGSGSGILTAC+57.021FAR	M	sp|P23506|PIMT_MOUSE	112	100	5.62098e-18	1.07638e-10	0	0
217	14251	HCD	552.653	0	1.1044	3	R	VLTVINQTQKENLR	K	sp|Q6ZWV7|RL35_MOUSE	171	165	5.64859e-18	1.07363e-10	0	0
218	15241	HCD	554.3	1	-5.47091	3	R	TIVEEVQDGKVISSR	E	sp|Q9QWL7|K1C17_MOUSE	110	106	6.21521e-18	1.18452e-10	0	0
219	16640	HCD	665.697	1	-9.1415	3	-	EVQLQQSGPELVKPGASVK	M	sp|P01756|HVM12_MOUSE	180	152	6.23515e-18	1.19897e-10	0	0
220	22883	HCD	662.6	0	-0.644802	4	K	ALDLDPSKTNVSGGAIALGHPLGGSGSR	I	sp|Q8BWT1|THIM_MOUSE	134	93	6.29669e-18	1.2289e-10	0	0
221	8207	HCD	477.58	0	-3.70621	3	K	VLGNPKSDEMNVK	V	sp|Q60605|MYL6_MOUSE	154	154	6.38408e-18	1.20983e-10	0	0
222	9877	HCD	557.293	0	-2.29993	3	K	C+57.021KVNNKDLPSPIER	T	sp|P01867|IGG2B_MOUSE	137	132	6.77509e-18	1.28775e-10	0	0
223	27560	HCD	859.48	0	2.55651	2	R	LLIYDTSNLASGVPVR	F	sp|P04945|KV6AB_MOUSE	143	134	7.63554e-18	1.45881e-10	0	0
224	18381	HCD	808.94	0	-1.73537	2	K	LLIYAASNQGSGVPAR	F	sp|P01654|KV3A1_MOUSE	137	128	8.16024e-18	1.55906e-10	0	0
225	6710	HCD	485.5	1	-4.11823	4	R	LKSNNYATHYAESVKGR	F	sp|P01801|HVM32_MOUSE	148	124	8.81094e-18	1.68724e-10	0	0
226	27572	HCD	1108.54	1	-0.191845	2	K	DLYANTVLSGGTTMYPGIADR	M	sp|P60710|ACTB_MOUSE	161	137	9.04143e-18	1.74509e-10	0	0
227	13245	HCD	811.36	0	-2.18154	2	R	SLTSEDSAVYYC+57.021AR	G	sp|P06330|HVM51_MOUSE	109	107	9.38266e-18	1.78337e-10	0	0
228	14680	HCD	863.93	0	1.90751	2	R	IIPSTEDPNEDIVER	N	sp|P01592|IGJ_MOUSE	145	141	9.77654e-18	1.86325e-10	0	0
229	33513	HCD	954.49	1	-2.15284	3	K	TTPPSVYPLAPGSAAQTNSMVTLGC+57.021LVK	G	sp|P01869|IGH1M_MOUSE	180	111	1.00567e-17	1.96274e-10	0	0
230	39545	HCD	616.99	1	-8.87379	3	R	FLLQC+57.021LEDLDANLRK	L	sp|P97784|CRY1_MOUSE	157	144	1.00594e-17	1.91716e-10	0	0
231	35933	HCD	923.92	1	7.6354	2	K	ASGYTFTDYYMNWVK	Q	sp|P06330|HVM51_MOUSE	100	83	1.02143e-17	1.94668e-10	0	0
232	19199	HCD	552.314	0	0.55254	3	R	VYNVTQHAVGIIVNK	Q	sp|O09167|RL21_MOUSE	143	128	1.12015e-17	2.13482e-10	0	0
233	37203	HCD	874.446	0	0.977182	2	R	IMEGPAFNFLDAPAVR	V	sp|Q9D051|ODPB_MOUSE	117	103	1.13518e-17	2.16883e-10	0	0
234	18707	HCD	919.47	1	-2.42307	2	K	SQIFSTASDNQPTVTIK	V	sp|P20029|GRP78_MOUSE	122	107	1.22414e-17	2.34416e-10	0	0
235	14533	HCD	520.284	0	1.75967	3	R	FVIGGPQGDAGVTGRK	I	sp|Q91X83|METK1_MOUSE	169	155	1.26603e-17	2.41882e-10	0	0
236	18026	HCD	543.947	0	1.3465	3	R	GYSFTTTAEREIVR	D	sp|P60710|ACTB_MOUSE	151	144	1.27682e-17	2.42686e-10	0	0
237	22933	HCD	700.68	0	-2.96168	3	K	ATAVMPDGQFKDISLSEYK	G	sp|P35700|PRDX1_MOUSE	118	98	1.28205e-17	2.46526e-10	0	0
238	17544	HCD	496.77	0	-1.47437	4	K	AVLSLHTQKEEQAFLNR	F	sp|O35973|PER1_MOUSE	80	74	1.30939e-17	2.5074e-10	0	0
239	39544	HCD	573.963	0	1.0634	3	R	FLLQC+57.021LEDLDANLR	K	sp|P97784|CRY1_MOUSE	106	106	1.31154e-17	2.49285e-10	0	0
240	18930	HCD	835.408	0	0.657543	2	K	LSIEYDSEPFGKER	D	sp|P97784|CRY1_MOUSE	178	176	1.35779e-17	2.58076e-10	0	0
241	7950	HCD	479.727	0	-1.90843	4	K	SGVYKHEAGDMMGGHAIR	I	sp|P10605|CATB_MOUSE	116	101	1.40367e-17	2.6937e-10	0	0
242	2167	HCD	531.29	0	-0.229762	3	K	AQASAPAQAPKGAQAPK	G	sp|P47915|RL29_MOUSE	149	134	1.48659e-17	2.84671e-10	0	0
243	17376	HCD	925.48	0	-2.30824	3	K	LASVPAGGAVAVSAAPGSAAPAAGSAPAAAEEK	K	sp|P99027|RLA2_MOUSE	145	82	1.50371e-17	2.9549e-10	0	0
244	31909	HCD	952.996	0	-2.56182	2	R	MNANSLLASPTGLSPYLR	F	sp|P97784|CRY1_MOUSE	169	150	1.54212e-17	2.95939e-10	0	0
245	10599	HCD	543.6	0	2.2456	3	R	SSGPYGGGGQYFAKPR	N	sp|P49312|ROA1_MOUSE	103	96	1.60591e-17	3.06818e-10	0	0
246	14409	HCD	545.26	0	-5.93266	3	K	GVASVC+57.021VEDWNNRK	E	sp|P01872|IGHM_MOUSE	142	131	1.62914e-17	3.09652e-10	0	0
247	16905	HCD	822.871	0	-0.22252	2	K	MTQSPSSMYASLGER	V	sp|P01638|KV5A6_MOUSE	176	159	1.62974e-17	3.10601e-10	0	0
248	21028	HCD	557.55	0	7.99139	4	K	TQDPAKAPNSPDVLEIEFKK	G	sp|P16460|ASSY_MOUSE	121	101	1.67285e-17	3.2229e-10	0	0
249	31747	HCD	734.37	1	-13.4415	3	R	VVSALPIQHQDWMSGKEFK	C	sp|P01865|GCAM_MOUSE	124	85	1.70842e-17	3.28514e-10	0	0
250	15782	HCD	774.91	0	0.157528	2	R	MQKEITALAPSTMK	I	sp|P60710|ACTB_MOUSE	139	135	1.72016e-17	3.26953e-10	0	0
251	11869	HCD	510.257	0	3.11004	3	R	HVLQQFADNDVSR	F	sp|P51660|DHB4_MOUSE	105	105	1.74513e-17	3.30715e-10	0	0
252	12978	HCD	516.62	1	6.30645	3	R	SAGVKVETTEDLVAK	L	sp|Q9DCW4|ETFB_MOUSE	123	118	1.78344e-17	3.39895e-10	0	0
253	18844	HCD	628.97	0	3.10529	3	R	VAEFTTNLMEEEEKSK	S	sp|Q8VDD5|MYH9_MOUSE	100	92	1.87313e-17	3.57873e-10	0	0
254	29723	HCD	928.03	0	13.1539	2	-	DIVLTQSPASLAVSLGQR	A	sp|P01654|KV3A1_MOUSE	156	134	2.01114e-17	3.85944e-10	0	0
255	18475	HCD	545.6	0	-4.1391	3	K	LGDVYVNDAFGTAHR	A	sp|P09041|PGK2_MOUSE	85	79	2.1005e-17	4.00321e-10	0	0
256	18454	HCD	539.63	0	0.339317	3	K	LLIYAASNQGSGVPAR	F	sp|P01654|KV3A1_MOUSE	102	96	2.10451e-17	4.02079e-10	0	0
257	28046	HCD	844.47	0	-3.03559	2	K	LLIYAASNLESGIPAR	F	sp|P01665|KV3AD_MOUSE	124	115	2.18402e-17	4.1727e-10	0	0
258	4475	HCD	615.804	0	0.0991145	4	R	SSAGTGLSSGKRPSQEEDAQSVGPK	V	sp|P97784|CRY1_MOUSE	135	94	2.32619e-17	4.51964e-10	0	0
259	9671	HCD	468.246	0	2.15075	3	R	YATALYSAASKEK	K	sp|Q9DB20|ATPO_MOUSE	112	112	2.37843e-17	4.5073e-10	0	0
260	12803	HCD	486.94	0	2.75758	3	K	GSSAADKVVAEIRR	K	sp|P51660|DHB4_MOUSE	154	154	2.41792e-17	4.59576e-10	0	0
261	10947	HCD	505.94	0	2.71434	3	R	EVQTNDLKEVVNK	L	sp|P97351|RS3A_MOUSE	108	108	2.54043e-17	4.81431e-10	0	0
262	17092	HCD	744.354	0	-0.737977	2	R	TTPSYVAFTDTER	L	sp|P17879|HS71B_MOUSE	167	166	2.63945e-17	5.00195e-10	0	0
263	7047	HCD	483.199	0	-0.568416	3	K	C+57.021MTPLSDDHDEK	Y	sp|P97784|CRY1_MOUSE	100	100	2.67784e-17	5.05783e-10	0	0
264	15656	HCD	652.31	0	-2.90059	2	R	FSGSGSGTDFTLK	I	sp|P01631|KV2A7_MOUSE	161	161	2.76918e-17	5.2478e-10	0	0
265	23848	HCD	1176.57	1	-1.84147	2	R	ILMTSSASGIYGNFGQANYSAAK	L	sp|P51660|DHB4_MOUSE	150	102	2.83603e-17	5.49263e-10	0	0
266	39511	HCD	860.443	0	3.19207	2	R	FLLQC+57.021LEDLDANLR	K	sp|P97784|CRY1_MOUSE	155	151	2.85295e-17	5.42264e-10	0	0
267	14953	HCD	661.315	0	1.56899	3	K	AADKDTC+57.021FSTEGPNLVTR	C	sp|P07724|ALBU_MOUSE	131	116	2.85435e-17	5.4776e-10	0	0
268	23515	HCD	596.996	1	-10.8078	3	R	IINEPTAAAIAYGLDKK	G	sp|P17156|HSP72_MOUSE	141	113	2.86328e-17	5.48298e-10	0	0
269	18350	HCD	576.926	0	0.952144	3	R	YIGGC+57.021C+57.021GFEPYHIR	A	sp|O35490|BHMT1_MOUSE	95	91	2.88785e-17	5.48897e-10	0	0
270	11077	HCD	664.34	1	-2.15907	2	R	IIYGGSVTGATC+57.021K	E	sp|P17751|TPIS_MOUSE	117	115	3.01803e-17	5.7194e-10	0	0
271	15577	HCD	691.02	0	-8.83254	3	R	AQTPQVYTIPPPREQMSK	K	sp|P03987|IGHG3_MOUSE	146	109	3.024e-17	5.80317e-10	0	0
272	18451	HCD	570.985	0	1.81721	3	R	VVDALGNAIDGKGPIGSK	T	sp|Q03265|ATPA_MOUSE	121	105	3.05156e-17	5.85606e-10	0	0
273	20067	HCD	728.89	0	5.86163	2	K	ANEELAGVVAEVQK	N	sp|Q61176|ARGI1_MOUSE	146	142	3.05884e-17	5.81398e-10	0	0
274	33615	HCD	769.4	1	-5.43613	2	K	TFAPEEISAMVLTK	M	sp|P20029|GRP78_MOUSE	113	111	3.09455e-17	5.88185e-10	0	0
275	11848	HCD	764.879	0	0.718174	2	R	HVLQQFADNDVSR	F	sp|P51660|DHB4_MOUSE	149	149	3.14912e-17	5.96783e-10	0	0
276	13446	HCD	509.943	0	1.61582	3	K	GIDLTQVKGTGPEGR	I	sp|Q8BMF4|ODP2_MOUSE	134	122	3.18417e-17	6.06851e-10	0	0
277	9265	HCD	659.817	0	-0.555019	2	R	FSGSGSGTQYSLK	I	sp|P01635|KV5A3_MOUSE	187	187	3.19038e-17	6.04601e-10	0	0
278	11670	HCD	510.254	0	-2.0933	3	R	HVLQQFADNDVSR	F	sp|P51660|DHB4_MOUSE	96	95	3.24871e-17	6.15655e-10	0	0
279	34565	HCD	820.468	1	18.0524	2	K	SLNNKFASFIDKVR	F	sp|P11679|K2C8_MOUSE	127	119	3.28761e-17	6.2488e-10	0	0
280	23160	HCD	914.462	0	-1.06791	2	R	APQVYVLPPPEEEMTK	K	sp|P01865|GCAM_MOUSE	178	153	3.30904e-17	6.32211e-10	0	0
281	18516	HCD	530.3	0	3.10759	3	K	THINIVVIGHVDSGK	S	sp|P10126|EF1A1_MOUSE	79	75	3.36179e-17	6.40702e-10	0	0
282	6029	HCD	535.955	0	2.16375	3	K	SGGASHSELIHNLRK	N	sp|P23506|PIMT_MOUSE	127	120	3.37966e-17	6.44108e-10	0	0
283	30974	HCD	973.976	0	0	2	K	MEPLEMPADTITSDVIGK	C	sp|P97784|CRY1_MOUSE	143	122	3.55729e-17	6.82658e-10	0	0
284	16727	HCD	822.87	0	-1.78016	2	K	MTQSPSSMYASLGER	V	sp|P01638|KV5A6_MOUSE	115	103	3.59639e-17	6.85413e-10	0	0
285	16212	HCD	681.32	0	-0.358335	2	R	FSSSGSGTDFTLR	I	sp|P03976|KV2A5_MOUSE	153	153	3.64498e-17	6.90752e-10	0	0
286	6356	HCD	688.326	0	0.266016	2	K	AQSELSGAADEAAR	A	sp|Q9D3D9|ATPD_MOUSE	137	134	3.72003e-17	7.0707e-10	0	0
287	16631	HCD	715.87	0	-4.17773	2	R	FVIGGPQGDAGVTGR	K	sp|Q91X83|METK1_MOUSE	173	165	3.76849e-17	7.18211e-10	0	0
288	12044	HCD	602.327	0	-1.21599	2	K	FAAATGATPIAGR	F	sp|P14206|RSSA_MOUSE	167	167	4.02119e-17	7.62047e-10	0	0
289	38099	HCD	819.457	0	0.59586	2	K	AFAISGPFNVQFLVK	G	sp|Q8C196|CPSM_MOUSE	105	95	4.32031e-17	8.2338e-10	0	0
290	14788	HCD	651.82	0	0.187276	2	R	FSGSGSGTQFSLK	I	sp|P01636|KV5A4_MOUSE	156	156	4.32518e-17	8.19655e-10	0	0
291	30826	HCD	734.38	1	0.19497	3	R	VVSALPIQHQDWMSGKEFK	C	sp|P01865|GCAM_MOUSE	106	78	4.34041e-17	8.34622e-10	0	0
292	22833	HCD	560.628	0	0.217739	3	R	VVSALPIQHQDWMR	G	sp|P03987|IGHG3_MOUSE	107	97	4.34652e-17	8.26148e-10	0	0
293	19819	HCD	684.35	1	-0.861537	3	K	DGKLVESGFTTDPVTIENK	G	sp|P01872|IGHM_MOUSE	122	99	4.37864e-17	8.41975e-10	0	0
294	18890	HCD	729.12	1	0.859052	4	K	DGKLVESGFTTDPVTIENKGSTPQTYK	V	sp|P01872|IGHM_MOUSE	130	78	4.41781e-17	8.60954e-10	0	0
295	23018	HCD	609.978	0	-0.900551	3	R	APQVYVLPPPEEEMTK	K	sp|P01865|GCAM_MOUSE	103	91	4.94137e-17	9.44077e-10	0	0
296	8049	HCD	527.27	1	3.2832	3	K	ALAAAGYDVEKNNSR	I	sp|P43277|H13_MOUSE	149	138	5.17509e-17	9.86287e-10	0	0
297	12804	HCD	712.342	0	4.19846	2	R	ELAEDGYSGVEVR	V	sp|P62908|RS3_MOUSE	159	157	5.43171e-17	1.02935e-09	0	0
298	9925	HCD	551.964	0	1.76925	3	K	C+57.021KVNNKDLPAPIER	T	sp|P01865|GCAM_MOUSE	128	118	5.59147e-17	1.06278e-09	0	0
299	17393	HCD	715.839	0	0.170528	2	R	EFFYTAATNNPR	F	sp|P97784|CRY1_MOUSE	159	156	5.95408e-17	1.12459e-09	0	0
300	12126	HCD	660.34	0	-12.2006	2	K	AAPAAAAAMAPPGPR	V	sp|Q8BMF4|ODP2_MOUSE	127	119	5.98456e-17	1.14056e-09	0	0
301	7171	HCD	676.821	0	1.35269	2	K	AVANYDSVEAGEK	L	sp|P51660|DHB4_MOUSE	168	168	6.62354e-17	1.25521e-09	0	0
302	24441	HCD	949.93	0	2.63435	2	K	NTATVLDSDGSYFMYSK	L	sp|P01864|GCAB_MOUSE	111	88	7.1974e-17	1.37825e-09	0	0
303	16935	HCD	744.356	0	2.04994	2	R	TTPSYVAFTDTER	L	sp|P17879|HS71B_MOUSE	139	130	7.439e-17	1.40975e-09	0	0
304	25002	HCD	652.025	0	-1.31052	3	R	VAPEEHPVLLTEAPLNPK	A	sp|P60710|ACTB_MOUSE	87	76	7.44787e-17	1.42927e-09	0	0
305	19034	HCD	715.03	1	5.32429	3	R	IADQC+57.021PSSLAIQENANALAR	Y	sp|Q91Y97|ALDOB_MOUSE	162	123	7.48182e-17	1.44144e-09	0	0
306	8435	HCD	506.24	0	0.843961	3	K	QEYDESGPSIVHR	K	sp|P60710|ACTB_MOUSE	87	86	7.58917e-17	1.43821e-09	0	0
307	8440	HCD	489.56	1	-8.12861	3	K	SYC+57.021AEIAHNVSSK	N	sp|P62911|RL32_MOUSE	132	122	7.98367e-17	1.51297e-09	0	0
308	15850	HCD	800.9	1	2.09836	2	K	ELEEQLGPVAEETR	A	sp|P08226|APOE_MOUSE	105	100	8.0286e-17	1.52601e-09	0	0
309	22073	HCD	890.4	0	-2.53627	2	K	LISWYDNEYGYSNR	V	sp|P16858|G3P_MOUSE	117	105	8.04763e-17	1.52962e-09	0	0
310	15534	HCD	796.87	1	-3.33259	2	R	QNGVLNSWTDQDSK	D	sp|P01837|IGKC_MOUSE	96	89	8.74565e-17	1.6623e-09	0	0
311	34826	HCD	776.73	1	-4.218	3	K	GYFPEPVTVKWNYGALSSGVR	T	sp|P03987|IGHG3_MOUSE	96	66	8.87222e-17	1.71243e-09	0	0
312	10463	HCD	649.651	0	1.31531	3	R	FNSVVTNPQGHYNPSTGK	F	sp|Q02105|C1QC_MOUSE	97	81	9.4464e-17	1.8128e-09	0	0
313	35094	HCD	547.29	0	-15.1668	3	K	SLNDKFASFIDKVR	F	sp|P04104|K2C1_MOUSE	108	104	1.01909e-16	1.937e-09	0	0
314	6829	HCD	603.307	0	1.31518	3	R	VRPASSAASVYAGAGGSGSR	I	sp|P05784|K1C18_MOUSE	120	98	1.02628e-16	1.97722e-09	0	0
315	23445	HCD	734.044	0	-1.57983	3	R	VVSALPIQHQDWMSGKEFK	C	sp|P01865|GCAM_MOUSE	104	73	1.06845e-16	2.05453e-09	0	0
316	34578	HCD	819.94	0	-14.3664	2	K	SLNNKFASFIDKVR	F	sp|P11679|K2C8_MOUSE	109	101	1.10157e-16	2.09377e-09	0	0
317	12887	HCD	677.869	0	-1.35059	2	R	ALGQNPTNAEVLK	V	sp|Q60605|MYL6_MOUSE	121	121	1.13681e-16	2.15434e-09	0	0
318	22780	HCD	557.28	0	11.1715	3	K	LSIEYDSEPFGKER	D	sp|P97784|CRY1_MOUSE	110	99	1.13985e-16	2.16653e-09	0	0
319	18882	HCD	714.396	0	-0.768924	2	R	VGVPTETGALTLNR	L	sp|Q8BWT1|THIM_MOUSE	156	149	1.1735e-16	2.23049e-09	0	0
320	33957	HCD	858.484	0	-5.33221	2	K	LLIYLASNLESGVPAR	F	sp|P01662|KV3AA_MOUSE	110	101	1.18534e-16	2.26466e-09	0	0
321	19204	HCD	607.625	0	0.100449	3	R	EFFYTAATNNPRFDK	M	sp|P97784|CRY1_MOUSE	123	96	1.19261e-16	2.27291e-09	0	0
322	17070	HCD	578.346	0	-0.211068	2	R	VVLVTGAGGGLGR	A	sp|P51660|DHB4_MOUSE	157	157	1.22341e-16	2.31845e-09	0	0
323	7233	HCD	564.268	0	-0.649001	3	R	NKANDYTTEYSASVK	G	sp|P01788|HVM19_MOUSE	104	93	1.22392e-16	2.3326e-09	0	0
324	8362	HCD	562.26	0	-1.08553	3	K	HTGPNSPDTANDGFVR	L	sp|O35737|HNRH1_MOUSE	102	92	1.32036e-16	2.52261e-09	0	0
325	7920	HCD	474.91	0	0.128519	3	R	IIAC+57.021DGGGGALGHPK	V	sp|P52503|NDUS6_MOUSE	95	84	1.32273e-16	2.52091e-09	0	0
326	11367	HCD	442.23	0	0.138017	4	R	TSHAAPAATSGFVGAVGHK	L	sp|P51660|DHB4_MOUSE	75	63	1.42612e-16	2.7423e-09	0	0
327	19990	HCD	528.64	1	-2.73288	3	K	LVRPPVQVYGIEGR	Y	sp|Q9DB20|ATPO_MOUSE	106	104	1.48527e-16	2.82308e-09	0	0
328	12169	HCD	465.249	0	-0.655941	3	R	TNAENEFVTIKK	D	sp|P04104|K2C1_MOUSE	163	163	1.49083e-16	2.81584e-09	0	0
329	6978	HCD	440.546	0	-2.42452	3	R	EVEMDAVGKEGR	V	sp|Q8C196|CPSM_MOUSE	97	97	1.52236e-16	2.87539e-09	0	0
330	8595	HCD	846.365	0	-1.22594	2	K	STAGDTHLGGEDFDNR	M	sp|P17156|HSP72_MOUSE	140	124	1.53791e-16	2.93827e-09	0	0
331	14986	HCD	798.069	0	1.75901	3	R	SAVPPGADKKAEAGAGSATEFQFR	G	sp|P63325|RS10_MOUSE	158	107	1.5444e-16	2.99594e-09	0	0
332	21776	HCD	684.35	0	0.713497	3	R	LHDNPALKEC+57.021IQGADTIR	C	sp|P97784|CRY1_MOUSE	122	99	1.5765e-16	3.02536e-09	0	0
333	25323	HCD	895.95	0	0.476864	2	K	SYELPDGQVITIGNER	F	sp|P60710|ACTB_MOUSE	130	115	1.58183e-16	3.02218e-09	0	0
334	9609	HCD	478.58	0	1.65794	3	K	ASLENSLEETKGR	Y	sp|Q9Z2K1|K1C16_MOUSE	163	163	1.70406e-16	3.22933e-09	0	0
335	16870	HCD	470.915	0	0.972073	3	R	TTAENEFVMLKK	D	sp|Q922U2|K2C5_MOUSE	108	108	1.74512e-16	3.29613e-09	0	0
336	16501	HCD	495.296	0	-0.492919	3	R	VLEKVTLVSAAPEK	L	sp|Q9CQR4|ACO13_MOUSE	117	113	1.98963e-16	3.78172e-09	0	0
337	15087	HCD	727.832	0	-0.335435	2	R	NVETMNYADIER	T	sp|Q9D2G2|ODO2_MOUSE	167	165	2.03052e-16	3.8352e-09	0	0
338	13783	HCD	434.9	0	-12.0693	3	K	GSSAADKVVAEIR	R	sp|P51660|DHB4_MOUSE	110	110	2.13785e-16	4.0514e-09	0	0
339	14164	HCD	738.395	0	-1.32255	2	R	FLEQQNQVLQTK	W	sp|Q6IFZ6|K2C1B_MOUSE	143	143	2.1711e-16	4.10072e-09	0	0
340	33755	HCD	954.487	1	-5.28725	3	K	TTPPSVYPLAPGSAAQTNSMVTLGC+57.021LVK	G	sp|P01869|IGH1M_MOUSE	185	97	2.22312e-16	4.33878e-09	0	0
341	25106	HCD	661.67	1	-2.92147	3	K	TVTNAVVTVPAYFNDSQR	Q	sp|P63017|HSP7C_MOUSE	115	94	2.249e-16	4.31592e-09	0	0
342	22981	HCD	914.47	0	7.07489	2	R	APQVYVLPPPEEEMTK	K	sp|P01865|GCAM_MOUSE	155	128	2.25414e-16	4.30666e-09	0	0
343	14023	HCD	738.9	1	2.7705	2	R	FLEQQNQVLQTK	W	sp|Q6IFZ6|K2C1B_MOUSE	127	126	2.37165e-16	4.47951e-09	0	0
344	20621	HCD	850.41	1	-3.27802	3	R	TPC+57.021TVSC+57.021NIPVVSGKEC+57.021EEIIR	K	sp|Q8K0E8|FIBB_MOUSE	157	87	2.4279e-16	4.69428e-09	0	0
345	31174	HCD	734.044	0	-2.07873	3	R	VVSALPIQHQDWMSGKEFK	C	sp|P01865|GCAM_MOUSE	103	71	2.56168e-16	4.92588e-09	0	0
346	20192	HCD	756.867	0	1.45155	2	K	SILEGSDEYLVC+57.021K	I	sp|P01872|IGHM_MOUSE	164	161	2.56643e-16	4.86359e-09	0	0
347	21363	HCD	643.35	1	-6.04213	3	K	ALHGEQYLELYKPLPR	S	sp|P51660|DHB4_MOUSE	128	116	2.81112e-16	5.37079e-09	0	0
348	12993	HCD	710.85	0	0.858623	2	K	GLNSDSVTEETLR	K	sp|Q8C196|CPSM_MOUSE	161	161	2.83328e-16	5.36929e-09	0	0
349	24809	HCD	652.36	1	-1.18463	3	R	VAPEEHPVLLTEAPLNPK	A	sp|P60710|ACTB_MOUSE	98	80	2.87247e-16	5.51238e-09	0	0
350	12681	HCD	685.376	0	0.890536	2	R	GAAQNIIPASTGAAK	A	sp|P16858|G3P_MOUSE	125	118	2.90041e-16	5.5277e-09	0	0
351	29082	HCD	842.95	0	-7.31301	2	R	AAVEEGIVLGGGC+57.021ALLR	C	sp|P63038|CH60_MOUSE	141	130	2.96984e-16	5.68704e-09	0	0
352	27307	HCD	844.97	1	-5.02194	2	K	LLIYAASNLESGIPAR	F	sp|P01665|KV3AD_MOUSE	168	150	3.00211e-16	5.73569e-09	0	0
353	7733	HCD	485.264	0	1.57222	3	K	SGEVLVNVKEHSR	Q	sp|Q9QZD9|EIF3I_MOUSE	144	142	3.13827e-16	5.94727e-09	0	0
354	9203	HCD	528.973	0	-1.49999	3	K	GVPVKVTNIKDGTTR	T	sp|P16460|ASSY_MOUSE	144	126	3.15481e-16	6.01254e-09	0	0
355	14513	HCD	738.89	0	2.31291	2	R	FLEQQNQVLETK	W	sp|Q6IME9|K2C72_MOUSE	125	125	3.20497e-16	6.05347e-09	0	0
356	16912	HCD	716.33	1	-8.75078	3	R	GQYC+57.021YELDETAVRPGYPK	L	sp|P29788|VTNC_MOUSE	157	109	3.29698e-16	6.32703e-09	0	0
357	16374	HCD	734.9	1	-4.11245	2	R	AQTPQVYTIPPPR	E	sp|P03987|IGHG3_MOUSE	103	98	3.36782e-16	6.38227e-09	0	0
358	3568	HCD	563.608	0	1.29952	3	R	VSTVTTHSSDSEVPSR	V	sp|Q06890|CLUS_MOUSE	64	57	3.52988e-16	6.74403e-09	0	0
359	11151	HCD	597.78	0	-2.96098	2	K	AAGC+57.021DFNNVVK	T	sp|P52760|UK114_MOUSE	103	103	3.58011e-16	6.73659e-09	0	0
360	11580	HCD	710.342	1	-14.7446	2	R	C+57.021TGGEVGATSALAPK	I	sp|P35979|RL12_MOUSE	168	144	3.66934e-16	6.99316e-09	0	0
361	15284	HCD	491.95	0	5.64512	3	R	AGVNTVTTLVENKK	A	sp|P12970|RL7A_MOUSE	118	112	3.70908e-16	7.04989e-09	0	0
362	18902	HCD	632.812	0	-0.289352	2	R	FADGDVDAVLSR	A	sp|Q8R0Y6|AL1L1_MOUSE	147	147	3.81226e-16	7.20051e-09	0	0
363	38145	HCD	914.52	1	-6.24243	2	R	GC+57.021IVDANLSVLNLVIVK	K	sp|P62754|RS6_MOUSE	83	71	3.87144e-16	7.41355e-09	0	0
364	18066	HCD	774.37	0	-0.630553	2	R	AEAEAQAEELSFPR	S	sp|Q05920|PYC_MOUSE	97	94	3.92517e-16	7.46062e-09	0	0
365	15410	HCD	600.319	1	-10.4428	3	K	APQVYTIPPPKEQMAK	D	sp|P01869|IGH1M_MOUSE	149	120	3.9661e-16	7.57746e-09	0	0
366	24040	HCD	662.01	1	-3.10446	3	R	TIAQDYGVLKADEGISFR	G	sp|P35700|PRDX1_MOUSE	133	100	4.09131e-16	7.85136e-09	0	0
367	14935	HCD	899.483	0	1.15355	2	K	APQVYTIPPPKEQMAK	D	sp|P01869|IGH1M_MOUSE	177	139	4.12006e-16	7.8716e-09	0	0
368	11100	HCD	644.58	1	-6.5116	4	K	VGGTSDVEVNEKKDRVTDALNATR	A	sp|P63038|CH60_MOUSE	218	124	4.15031e-16	8.05109e-09	0	0
369	5278	HCD	451.226	0	-1.01449	4	K	HIAEDADRKYEEVAR	K	sp|P58771|TPM1_MOUSE	127	113	4.24558e-16	8.09137e-09	0	0
370	33942	HCD	497.28	0	-7.97791	3	R	AQFEGIVTDLIKR	T	sp|P38647|GRP75_MOUSE	130	128	4.27816e-16	8.10744e-09	0	0
371	11505	HCD	757.368	0	-0.161177	2	R	YLQEIYNSNNQK	I	sp|Q8VCM7|FIBG_MOUSE	113	113	4.29308e-16	8.10866e-09	0	0
372	15394	HCD	750.35	0	-3.33502	3	K	IDGSERQNGVLNSWTDQDSK	D	sp|P01837|IGKC_MOUSE	94	74	4.48952e-16	8.6495e-09	0	0
373	20333	HCD	783.896	0	3.73735	2	R	ITPSYVAFTPEGER	L	sp|P20029|GRP78_MOUSE	147	124	4.53677e-16	8.6231e-09	0	0
374	9452	HCD	683.773	0	-0.535573	2	K	SEDTAMYYC+57.021AR	-	sp|P18525|HVM54_MOUSE	148	147	4.65808e-16	8.76497e-09	0	0
375	7018	HCD	465.581	0	0.131095	3	R	VVANSKESYELR	Y	sp|P67984|RL22_MOUSE	138	138	4.67582e-16	8.83158e-09	0	0
376	4716	HCD	616.051	1	-6.81327	4	R	SSAGTGLSSGKRPSQEEDAQSVGPK	V	sp|P97784|CRY1_MOUSE	245	134	4.9172e-16	9.55384e-09	0	0
377	5881	HCD	411.955	0	-0.22224	4	K	QEYDESGPSIVHRK	C	sp|P60710|ACTB_MOUSE	123	114	4.98003e-16	9.4656e-09	0	0
378	15688	HCD	520.6	0	-9.26188	3	K	C+57.021RVNSAAFPAPIEK	T	sp|P01869|IGH1M_MOUSE	105	100	4.99004e-16	9.48462e-09	0	0
379	12678	HCD	584.289	0	0.208921	3	K	TAPFDSRFPNQNQTK	N	sp|P56391|CX6B1_MOUSE	118	98	4.99999e-16	9.52915e-09	0	0
380	7362	HCD	431.898	0	0.494614	3	R	GNYVAEKISGQK	V	sp|O35490|BHMT1_MOUSE	108	106	5.09925e-16	9.63134e-09	0	0
381	5873	HCD	476.733	0	-2.04844	4	R	NKANDYTTEYSASVKGR	F	sp|P01788|HVM19_MOUSE	98	86	5.11984e-16	9.80417e-09	0	0
382	17991	HCD	650.843	0	0.937786	2	R	VYGTGSLALYEK	A	sp|Q91VR2|ATPG_MOUSE	109	109	5.24478e-16	9.90622e-09	0	0
383	9508	HCD	632.32	0	-0.772206	2	K	YASNLESGVPAR	F	sp|P01674|KV3AM_MOUSE	165	165	5.29687e-16	1.00046e-08	0	0
384	35456	HCD	975.14	1	0.0215902	3	R	DC+57.021GC+57.021KPC+57.021IC+57.021TVPEVSSVFIFPPKPK	D	sp|P01869|IGH1M_MOUSE	114	61	5.64244e-16	1.09629e-08	0	0
385	17144	HCD	622.34	0	2.94222	2	R	VNSAAFPAPIEK	T	sp|P01869|IGH1M_MOUSE	153	153	5.71814e-16	1.08003e-08	0	0
386	23613	HCD	640.35	0	2.66884	2	K	TLAFASVDLTNK	T	sp|Q9CQR4|ACO13_MOUSE	137	137	5.95665e-16	1.12508e-08	0	0
387	20561	HCD	753.893	0	-0.566719	2	K	ISSLLEEQFQQGK	L	sp|P62242|RS8_MOUSE	155	154	6.15701e-16	1.1668e-08	0	0
388	15174	HCD	695.85	0	8.50824	2	K	QSLEASLAETEGR	Y	sp|P02535|K1C10_MOUSE	142	142	6.18023e-16	1.1712e-08	0	0
389	4648	HCD	541.015	0	2.03069	4	R	HNSYTC+57.021EATHKTSTSPIVK	S	sp|P01837|IGKC_MOUSE	67	51	6.2001e-16	1.19223e-08	0	0
390	28608	HCD	983.88	1	-6.99091	3	R	VRKEEREQIKTLNNKFASFIDKVR	F	sp|Q8BGZ7|K2C75_MOUSE	214	124	6.28609e-16	1.21943e-08	0	0
391	11864	HCD	480.624	0	0.571461	3	R	VLLGETGKEKLPR	Y	sp|P62281|RS11_MOUSE	154	145	6.37562e-16	1.20823e-08	0	0
392	15503	HCD	647.823	0	-3.20333	2	K	DFTPAAQAAFQK	V	sp|P02089|HBB2_MOUSE	118	114	6.44554e-16	1.21742e-08	0	0
393	16655	HCD	455.59	1	-4.31096	3	K	ITVTSEVPFSKR	Y	sp|P67984|RL22_MOUSE	123	123	6.49565e-16	1.22688e-08	0	0
394	16721	HCD	455.25	0	-16.4903	3	K	ITVTSEVPFSKR	Y	sp|P67984|RL22_MOUSE	142	142	6.49565e-16	1.22688e-08	0	0
395	15720	HCD	998.04	1	-11.2264	2	-	EVQLQQSGPELVKPGASVK	M	sp|P01756|HVM12_MOUSE	124	98	6.51634e-16	1.25304e-08	0	0
396	15141	HCD	553.59	0	-6.0639	3	R	SDEDYLYREELAR	F	sp|P37040|NCPR_MOUSE	110	104	6.60884e-16	1.25243e-08	0	0
397	9919	HCD	736.32	0	1.57495	2	K	SEGTYC+57.021C+57.021GPVSVR	A	sp|P21981|TGM2_MOUSE	87	81	6.72553e-16	1.27454e-08	0	0
398	23012	HCD	695.36	0	5.61763	2	R	GYISPYFINTSK	G	sp|P63038|CH60_MOUSE	117	114	6.80101e-16	1.28456e-08	0	0
399	17031	HCD	692.845	0	4.05232	2	K	YSGC+57.021LTESNLIK	V	sp|P21981|TGM2_MOUSE	158	158	6.83145e-16	1.29031e-08	0	0
400	6342	HCD	470.908	0	0.77767	3	R	GFSSGSAVVSGGSRR	S	sp|Q3TTY5|K22E_MOUSE	171	147	6.9992e-16	1.33393e-08	0	0
401	8095	HCD	715.868	0	-1.2789	2	K	VLGNPKSDEMNVK	V	sp|Q60605|MYL6_MOUSE	80	77	7.12547e-16	1.35033e-08	0	0
402	34597	HCD	793.38	1	1.71291	4	R	AGSNVMQTFTFYASEDKLENRGNYVAEK	I	sp|O35490|BHMT1_MOUSE	139	86	7.30735e-16	1.42615e-08	0	0
403	3854	HCD	552.507	0	0.773287	4	R	NSYSC+57.021SVVHEGLHNHHTTK	S	sp|P01865|GCAM_MOUSE	102	74	7.95828e-16	1.53031e-08	0	0
404	16891	HCD	567.959	0	1.61196	3	K	IMGTSPLQIDRAEDR	S	sp|Q8C196|CPSM_MOUSE	138	116	8.14566e-16	1.55243e-08	0	0
405	15094	HCD	669.31	0	-9.93974	2	R	YALYDATYETK	E	sp|P18760|COF1_MOUSE	134	134	8.29417e-16	1.56069e-08	0	0
406	10366	HCD	436.254	0	-0.839444	3	R	TFGGGTKLEIKR	-	sp|P01645|KV5AC_MOUSE	152	152	8.36182e-16	1.57936e-08	0	0
407	34296	HCD	793.38	1	1.71291	4	R	AGSNVMQTFTFYASEDKLENRGNYVAEK	I	sp|O35490|BHMT1_MOUSE	159	81	8.44219e-16	1.64763e-08	0	0
408	10231	HCD	706.84	0	0.0863493	2	R	YLESC+57.021NIPSTTK	R	sp|O35973|PER1_MOUSE	109	108	8.69477e-16	1.64225e-08	0	0
409	20525	HCD	555.3	0	3.18751	3	R	WIYDTSKLASGVPAR	F	sp|P04940|KV6A6_MOUSE	148	125	8.94766e-16	1.70528e-08	0	0
410	10077	HCD	539.27	0	19.128	3	K	TGTITTFEHAHNMR	V	sp|P58252|EF2_MOUSE	105	92	8.99925e-16	1.7105e-08	0	0
411	12402	HCD	587.63	0	1.14253	3	K	KVTISC+57.021TASESLYSSK	H	sp|P01632|KV1A1_MOUSE	108	96	9.28392e-16	1.77374e-08	0	0
412	20122	HCD	757.36	1	-10.3611	2	K	SILEGSDEYLVC+57.021K	I	sp|P01872|IGHM_MOUSE	130	125	9.53644e-16	1.80723e-08	0	0
413	15830	HCD	467.56	0	-8.94189	3	K	YC+57.021FPNYVGRPK	H	sp|Q8R5C5|ACTY_MOUSE	61	59	9.64598e-16	1.81505e-08	0	0
414	37472	HCD	592.51	1	-2.55483	5	R	KRNEDEDSPNKLYTLVTYVPVTTFK	N	sp|P62900|RL31_MOUSE	142	75	9.80439e-16	1.90493e-08	0	0
415	7032	HCD	660.316	0	-1.6638	2	R	EVEMDAVGKEGR	V	sp|Q8C196|CPSM_MOUSE	109	109	9.94487e-16	1.87836e-08	0	0
416	4696	HCD	475.242	0	-0.321074	3	R	ATAPQTQHVSPMR	Q	sp|P57776|EF1D_MOUSE	109	98	1.01445e-15	1.92246e-08	0	0
417	18305	HCD	725.864	0	2.77485	2	R	TTPSVVAFTADGER	L	sp|P38647|GRP75_MOUSE	125	107	1.02868e-15	1.95522e-08	0	0
418	21767	HCD	774.43	1	1.14489	2	K	VLEQLTGQTPVFSK	A	sp|Q9CXW4|RL11_MOUSE	120	115	1.06002e-15	2.0148e-08	0	0
419	8833	HCD	576.272	0	0.953226	4	K	YNISREDC+57.021DRYALQSQQR	W	sp|Q8BWT1|THIM_MOUSE	121	88	1.08863e-15	2.08911e-08	0	0
420	10492	HCD	765.371	0	0.637967	2	K	IGGHGAEYGAEALER	M	sp|P01942|HBA_MOUSE	138	117	1.18944e-15	2.26688e-08	0	0
421	16698	HCD	839.91	1	0.837443	2	K	NQLTSNPENTVFDAK	R	sp|P20029|GRP78_MOUSE	91	77	1.23261e-15	2.34915e-08	0	0
422	17223	HCD	715.84	0	1.96107	2	R	EFFYTAATNNPR	F	sp|P97784|CRY1_MOUSE	90	88	1.25436e-15	2.36921e-08	0	0
423	16562	HCD	734.404	0	3.90611	2	R	AQTPQVYTIPPPR	E	sp|P03987|IGHG3_MOUSE	95	88	1.29215e-15	2.44872e-08	0	0
424	6164	HCD	418.883	0	1.01997	3	R	GPTIKPC+57.021PPC+57.021K	C	sp|P01865|GCAM_MOUSE	137	137	1.30237e-15	2.45064e-08	0	0
425	21075	HCD	721.89	1	3.34348	2	K	EGPSLTSPAQVLSR	L	sp|Q8VC30|TKFC_MOUSE	154	147	1.4345e-15	2.72657e-08	0	0
426	32384	HCD	732.37	1	-2.05568	3	R	GFPAKYIYDPWNAPEGIQK	V	sp|P97784|CRY1_MOUSE	90	65	1.45806e-15	2.80372e-08	0	0
427	9866	HCD	510.232	0	-1.37565	3	K	WEKTDSFSC+57.021NVR	H	sp|P01867|IGG2B_MOUSE	83	79	1.46885e-15	2.77433e-08	0	0
428	14853	HCD	574.954	0	0.106157	3	R	VFDKEGNGTVMGAEIR	H	sp|Q60605|MYL6_MOUSE	111	90	1.49583e-15	2.85786e-08	0	0
429	14853	HCD	574.954	0	0.106157	3	R	VFDKEGNGTVMGAELR	H	sp|P09542|MYL3_MOUSE	111	90	1.49583e-15	2.85786e-08	0	0
430	20654	HCD	850.08	0	2.01038	3	R	TPC+57.021TVSC+57.021NIPVVSGKEC+57.021EEIIR	K	sp|Q8K0E8|FIBB_MOUSE	179	95	1.49606e-15	2.8926e-08	0	0
431	18827	HCD	557.27	0	-6.79052	3	K	LSIEYDSEPFGKER	D	sp|P97784|CRY1_MOUSE	109	88	1.51167e-15	2.87326e-08	0	0
432	8101	HCD	627.807	0	-1.26385	2	R	GFSSGSAVVSGGSR	R	sp|Q3TTY5|K22E_MOUSE	161	149	1.52179e-15	2.89249e-08	0	0
433	17503	HCD	553.96	0	-4.73771	3	R	VLAAC+57.021LTEKGAEELR	N	sp|Q9R092|H17B6_MOUSE	145	120	1.57344e-15	2.99871e-08	0	0
434	13006	HCD	653.329	0	-2.6158	2	R	AQIFANSVDNAR	I	sp|P05784|K1C18_MOUSE	135	129	1.57593e-15	2.97659e-08	0	0
435	3966	HCD	736.668	1	-8.59197	3	R	NSYSC+57.021SVVHEGLHNHHTTK	S	sp|P01865|GCAM_MOUSE	146	88	1.5836e-15	3.04512e-08	0	0
436	8077	HCD	789.898	0	0.463619	2	K	ALAAAGYDVEKNNSR	I	sp|P43277|H13_MOUSE	121	105	1.58513e-15	3.021e-08	0	0
437	20338	HCD	553.288	0	-0.882507	3	K	IVLRLEC+57.021VEPNC+57.021R	S	sp|P83882|RL36A_MOUSE	136	119	1.59614e-15	3.02481e-08	0	0
438	9370	HCD	544.939	1	-11.0564	3	K	ISGQKVNEAAC+57.021DIAR	Q	sp|O35490|BHMT1_MOUSE	129	109	1.65319e-15	3.15071e-08	0	0
439	24261	HCD	640.36	0	18.3006	2	K	TLAFASVDLTNK	T	sp|Q9CQR4|ACO13_MOUSE	119	117	1.65532e-15	3.12652e-08	0	0
440	23789	HCD	640.346	0	-3.43136	2	K	TLAFASVDLTNK	T	sp|Q9CQR4|ACO13_MOUSE	155	154	1.65532e-15	3.12652e-08	0	0
441	4356	HCD	721.017	0	1.26977	3	R	HNSYTC+57.021EATHKTSTSPIVK	S	sp|P01837|IGKC_MOUSE	126	85	1.70503e-15	3.27862e-08	0	0
442	12815	HCD	616.8	1	-4.90051	2	K	VVSPWNSEDAK	G	sp|Q9D051|ODPB_MOUSE	127	121	1.70673e-15	3.21151e-08	0	0
443	7589	HCD	624.804	0	1.07456	2	R	VIGSGC+57.021NLDSAR	F	sp|P00342|LDHC_MOUSE	141	140	1.70687e-15	3.2239e-08	0	0
444	16983	HCD	549.95	0	4.99426	3	R	FVRLPVADSEAC+57.021QR	W	sp|Q8CG16|C1RA_MOUSE	89	76	1.72851e-15	3.28541e-08	0	0
445	23688	HCD	697.36	1	-15.1069	2	K	AFAMTNQILVER	S	sp|Q8C196|CPSM_MOUSE	155	151	1.78406e-15	3.3697e-08	0	0
446	18895	HCD	581.62	0	3.98773	3	R	YLAEKYEWDVAEAR	K	sp|P58252|EF2_MOUSE	79	71	1.80938e-15	3.4391e-08	0	0
447	16029	HCD	580.97	1	6.34336	3	R	NAASFKEVSDGVLTSSK	G	sp|P43883|PLIN2_MOUSE	116	90	1.89195e-15	3.62297e-08	0	0
448	21083	HCD	553.65	0	7.93744	3	K	VVEIAPATHLDPQLR	S	sp|Q05920|PYC_MOUSE	92	80	1.92806e-15	3.67457e-08	0	0
449	21908	HCD	890.91	1	6.75314	2	K	LISWYDNEYGYSNR	V	sp|P16858|G3P_MOUSE	94	79	1.97186e-15	3.74794e-08	0	0
450	14182	HCD	661.838	0	-1.01443	2	R	DATSLNQAALYR	L	sp|P51660|DHB4_MOUSE	154	151	2.00799e-15	3.79264e-08	0	0
451	5706	HCD	530	1	-2.50493	4	K	TTHFVEGGDAGNREDQINR	L	sp|P14148|RL7_MOUSE	134	106	2.0873e-15	4.0137e-08	0	0
452	35952	HCD	835.42	1	5.43378	3	K	TNC+57.021DLYEKLGEYGFQNAILVR	Y	sp|P07724|ALBU_MOUSE	75	40	2.09688e-15	4.04721e-08	0	0
453	11371	HCD	589.3	0	-7.14644	3	R	TSHAAPAATSGFVGAVGHK	L	sp|P51660|DHB4_MOUSE	90	75	2.14989e-15	4.13406e-08	0	0
454	15250	HCD	608.332	0	-1.00332	2	K	NAGVEGSLIVEK	I	sp|P63038|CH60_MOUSE	138	138	2.18154e-15	4.12044e-08	0	0
455	34327	HCD	820.467	1	16.4148	2	K	SLNNKFASFIDKVR	F	sp|P11679|K2C8_MOUSE	94	76	2.20819e-15	4.19714e-08	0	0
456	21609	HCD	684.35	0	0.713497	3	R	LHDNPALKEC+57.021IQGADTIR	C	sp|P97784|CRY1_MOUSE	118	85	2.22484e-15	4.26954e-08	0	0
457	16394	HCD	687.83	1	-1.73008	2	K	SC+57.021AVAEYGVYVR	A	sp|Q61646|HPT_MOUSE	148	136	2.23066e-15	4.21321e-08	0	0
458	12985	HCD	453.245	0	2.42393	3	R	QSVEADINGLRR	V	sp|P02535|K1C10_MOUSE	151	151	2.26215e-15	4.27269e-08	0	0
459	34337	HCD	793.13	0	2.77038	4	R	AGSNVMQTFTFYASEDKLENRGNYVAEK	I	sp|O35490|BHMT1_MOUSE	142	74	2.3081e-15	4.50463e-08	0	0
460	10401	HCD	516.933	0	-1.53493	3	K	GLNSDSVTEETLRK	A	sp|Q8C196|CPSM_MOUSE	139	119	2.32013e-15	4.4099e-08	0	0
461	11728	HCD	651.322	0	-0.655967	2	R	ISVYYNEATGGK	Y	sp|P99024|TBB5_MOUSE	111	96	2.324e-15	4.38951e-08	0	0
462	12742	HCD	440.25	0	-13.5863	4	K	TVVNKDVFRDPALKR	K	sp|P61358|RL27_MOUSE	136	107	2.36007e-15	4.4979e-08	0	0
463	15130	HCD	643.37	0	8.06384	2	K	AINQGGLTSVAVR	G	sp|Q9QUM9|PSA6_MOUSE	109	103	2.38037e-15	4.51099e-08	0	0
464	16537	HCD	458.94	0	7.51408	3	K	TLLKDTTVTGLGR	G	sp|Q8BMS1|ECHA_MOUSE	118	110	2.41943e-15	4.585e-08	0	0
465	37613	HCD	787.67	1	6.22112	4	R	GPTIKPC+57.021PPC+57.021KC+57.021PAPNLLGGPSVFIFPPK	I	sp|P01865|GCAM_MOUSE	213	102	2.42528e-15	4.74007e-08	0	0
466	22944	HCD	708.89	0	4.2189	2	R	LLLGPC+57.021TPVQYR	L	sp|P97872|FMO5_MOUSE	114	110	2.46125e-15	4.64875e-08	0	0
467	22654	HCD	860.46	1	1.31425	2	R	IIDVVYNASNNELVR	T	sp|P62242|RS8_MOUSE	136	116	2.52244e-15	4.80736e-08	0	0
468	19738	HCD	628.865	0	0.873506	2	K	LATEAGVEVIVR	I	sp|P97784|CRY1_MOUSE	178	178	2.53466e-15	4.7874e-08	0	0
469	20028	HCD	628.87	0	9.41445	2	K	LATEAGVEVIVR	I	sp|P97784|CRY1_MOUSE	140	140	2.53466e-15	4.7874e-08	0	0
470	20574	HCD	628.86	0	-6.50277	2	K	LATEAGVEVIVR	I	sp|P97784|CRY1_MOUSE	171	171	2.53466e-15	4.7874e-08	0	0
471	20768	HCD	628.86	0	-6.50277	2	K	LATEAGVEVIVR	I	sp|P97784|CRY1_MOUSE	136	136	2.53466e-15	4.7874e-08	0	0
472	20207	HCD	628.865	0	1.45584	2	K	LATEAGVEVIVR	I	sp|P97784|CRY1_MOUSE	156	156	2.53466e-15	4.7874e-08	0	0
473	20387	HCD	628.865	0	0.679393	2	K	LATEAGVEVIVR	I	sp|P97784|CRY1_MOUSE	158	158	2.53466e-15	4.7874e-08	0	0
474	16413	HCD	721.34	0	1.43843	2	K	AEAGAGSATEFQFR	G	sp|P63325|RS10_MOUSE	101	88	2.58859e-15	4.92015e-08	0	0
475	21348	HCD	621.84	0	3.14089	2	K	NIEDVIAQGVGK	L	sp|P99027|RLA2_MOUSE	136	132	2.5918e-15	4.89534e-08	0	0
476	10889	HCD	621.3	0	1.96476	2	R	YSTDVSVDEVK	A	sp|P26443|DHE3_MOUSE	119	119	2.59213e-15	4.87753e-08	0	0
477	6203	HCD	627.819	0	-1.26383	2	R	GPTIKPC+57.021PPC+57.021K	C	sp|P01865|GCAM_MOUSE	146	146	2.60475e-15	4.90127e-08	0	0
478	6576	HCD	544.25	0	9.19601	3	K	HSGPNSADSANDGFVR	L	sp|Q9Z2X1|HNRPF_MOUSE	89	78	2.61413e-15	4.99444e-08	0	0
479	34827	HCD	820.43	0	-16.8128	2	K	SLNDKFASFIDKVR	F	sp|P04104|K2C1_MOUSE	103	88	2.66527e-15	5.06591e-08	0	0
480	26811	HCD	740.9	1	-4.07912	2	K	LGEYGFQNAILVR	Y	sp|P07724|ALBU_MOUSE	87	78	2.68562e-15	5.08946e-08	0	0
481	13983	HCD	628.3	1	-3.66777	4	R	HQEGEIFDTEKEKYEITEQR	K	sp|P47911|RL6_MOUSE	145	91	2.75624e-15	5.31016e-08	0	0
482	12207	HCD	697.37	0	0.350088	2	R	TNAENEFVTIKK	D	sp|P04104|K2C1_MOUSE	114	108	2.85442e-15	5.39137e-08	0	0
483	19770	HCD	518.631	0	1.41222	3	R	IDVVVNNAGILRDR	S	sp|P51660|DHB4_MOUSE	131	118	2.85602e-15	5.42847e-08	0	0
484	12153	HCD	806.71	1	-8.52688	3	K	IVRGDQPGASGDNDDDEPPPLPR	L	sp|O55022|PGRC1_MOUSE	138	99	2.91682e-15	5.6491e-08	0	0
485	7921	HCD	627.808	0	1.06942	2	R	GFSSGSAVVSGGSR	R	sp|Q3TTY5|K22E_MOUSE	138	118	2.9664e-15	5.63827e-08	0	0
486	19113	HCD	614.844	0	2.2832	2	K	TSGPPVSELITK	A	sp|P43274|H14_MOUSE	112	112	3.04096e-15	5.74369e-08	0	0
487	13522	HCD	582.789	0	-0.314188	2	K	ATAVMPDGQFK	D	sp|P35700|PRDX1_MOUSE	121	119	3.05342e-15	5.74553e-08	0	0
488	16997	HCD	622.334	0	-6.17866	2	R	VNSAAFPAPIEK	T	sp|P01869|IGH1M_MOUSE	122	119	3.06873e-15	5.79614e-08	0	0
489	21296	HCD	660.381	0	-1.20151	2	K	YLATSQVLLSPK	S	sp|P01872|IGHM_MOUSE	169	164	3.21297e-15	6.06859e-08	0	0
490	14475	HCD	458.589	0	1.19784	3	R	TIRLELQGSNSR	S	sp|P09405|NUCL_MOUSE	86	86	3.27902e-15	6.19333e-08	0	0
491	18065	HCD	617.303	0	-1.08761	2	R	VDTWFNQPAR	K	sp|P47963|RL13_MOUSE	104	104	3.28463e-15	6.15354e-08	0	0
492	11859	HCD	674.795	0	-0.0904499	2	R	SEDTALYYC+57.021AR	L	sp|P01808|HVM38_MOUSE	142	140	3.30799e-15	6.22455e-08	0	0
493	35199	HCD	954.48	1	-12.6435	3	K	TTPPSVYPLAPGSAAQTNSMVTLGC+57.021LVK	G	sp|P01869|IGH1M_MOUSE	153	73	3.32888e-15	6.49684e-08	0	0
494	24942	HCD	626.861	0	-0.292099	2	K	FLASVSTVLTSK	Y	sp|P01942|HBA_MOUSE	161	159	3.37145e-15	6.36792e-08	0	0
495	3410	HCD	595.965	0	-0.51207	3	K	ASMVQSQEAPKQDAPAK	K	sp|Q99PL5|RRBP1_MOUSE	85	66	3.44183e-15	6.59088e-08	0	0
496	14362	HCD	704.34	0	-7.79896	2	K	VYNYNHLMPTR	Y	sp|P61358|RL27_MOUSE	87	84	3.51614e-15	6.61622e-08	0	0
497	11302	HCD	557.622	1	-13.1047	3	K	C+57.021KVNNKDLPSPIER	T	sp|P01867|IGG2B_MOUSE	129	113	3.5522e-15	6.75171e-08	0	0
498	11828	HCD	633.82	0	0.192595	2	K	YASESISGIPSR	F	sp|P01642|KV5A9_MOUSE	145	145	3.63755e-15	6.87051e-08	0	0
499	12000	HCD	633.82	0	0.577784	2	K	YASESISGIPSR	F	sp|P01642|KV5A9_MOUSE	168	168	3.63755e-15	6.87051e-08	0	0
500	19370	HCD	554.99	0	7.69833	3	R	TGGKYLATSQVLLSPK	S	sp|P01872|IGHM_MOUSE	105	93	3.64355e-15	6.9612e-08	0	0
501	16511	HCD	748.36	0	6.93252	2	R	AGGIETIANEYSDR	C	sp|Q61316|HSP74_MOUSE	131	121	3.64985e-15	6.93731e-08	0	0
502	17278	HCD	622.339	0	1.47111	2	R	VNSAAFPAPIEK	T	sp|P01869|IGH1M_MOUSE	129	123	3.67836e-15	6.9476e-08	0	0
503	10960	HCD	675.29	1	-10.7167	2	R	SEDTALYYC+57.021AR	L	sp|P01808|HVM38_MOUSE	138	136	3.74593e-15	7.04861e-08	0	0
504	10824	HCD	691.328	0	0.618008	2	R	ALEESNYELEGK	I	sp|P02535|K1C10_MOUSE	159	159	3.80412e-15	7.18512e-08	0	0
505	33306	HCD	1426.71	1	-6.14038	2	K	TTAPSVYPLAPVC+57.021GDTTGSSVTLGC+57.021LVK	G	sp|P01865|GCAM_MOUSE	180	91	3.83583e-15	7.48625e-08	0	0
506	27564	HCD	901.08	0	-3.04809	3	K	TELNYKNTEPVLDSDGSYFMYSK	L	sp|P01865|GCAM_MOUSE	85	50	3.88512e-15	7.52443e-08	0	0
507	19750	HCD	699.83	0	-8.63414	2	R	ISDEDWDIIHR	V	sp|P51660|DHB4_MOUSE	132	132	4.06148e-15	7.64237e-08	0	0
508	24482	HCD	652.025	0	-1.49773	3	R	VAPEEHPVLLTEAPLNPK	A	sp|P60710|ACTB_MOUSE	90	66	4.37917e-15	8.40378e-08	0	0
509	12533	HCD	633.81	1	-2.16677	2	R	AFDAIESAQSAR	Q	sp|Q8BX70|VP13C_MOUSE	124	120	4.41975e-15	8.34792e-08	0	0
510	22904	HCD	652.676	0	-0.467576	3	R	APQVYVLPPPEEEMTKK	Q	sp|P01865|GCAM_MOUSE	114	86	4.49414e-15	8.60598e-08	0	0
511	37471	HCD	740.39	1	3.23745	4	R	KRNEDEDSPNKLYTLVTYVPVTTFK	N	sp|P62900|RL31_MOUSE	190	93	4.6597e-15	9.05352e-08	0	0
512	21597	HCD	773.929	0	2.28706	2	K	VLEQLTGQTPVFSK	A	sp|Q9CXW4|RL11_MOUSE	96	87	4.73046e-15	8.99125e-08	0	0
513	15169	HCD	890.92	0	-1.23314	2	K	VDATEESDLAQQYGVR	G	sp|P09103|PDIA1_MOUSE	121	107	4.85831e-15	9.28206e-08	0	0
514	11182	HCD	510.498	0	1.73362	4	K	VFANPEDC+57.021AGFGKGENAKK	F	sp|Q91VS7|MGST1_MOUSE	131	86	5.00985e-15	9.63351e-08	0	0
515	7969	HCD	606.65	1	7.28269	3	R	ASGNYATVISHNPETKK	T	sp|P62918|RL8_MOUSE	163	94	5.10462e-15	9.77502e-08	0	0
516	13140	HCD	651.33	0	-4.31057	2	R	ALEEANADLEVK	I	sp|Q6IFX2|K1C42_MOUSE	87	87	5.31607e-15	1.00409e-07	0	0
517	13332	HCD	651.83	1	-6.88593	2	R	ALEEANADLEVK	I	sp|Q6IFX2|K1C42_MOUSE	143	143	5.31607e-15	1.00409e-07	0	0
518	23197	HCD	603.84	1	-16.1334	2	R	AITGIQAFTVGK	-	sp|Q60759|GCDH_MOUSE	86	83	5.4758e-15	1.03426e-07	0	0
519	12873	HCD	405.887	0	-0.375936	3	K	TVDGPSGKLWR	D	sp|P16858|G3P_MOUSE	131	130	5.53069e-15	1.04069e-07	0	0
520	11124	HCD	557.62	1	-16.1713	3	K	C+57.021KVNNKDLPSPIER	T	sp|P01867|IGG2B_MOUSE	116	99	5.71007e-15	1.08532e-07	0	0
521	10732	HCD	651.66	1	0.688277	3	R	AAPTEPPEAPEATAAGGVTSK	Q	sp|Q8VC30|TKFC_MOUSE	114	80	5.76787e-15	1.11326e-07	0	0
522	11174	HCD	573.295	0	-0.319391	2	R	YATALYSAASK	E	sp|Q9DB20|ATPO_MOUSE	148	148	5.8385e-15	1.09861e-07	0	0
523	25187	HCD	652.03	0	5.71011	3	R	VAPEEHPVLLTEAPLNPK	A	sp|P60710|ACTB_MOUSE	90	67	5.88589e-15	1.12952e-07	0	0
524	21138	HCD	660.88	1	-5.77491	2	K	YLATSQVLLSPK	S	sp|P01872|IGHM_MOUSE	106	105	5.93758e-15	1.12148e-07	0	0
525	13579	HCD	673.85	1	3.49138	2	R	ALEEANTELEVK	I	sp|Q9QWL7|K1C17_MOUSE	150	150	6.00766e-15	1.13471e-07	0	0
526	18260	HCD	703.86	0	-2.51473	2	R	GNPTVEVDLYTAK	G	sp|P17182|ENOA_MOUSE	128	109	6.06844e-15	1.15002e-07	0	0
527	20549	HCD	610.312	0	2.00013	2	K	C+57.021AVVDVPFGGAK	A	sp|P26443|DHE3_MOUSE	116	106	6.29917e-15	1.18977e-07	0	0
528	22088	HCD	684.68	1	-5.76641	3	R	LHDNPALKEC+57.021IQGADTIR	C	sp|P97784|CRY1_MOUSE	98	71	6.34438e-15	1.21751e-07	0	0
529	18787	HCD	672.864	0	3.08413	2	R	TVIIEQSWGSPK	V	sp|P63038|CH60_MOUSE	161	159	6.4401e-15	1.21639e-07	0	0
530	21343	HCD	622.34	1	0.443379	2	K	NIEDVIAQGVGK	L	sp|P99027|RLA2_MOUSE	140	134	6.44464e-15	1.21725e-07	0	0
531	3668	HCD	442.207	0	1.58728	5	R	NSYSC+57.021SVVHEGLHNHHTTK	S	sp|P01865|GCAM_MOUSE	102	70	6.53689e-15	1.25699e-07	0	0
532	15225	HCD	600.32	1	-8.2048	3	K	APQVYTIPPPKEQMAK	D	sp|P01869|IGH1M_MOUSE	101	79	6.78383e-15	1.29609e-07	0	0
533	21583	HCD	965.47	1	8.06565	2	R	SLGYAYVNFQQPADAER	A	sp|P29341|PABP1_MOUSE	139	98	6.78903e-15	1.30006e-07	0	0
534	13970	HCD	458.58	0	-13.3094	3	R	KAWVANFERPR	M	sp|P97784|CRY1_MOUSE	120	110	6.79951e-15	1.27944e-07	0	0
535	12632	HCD	616.63	1	-5.90795	3	R	GNYDAAQRGPGGVWAAEK	I	sp|P05367|SAA2_MOUSE	130	85	7.14415e-15	1.37099e-07	0	0
536	13854	HCD	1089.99	1	-1.31555	2	K	LYGSGGPPPTGEEDTSEKDEL	-	sp|P20029|GRP78_MOUSE	148	95	7.20099e-15	1.38987e-07	0	0
537	38026	HCD	860.932	1	-12.0222	2	R	FLLQC+57.021LEDLDANLR	K	sp|P97784|CRY1_MOUSE	166	144	7.20798e-15	1.37003e-07	0	0
538	14387	HCD	818.72	0	-4.47295	3	K	ERPAPAVSSTC+57.021ATAEDSSVLYSR	V	sp|Q8CGC7|SYEP_MOUSE	140	88	7.4221e-15	1.43746e-07	0	0
539	10624	HCD	691.83	1	0.840247	2	R	ALEESNYELEGK	I	sp|P02535|K1C10_MOUSE	100	100	7.60824e-15	1.43702e-07	0	0
540	16447	HCD	581.762	0	-1.99337	2	R	TSTADYAMFR	V	sp|Q8VCM7|FIBG_MOUSE	123	123	7.65201e-15	1.43355e-07	0	0
541	8922	HCD	614.818	0	-0.0992736	2	R	VEIIANDQGNR	I	sp|P20029|GRP78_MOUSE	149	149	7.69718e-15	1.44836e-07	0	0
542	24353	HCD	640.842	1	-13.1042	2	K	TLAFASVDLTNK	T	sp|Q9CQR4|ACO13_MOUSE	129	119	7.70174e-15	1.45469e-07	0	0
543	11047	HCD	678.372	0	-1.79946	2	K	AQQIQALQSNVR	A	sp|E9PV24|FIBA_MOUSE	146	141	7.73459e-15	1.46089e-07	0	0
544	19549	HCD	628.865	0	2.13524	2	K	LATEAGVEVIVR	I	sp|P97784|CRY1_MOUSE	129	129	7.79824e-15	1.47291e-07	0	0
545	20979	HCD	628.863	0	-1.26173	2	K	LATEAGVEVIVR	I	sp|P97784|CRY1_MOUSE	126	119	7.79824e-15	1.47291e-07	0	0
546	25753	HCD	847.92	1	4.28674	2	K	YIYDPWNAPEGIQK	V	sp|P97784|CRY1_MOUSE	114	80	7.90065e-15	1.50169e-07	0	0
547	6717	HCD	447.878	0	0.613244	3	R	ASNGDAWVEAHGK	L	sp|P38647|GRP75_MOUSE	93	85	8.06091e-15	1.5276e-07	0	0
548	7973	HCD	412.893	0	3.91733	3	R	YLAEVATGEKR	A	sp|P61982|1433G_MOUSE	111	107	8.13483e-15	1.53071e-07	0	0
549	19868	HCD	657.36	1	-1.06698	2	K	NLAPLVEDVQSK	V	sp|P06728|APOA4_MOUSE	126	120	8.27441e-15	1.56285e-07	0	0
550	7710	HCD	417.532	0	1.46181	3	R	YNDLGEQHFK	G	sp|P07724|ALBU_MOUSE	89	89	8.6357e-15	1.61784e-07	0	0
551	24936	HCD	830.45	0	-1.46993	2	R	IINEPTAAAIAYGLDK	R	sp|P20029|GRP78_MOUSE	101	86	8.70415e-15	1.66298e-07	0	0
552	15834	HCD	696.34	1	-8.19973	2	K	QSLEASLAETEGR	Y	sp|P02535|K1C10_MOUSE	108	100	8.94193e-15	1.69456e-07	0	0
553	16653	HCD	415.888	0	0.366897	3	K	AWVANFERPR	M	sp|P97784|CRY1_MOUSE	111	109	8.96515e-15	1.67956e-07	0	0
554	12327	HCD	492.289	0	9.8567	3	R	NGPPVIHSGIKDLK	V	sp|P25688|URIC_MOUSE	83	72	9.25126e-15	1.7584e-07	0	0
555	9763	HCD	563.94	1	-12.8495	3	R	ASGNYATVISHNPETK	K	sp|P62918|RL8_MOUSE	109	84	9.31095e-15	1.77891e-07	0	0
556	11320	HCD	674.795	0	-1.17585	2	R	SEDTALYYC+57.021AR	L	sp|P01808|HVM38_MOUSE	159	154	9.48674e-15	1.78509e-07	0	0
557	10610	HCD	587.328	0	1.0392	2	K	VLVANNSDTLK	L	sp|Q8C4V4|FBXL3_MOUSE	132	132	9.63623e-15	1.81322e-07	0	0
558	11262	HCD	666.799	0	1.46456	2	R	AEDTAIYYC+57.021AR	D	sp|P01788|HVM19_MOUSE	112	106	9.64941e-15	1.8157e-07	0	0
559	20715	HCD	645.85	0	9.73397	2	K	VQQTVQDLFGR	A	sp|P38647|GRP75_MOUSE	128	126	1.02431e-14	1.92742e-07	0	0
560	20098	HCD	896.91	1	-3.3692	2	R	TYLGNALVC+57.021TC+57.021YGGSR	G	sp|P11276|FINC_MOUSE	111	77	1.11099e-14	2.1226e-07	0	0
561	11239	HCD	455.922	0	1.27179	3	K	VNNKDLPAPIER	T	sp|P01865|GCAM_MOUSE	97	91	1.11464e-14	2.1053e-07	0	0
562	22281	HCD	677.39	0	4.14477	2	K	LVILANNC+57.021PALR	K	sp|P62889|RL30_MOUSE	93	82	1.11775e-14	2.11117e-07	0	0
563	24772	HCD	661.34	0	3.8762	3	K	TVTNAVVTVPAYFNDSQR	Q	sp|P63017|HSP7C_MOUSE	96	70	1.1215e-14	2.15221e-07	0	0
564	9381	HCD	405.892	0	1.50373	3	K	GIPHLVTHDAR	T	sp|P62702|RS4X_MOUSE	139	138	1.12242e-14	2.11202e-07	0	0
565	13326	HCD	695.83	0	-7.45577	2	R	ADIVENQVMDTR	M	sp|P10649|GSTM1_MOUSE	137	125	1.14152e-14	2.15607e-07	0	0
566	10857	HCD	460.918	0	0.993158	3	R	VYKQSDLDTLAK	E	sp|P11725|OTC_MOUSE	98	94	1.14487e-14	2.16241e-07	0	0
567	13227	HCD	600.62	0	2.23565	3	R	TGDGKILYSQC+57.021GDVMR	A	sp|Q60605|MYL6_MOUSE	89	62	1.14792e-14	2.19316e-07	0	0
568	37935	HCD	966.095	0	7.0759	2	R	VTIAQGGVLPNIQAVLLPK	K	sp|Q8CGP7|H2A1K_MOUSE	133	94	1.15641e-14	2.22368e-07	0	0
569	9473	HCD	582.323	0	-2.51551	2	R	GPLSQAPTPAPK	F	sp|Q62523|ZYX_MOUSE	73	73	1.21529e-14	2.29541e-07	0	0
570	13856	HCD	678.361	1	-15.0801	2	R	ALGQNPTNAEVLK	V	sp|Q60605|MYL6_MOUSE	140	122	1.2558e-14	2.37984e-07	0	0
571	4284	HCD	552.751	1	-10.7974	4	R	NSYSC+57.021SVVHEGLHNHHTTK	S	sp|P01865|GCAM_MOUSE	163	81	1.27442e-14	2.45059e-07	0	0
572	19782	HCD	577.255	1	-9.16758	3	R	YIGGC+57.021C+57.021GFEPYHIR	A	sp|O35490|BHMT1_MOUSE	109	83	1.28188e-14	2.43649e-07	0	0
573	8340	HCD	733.84	1	-3.11965	2	K	SYC+57.021AEIAHNVSSK	N	sp|P62911|RL32_MOUSE	36	30	1.29832e-14	2.46041e-07	0	0
574	27304	HCD	889.995	0	1.16585	2	R	APQVYILPPPAEQLSR	K	sp|P01867|IGG2B_MOUSE	188	141	1.30581e-14	2.49482e-07	0	0
575	10424	HCD	400.72	1	-12.458	4	K	LTPEEEEILNKKR	S	sp|P62242|RS8_MOUSE	116	112	1.31424e-14	2.49059e-07	0	0
576	16610	HCD	638.36	1	-3.41085	3	K	TVGVEPAADGKGVVVVMKR	R	sp|P41105|RL28_MOUSE	93	73	1.34628e-14	2.58878e-07	0	0
577	10811	HCD	525.26	0	-12.7818	2	K	GFEEAVAAGAK	E	sp|P38060|HMGCL_MOUSE	95	91	1.40109e-14	2.63639e-07	0	0
578	6871	HCD	486.89	0	-3.63534	3	R	TNYNDRYDEIR	R	sp|P12970|RL7A_MOUSE	134	105	1.46339e-14	2.75362e-07	0	0
579	21674	HCD	725.409	0	2.52418	2	R	FVTVQTISGTGALR	V	sp|P05202|AATM_MOUSE	139	127	1.47472e-14	2.80301e-07	0	0
580	8936	HCD	592.75	0	-0.308908	2	R	SGQGAFGNMC+57.021R	G	sp|Q9D8E6|RL4_MOUSE	88	80	1.47609e-14	2.77751e-07	0	0
581	4590	HCD	638.776	0	-0.1911	2	K	SYSSGGEDGYVR	I	sp|Q9QZD9|EIF3I_MOUSE	137	131	1.48232e-14	2.79977e-07	0	0
582	7738	HCD	536.792	0	2.04667	2	R	TSNLASGVPAR	F	sp|P01680|KV4A1_MOUSE	130	130	1.51422e-14	2.84927e-07	0	0
583	14675	HCD	599.99	0	-0.813815	3	K	APQVYTIPPPKEQMAK	D	sp|P01869|IGH1M_MOUSE	117	86	1.54164e-14	2.94538e-07	0	0
584	18801	HCD	545.31	0	17.2371	2	R	LLADPTGAFGK	A	sp|P99029|PRDX5_MOUSE	100	100	1.55598e-14	2.92784e-07	0	0
585	18910	HCD	614.842	0	-0.694887	2	K	TSGPPVSELITK	A	sp|P43274|H14_MOUSE	90	83	1.63191e-14	3.08231e-07	0	0
586	22183	HCD	684.35	0	0.713497	3	R	LHDNPALKEC+57.021IQGADTIR	C	sp|P97784|CRY1_MOUSE	93	64	1.67673e-14	3.21771e-07	0	0
587	11260	HCD	595.62	0	-6.04589	3	R	YDYQRQPDSGISSIR	S	sp|Q91YQ5|RPN1_MOUSE	112	75	1.67764e-14	3.19731e-07	0	0
588	16461	HCD	633.322	0	-1.25285	2	R	TNAENEFVTIK	K	sp|P04104|K2C1_MOUSE	89	85	1.75297e-14	3.29851e-07	0	0
589	16287	HCD	633.82	1	-6.2144	2	R	TNAENEFVTIK	K	sp|P04104|K2C1_MOUSE	124	121	1.75297e-14	3.29851e-07	0	0
590	21547	HCD	688.002	0	1.68556	3	R	FSGVPDRFSGSGSGTDFTLK	I	sp|P01631|KV2A7_MOUSE	135	101	1.76842e-14	3.40703e-07	0	0
591	10755	HCD	709.85	0	-1.5477	2	R	C+57.021TGGEVGATSALAPK	I	sp|P35979|RL12_MOUSE	132	100	1.82086e-14	3.47027e-07	0	0
592	20614	HCD	575.3	0	5.30467	3	K	HGGTIPVVPTAEFQDR	I	sp|P26443|DHE3_MOUSE	119	88	1.83501e-14	3.50588e-07	0	0
593	15595	HCD	622.34	1	-8.5866	2	K	AGNLGGGVVTIER	S	sp|P67984|RL22_MOUSE	134	125	1.92831e-14	3.6543e-07	0	0
594	4071	HCD	552.752	1	-9.80322	4	R	NSYSC+57.021SVVHEGLHNHHTTK	S	sp|P01865|GCAM_MOUSE	175	90	1.92968e-14	3.71061e-07	0	0
595	8478	HCD	724.831	0	0.505237	2	K	ANDYTTEYSASVK	G	sp|P01788|HVM19_MOUSE	103	91	1.96538e-14	3.72454e-07	0	0
596	18752	HCD	685.34	0	4.18575	3	R	NALVSHLDGTTPVC+57.021EDIGR	S	sp|Q9CZ13|QCR1_MOUSE	105	81	1.9732e-14	3.79428e-07	0	0
597	11954	HCD	427.488	0	-0.571105	4	R	DLDRIAGQVAAANKKH	-	sp|Q9CZX8|RS19_MOUSE	97	73	2.03991e-14	3.89736e-07	0	0
598	16289	HCD	581.31	0	-4.5148	2	K	EITALAPSTMK	I	sp|P60710|ACTB_MOUSE	110	109	2.07366e-14	3.90194e-07	0	0
599	11148	HCD	674.796	0	0.994948	2	R	SEDTALYYC+57.021AR	L	sp|P01808|HVM38_MOUSE	153	148	2.10284e-14	3.95685e-07	0	0
600	24881	HCD	699.4	0	2.96712	2	K	ELEEIVQPIISK	L	sp|P20029|GRP78_MOUSE	86	85	2.10512e-14	3.97611e-07	0	0
601	7944	HCD	529.287	0	0.230632	3	K	VLKSHGQDYLVGNR	L	sp|P13745|GSTA1_MOUSE	108	85	2.11521e-14	4.02041e-07	0	0
602	5500	HCD	676.81	0	1.17235	2	R	TMQNTSDLDTAR	C	sp|Q02257|PLAK_MOUSE	81	76	2.19298e-14	4.14205e-07	0	0
603	35804	HCD	454.27	1	-5.46637	3	R	GLFIIDDKGILR	Q	sp|P35700|PRDX1_MOUSE	133	133	2.23355e-14	4.21868e-07	0	0
604	15088	HCD	672.368	0	0.907765	2	K	TAAAVAAQSGILDR	T	sp|Q9R112|SQRD_MOUSE	147	128	2.33456e-14	4.43732e-07	0	0
605	14835	HCD	685.71	1	-2.64089	3	K	GNPTKVVAVDC+57.021GIKNNVIR	L	sp|Q8C196|CPSM_MOUSE	149	95	2.33779e-14	4.49536e-07	0	0
606	28035	HCD	842.95	0	-7.31301	2	R	AAVEEGIVLGGGC+57.021ALLR	C	sp|P63038|CH60_MOUSE	147	118	2.3509e-14	4.50182e-07	0	0
607	13025	HCD	510.58	1	-18.4396	3	R	HVLQQFADNDVSR	F	sp|P51660|DHB4_MOUSE	136	103	2.36268e-14	4.47745e-07	0	0
608	24703	HCD	600.34	0	-1.22001	2	K	DAGTIAGLNVLR	I	sp|P63017|HSP7C_MOUSE	121	119	2.41257e-14	4.55681e-07	0	0
609	4702	HCD	404.446	0	0.150911	4	R	TNYNDRYDEIRR	H	sp|P12970|RL7A_MOUSE	154	124	2.46041e-14	4.64715e-07	0	0
610	18455	HCD	665.855	0	1.74163	2	K	FLIPNASQPESK	V	sp|P63101|1433Z_MOUSE	70	69	2.48248e-14	4.68885e-07	0	0
611	13608	HCD	578.91	0	-7.48556	3	K	C+57.021C+57.021LTYC+57.021FNKPEDK	-	sp|P62983|RS27A_MOUSE	119	84	2.49077e-14	4.7202e-07	0	0
612	15336	HCD	666.34	0	2.93113	2	R	ELAEAQDDSILK	-	sp|Q06185|ATP5I_MOUSE	100	93	2.50638e-14	4.73398e-07	0	0
613	15117	HCD	570.77	1	-19.3165	2	R	GC+57.021TATLGNFAK	A	sp|P25444|RS2_MOUSE	98	91	2.51091e-14	4.72471e-07	0	0
614	18118	HCD	788.4	0	4.25792	2	R	ILGADTSVDLEETGR	V	sp|Q03265|ATPA_MOUSE	131	105	2.53001e-14	4.82179e-07	0	0
615	20422	HCD	644.353	0	3.31532	2	K	HALIIYDDLSK	Q	sp|Q03265|ATPA_MOUSE	130	130	2.55257e-14	4.8031e-07	0	0
616	12342	HCD	448.25	1	-4.19475	5	K	GRPKAPQVYTIPPPKEQMAK	D	sp|P01869|IGH1M_MOUSE	106	63	2.60269e-14	5.01433e-07	0	0
617	20608	HCD	575.63	1	-2.40356	3	K	HGGTIPVVPTAEFQDR	I	sp|P26443|DHE3_MOUSE	116	87	2.64056e-14	5.04493e-07	0	0
618	13235	HCD	465.577	1	-12.6144	3	R	TNAENEFVTIKK	D	sp|P04104|K2C1_MOUSE	150	127	2.64991e-14	5.00509e-07	0	0
619	9138	HCD	551.59	0	-6.52849	3	K	IFRDGEEAGAYDGPR	T	sp|P27773|PDIA3_MOUSE	110	87	2.66511e-14	5.07926e-07	0	0
620	8715	HCD	598.297	0	1.93829	2	R	GLETTATYDPK	T	sp|Q9R0H0|ACOX1_MOUSE	81	80	2.67219e-14	5.02819e-07	0	0
621	15820	HCD	513.309	0	0.356716	2	K	IGGIGTVPVGR	V	sp|P10126|EF1A1_MOUSE	96	96	2.80497e-14	5.27804e-07	0	0
622	16003	HCD	513.309	0	0.713432	2	K	IGGIGTVPVGR	V	sp|P10126|EF1A1_MOUSE	157	157	2.80497e-14	5.27804e-07	0	0
623	13166	HCD	589.945	0	0.931133	3	R	VVHSYEELEENYTR	A	sp|Q05920|PYC_MOUSE	90	82	2.88121e-14	5.47635e-07	0	0
624	21892	HCD	942.95	1	-8.57982	2	R	NALPTPSDDPTALMTDPK	Y	sp|P11352|GPX1_MOUSE	94	69	2.91529e-14	5.59456e-07	0	0
625	31681	HCD	952.98	0	-19.5338	2	R	MNANSLLASPTGLSPYLR	F	sp|P97784|CRY1_MOUSE	121	92	2.94065e-14	5.64322e-07	0	0
626	8643	HCD	596.305	0	1.53534	2	R	LAPEYEAAATR	L	sp|P27773|PDIA3_MOUSE	99	99	3.00797e-14	5.66001e-07	0	0
627	14525	HCD	677.37	0	6.93822	2	R	GQNQPVLNITNR	Q	sp|Q8C196|CPSM_MOUSE	102	94	3.10861e-14	5.87146e-07	0	0
628	15968	HCD	548.62	0	4.00509	3	K	TYIIGELHPDDRSK	I	sp|P56395|CYB5_MOUSE	81	69	3.15157e-14	5.99022e-07	0	0
629	14744	HCD	708.38	0	2.67102	2	R	ITSLEVENQNLR	G	sp|P57776|EF1D_MOUSE	121	106	3.15657e-14	5.96206e-07	0	0
630	12353	HCD	722.86	0	4.13736	2	R	SLYSSSPGGAYVTR	S	sp|P20152|VIME_MOUSE	91	79	3.17917e-14	6.04269e-07	0	0
631	9816	HCD	575.96	1	-5.37108	3	R	QAVTNPNNTFYATKR	L	sp|P38647|GRP75_MOUSE	111	76	3.21147e-14	6.12053e-07	0	0
632	15202	HCD	584.29	0	1.0446	2	R	FGEVVDC+57.021TIK	T	sp|Q9Z130|HNRDL_MOUSE	124	124	3.21247e-14	6.01835e-07	0	0
633	15202	HCD	584.29	0	1.0446	2	K	FGEVVDC+57.021TLK	L	sp|Q60668|HNRPD_MOUSE	124	124	3.21247e-14	6.01835e-07	0	0
634	14656	HCD	626.83	0	-6.23171	2	K	MKEIAEAYLGK	T	sp|P63017|HSP7C_MOUSE	95	91	3.23175e-14	6.0811e-07	0	0
635	12051	HCD	697.87	1	-2.05526	2	R	TNAENEFVTIKK	D	sp|P04104|K2C1_MOUSE	111	93	3.25792e-14	6.15347e-07	0	0
636	25036	HCD	841.93	1	3.66441	2	R	LSQTFPNADFAEITK	L	sp|P07724|ALBU_MOUSE	116	86	3.30001e-14	6.28927e-07	0	0
637	17391	HCD	741.91	1	1.5244	2	K	SQIHDIVLVGGSTR	I	sp|P63017|HSP7C_MOUSE	100	89	3.37026e-14	6.4059e-07	0	0
638	33043	HCD	951.48	1	0.150468	3	K	TTAPSVYPLAPVC+57.021GDTTGSSVTLGC+57.021LVK	G	sp|P01865|GCAM_MOUSE	201	76	3.3715e-14	6.58002e-07	0	0
639	7999	HCD	603.295	0	-1.0117	2	R	VGSVLQEGC+57.021EK	I	sp|Q8K2B3|SDHA_MOUSE	127	125	3.40261e-14	6.40259e-07	0	0
640	9438	HCD	704.817	0	-1.12576	2	R	ADFAQAC+57.021QDAGVR	F	sp|Q05920|PYC_MOUSE	134	117	3.42273e-14	6.48633e-07	0	0
641	10483	HCD	510.583	0	0.717241	3	K	IGGHGAEYGAEALER	M	sp|P01942|HBA_MOUSE	146	123	3.45593e-14	6.58643e-07	0	0
642	4308	HCD	442.403	1	-9.01202	5	R	NSYSC+57.021SVVHEGLHNHHTTK	S	sp|P01865|GCAM_MOUSE	134	64	3.50767e-14	6.74494e-07	0	0
643	29748	HCD	637.868	0	2.77491	2	R	LLVVYPWTQR	F	sp|P02104|HBE_MOUSE	127	127	3.5413e-14	6.63438e-07	0	0
644	21595	HCD	774.43	1	1.14489	2	K	VLEQLTGQTPVFSK	A	sp|Q9CXW4|RL11_MOUSE	110	94	3.60196e-14	6.8463e-07	0	0
645	22059	HCD	682.84	1	-3.35282	2	K	IAEEFEVELER	G	sp|Q05920|PYC_MOUSE	136	136	3.72065e-14	7.00103e-07	0	0
646	17395	HCD	724.4	1	6.62019	2	K	DTVTTGLTGAVNVAK	G	sp|O88492|PLIN4_MOUSE	97	77	3.7597e-14	7.16538e-07	0	0
647	22949	HCD	599.64	1	-7.7049	3	R	VVSALPIQHQDWMSGK	E	sp|P01865|GCAM_MOUSE	123	72	3.8027e-14	7.26527e-07	0	0
648	22563	HCD	557.607	1	-1.71463	3	K	LSIEYDSEPFGKER	D	sp|P97784|CRY1_MOUSE	104	77	3.87556e-14	7.36633e-07	0	0
649	15182	HCD	601.313	0	1.72556	2	R	QSVEADINGLR	R	sp|P02535|K1C10_MOUSE	133	133	4.00026e-14	7.52716e-07	0	0
650	16669	HCD	746.37	1	1.67895	2	K	GILAADESVGTMGNR	L	sp|Q91Y97|ALDOB_MOUSE	95	81	4.1895e-14	7.9845e-07	0	0
651	19963	HCD	450.92	0	-12.7234	3	R	LIDLHSPSEIVK	Q	sp|P60867|RS20_MOUSE	83	79	4.29097e-14	8.10468e-07	0	0
652	17453	HCD	659.8	1	0.0478833	2	K	LSC+57.021AASGFDFSR	Y	sp|P01808|HVM38_MOUSE	99	93	4.35386e-14	8.22347e-07	0	0
653	20390	HCD	568.803	0	0.536523	2	K	GYFPEPVTVK	W	sp|P03987|IGHG3_MOUSE	90	88	4.36882e-14	8.18468e-07	0	0
654	21800	HCD	613.348	0	-0.796091	2	R	QITINDLPVGR	S	sp|P35700|PRDX1_MOUSE	139	139	4.51955e-14	8.50429e-07	0	0
655	21800	HCD	613.348	0	-0.796091	2	R	QITLNDLPVGR	S	sp|O08807|PRDX4_MOUSE	139	139	4.51955e-14	8.50429e-07	0	0
656	12475	HCD	932.92	0	-2.94406	2	K	LNSVTTEDTATYYC+57.021AR	-	sp|P18531|HVM60_MOUSE	70	48	4.60577e-14	8.79958e-07	0	0
657	35402	HCD	651.86	0	-1.87264	2	R	SLDLDSIIAEVK	A	sp|P50446|K2C6A_MOUSE	93	91	4.75036e-14	8.97237e-07	0	0
658	36572	HCD	651.86	0	-1.87264	2	R	SLDLDSIIAEVK	A	sp|P50446|K2C6A_MOUSE	131	129	4.75036e-14	8.97237e-07	0	0
659	37074	HCD	651.861	0	0.0936321	2	R	SLDLDSIIAEVK	A	sp|P50446|K2C6A_MOUSE	152	150	4.75036e-14	8.97237e-07	0	0
660	36831	HCD	651.862	0	1.02995	2	R	SLDLDSIIAEVK	A	sp|P50446|K2C6A_MOUSE	153	151	4.75036e-14	8.97237e-07	0	0
661	20536	HCD	715.02	1	-8.68142	3	R	IADQC+57.021PSSLAIQENANALAR	Y	sp|Q91Y97|ALDOB_MOUSE	148	100	4.7504e-14	9.15209e-07	0	0
662	32627	HCD	732.37	1	-2.05568	3	R	GFPAKYIYDPWNAPEGIQK	V	sp|P97784|CRY1_MOUSE	90	57	4.76162e-14	9.15617e-07	0	0
663	5338	HCD	491.255	0	-1.61516	3	K	YYKVDENGKISR	L	sp|P62983|RS27A_MOUSE	69	62	4.76693e-14	9.00366e-07	0	0
664	20257	HCD	618.314	0	-2.96136	2	R	MVNHFIAEFK	R	sp|P63017|HSP7C_MOUSE	92	90	4.78742e-14	8.9689e-07	0	0
665	10576	HCD	620.59	0	-4.22904	4	K	GRPKAPQVYTIPPPKEQMAKDK	V	sp|P01869|IGH1M_MOUSE	107	61	4.84428e-14	9.36631e-07	0	0
666	9337	HCD	440.514	0	0.207832	4	R	VKKLEAAATALATKSEK	V	sp|Q9D8E6|RL4_MOUSE	98	78	5.05321e-14	9.67656e-07	0	0
667	20633	HCD	652.68	0	5.5174	3	R	APQVYVLPPPEEEMTKK	Q	sp|P01865|GCAM_MOUSE	129	86	5.07154e-14	9.71167e-07	0	0
668	5427	HCD	559.765	0	-2.28977	2	K	VNEAAC+57.021DIAR	Q	sp|O35490|BHMT1_MOUSE	150	150	5.08517e-14	9.52672e-07	0	0
669	14303	HCD	732.69	1	-7.47189	3	K	SLAGSSGPGASSGPGGDHSELIVR	I	sp|P57776|EF1D_MOUSE	171	88	5.1445e-14	9.97971e-07	0	0
670	21709	HCD	621.843	0	-0.294456	2	K	DAGQISGLNVLR	V	sp|P38647|GRP75_MOUSE	111	110	5.16069e-14	9.74739e-07	0	0
671	10838	HCD	566.768	0	0.86152	2	R	GYSFTTTAER	E	sp|P60710|ACTB_MOUSE	136	130	5.1746e-14	9.69427e-07	0	0
672	7388	HCD	716.806	1	-16.2305	2	K	YMC+57.021ENQATISSK	L	sp|P07724|ALBU_MOUSE	53	47	5.25081e-14	9.9176e-07	0	0
673	8144	HCD	667.819	0	-1.7365	2	K	IYIDSNNNPER	F	sp|Q68FD5|CLH1_MOUSE	128	118	5.40345e-14	1.01675e-06	0	0
674	6290	HCD	610.958	0	0.299703	3	R	QLEEAEEEAQRANASR	R	sp|Q8VDD5|MYH9_MOUSE	142	112	5.48363e-14	1.04768e-06	0	0
675	2098	HCD	510.246	1	-12.6465	3	K	RPSQEEDAQSVGPK	V	sp|P97784|CRY1_MOUSE	135	118	5.67867e-14	1.07935e-06	0	0
676	16874	HCD	734.89	1	-17.7423	2	R	AQTPQVYTIPPPR	E	sp|P03987|IGHG3_MOUSE	77	68	5.74058e-14	1.08788e-06	0	0
677	15251	HCD	506.26	1	8.54683	3	K	IWHHTFYNELR	V	sp|P60710|ACTB_MOUSE	102	82	5.93373e-14	1.11653e-06	0	0
678	14785	HCD	738.89	0	2.31291	2	R	FLEQQNQVLETK	W	sp|Q6IME9|K2C72_MOUSE	144	127	5.954e-14	1.12458e-06	0	0
679	19357	HCD	644.84	0	3.88073	2	R	GLC+57.021AIAQAESLR	Y	sp|P62908|RS3_MOUSE	116	104	5.97726e-14	1.12897e-06	0	0
680	38244	HCD	699.87	0	-6.36624	2	K	TTPDVIFVFGFR	T	sp|P62849|RS24_MOUSE	101	85	6.00273e-14	1.13378e-06	0	0
681	18282	HCD	552.292	1	-9.91392	3	K	C+57.021KVNNKDLPAPIER	T	sp|P01865|GCAM_MOUSE	114	89	6.21828e-14	1.18192e-06	0	0
682	16349	HCD	515.97	0	6.03293	3	K	AAVAVPNRPPDAVLR	D	sp|P51660|DHB4_MOUSE	115	87	6.29356e-14	1.19945e-06	0	0
683	30745	HCD	639.358	0	-0.286389	2	K	LALDIEIATYR	K	sp|P03995|GFAP_MOUSE	154	154	6.38701e-14	1.20182e-06	0	0
684	7807	HCD	605.794	0	1.10828	2	R	DLSSSDLSTASK	I	sp|Q61838|PZP_MOUSE	91	88	6.45189e-14	1.21862e-06	0	0
685	24244	HCD	400.24	0	-0.0762482	3	R	AVFPSIVGRPR	H	sp|P60710|ACTB_MOUSE	138	138	6.47042e-14	1.21752e-06	0	0
686	24428	HCD	400.24	0	-0.0762482	3	R	AVFPSIVGRPR	H	sp|P60710|ACTB_MOUSE	122	122	6.47042e-14	1.21752e-06	0	0
687	13797	HCD	458.585	0	-1.39749	3	R	KAWVANFERPR	M	sp|P97784|CRY1_MOUSE	135	111	6.49509e-14	1.22216e-06	0	0
688	10222	HCD	707.34	1	-2.28677	2	R	YLESC+57.021NIPSTTK	R	sp|O35973|PER1_MOUSE	87	79	6.53696e-14	1.23468e-06	0	0
689	13141	HCD	730.832	0	1.50327	2	R	IYTSIGEDYDER	V	sp|P67778|PHB_MOUSE	101	88	6.72108e-14	1.26946e-06	0	0
690	25197	HCD	992	1	-4.27724	2	K	TVTNAVVTVPAYFNDSQR	Q	sp|P63017|HSP7C_MOUSE	161	114	6.7796e-14	1.30103e-06	0	0
691	12937	HCD	411.21	0	7.1246	3	R	SLGTADVHFER	R	sp|Q9JJW6|ALRF2_MOUSE	103	96	6.92147e-14	1.30239e-06	0	0
692	23999	HCD	400.57	1	-11.1559	3	R	AVFPSIVGRPR	H	sp|P60710|ACTB_MOUSE	125	122	7.02378e-14	1.32164e-06	0	0
693	38185	HCD	669.93	1	-4.60275	2	K	AIIIFVPVPQLK	S	sp|P62082|RS7_MOUSE	114	111	7.53402e-14	1.42301e-06	0	0
694	11116	HCD	614.333	0	0.596112	2	K	VLEDNSVPQVK	D	sp|Q9D051|ODPB_MOUSE	76	74	7.89943e-14	1.48641e-06	0	0
695	5755	HCD	595.765	0	-2.25386	2	K	LSNNYYC+57.021TR	D	sp|Q9Z1P6|NDUA7_MOUSE	109	109	7.96807e-14	1.48489e-06	0	0
696	6327	HCD	412.888	0	1.69999	3	R	VITEEEKNFK	A	sp|P47963|RL13_MOUSE	126	126	8.00164e-14	1.49905e-06	0	0
697	37542	HCD	1282	1	0.302152	3	K	KGSITSVQAIYVPADDLTDPAPATTFAHLDATTVLSR	A	sp|P56480|ATPB_MOUSE	120	24	8.03076e-14	1.58615e-06	0	0
698	9644	HCD	717.367	0	2.21214	2	K	ASLENSLEETKGR	Y	sp|Q9Z2K1|K1C16_MOUSE	101	87	8.04484e-14	1.52456e-06	0	0
699	16547	HCD	457.605	0	1.06704	3	K	KLDQVEKELLR	V	sp|Q9DB20|ATPO_MOUSE	152	152	8.27961e-14	1.55795e-06	0	0
700	10934	HCD	557.622	1	-12.4476	3	K	C+57.021KVNNKDLPSPIER	T	sp|P01867|IGG2B_MOUSE	101	86	8.34144e-14	1.58547e-06	0	0
701	18047	HCD	582.63	0	9.21879	3	R	LLLEYTDSSYEEKR	Y	sp|P19639|GSTM4_MOUSE	91	69	8.34305e-14	1.58577e-06	0	0
702	8344	HCD	562.59	1	-8.97248	3	K	HTGPNSPDTANDGFVR	L	sp|O35737|HNRH1_MOUSE	77	55	8.39648e-14	1.60419e-06	0	0
703	14985	HCD	495.23	0	0.739477	3	K	GGDVSVC+57.021EWYRR	V	sp|P56391|CX6B1_MOUSE	133	103	8.43647e-14	1.59346e-06	0	0
704	14799	HCD	418.225	0	-0.510785	3	K	MKEIAEAYLGK	T	sp|P63017|HSP7C_MOUSE	96	94	8.4807e-14	1.59579e-06	0	0
705	13149	HCD	1026.02	0	-0.594873	2	R	LHDNPALKEC+57.021IQGADTIR	C	sp|P97784|CRY1_MOUSE	81	51	8.56597e-14	1.64384e-06	0	0
706	10578	HCD	420.92	0	-5.36513	3	K	SLVSKGTLVQTK	G	sp|P43277|H13_MOUSE	121	109	8.67097e-14	1.63775e-06	0	0
707	5995	HCD	464.926	0	0.131279	3	R	HEGLKNYYLKK	T	sp|P01867|IGG2B_MOUSE	67	62	8.76894e-14	1.65002e-06	0	0
708	10339	HCD	554.28	0	-13.7643	2	K	ALAAAGYDVEK	N	sp|P43277|H13_MOUSE	60	55	8.77326e-14	1.65084e-06	0	0
709	11322	HCD	583.29	0	-10.3592	2	K	YEELQVTAGR	H	sp|P50446|K2C6A_MOUSE	111	111	8.82817e-14	1.6539e-06	0	0
710	19809	HCD	400.239	0	-1.37247	3	R	AVFPSIVGRPR	H	sp|P60710|ACTB_MOUSE	110	100	8.8466e-14	1.66464e-06	0	0
711	21563	HCD	653.005	1	-9.69333	3	R	APQVYVLPPPEEEMTKK	Q	sp|P01865|GCAM_MOUSE	117	81	8.85472e-14	1.69562e-06	0	0
712	14735	HCD	438.23	1	9.73527	3	K	FLSHWDHITR	V	sp|Q8BH95|ECHM_MOUSE	74	72	8.919e-14	1.67092e-06	0	0
713	4122	HCD	547.268	0	0.557636	2	R	IADGYEQAAR	I	sp|P80316|TCPE_MOUSE	114	114	8.9358e-14	1.67406e-06	0	0
714	12599	HCD	675.29	1	-10.7167	2	R	SEDTALYYC+57.021AR	L	sp|P01808|HVM38_MOUSE	113	100	8.97257e-14	1.68834e-06	0	0
715	5505	HCD	736.668	1	-8.42619	3	R	NSYSC+57.021SVVHEGLHNHHTTK	S	sp|P01865|GCAM_MOUSE	137	75	8.99239e-14	1.72916e-06	0	0
716	10636	HCD	566.768	0	1.0769	2	R	GYSFTTTAER	E	sp|P60710|ACTB_MOUSE	108	102	9.00537e-14	1.6871e-06	0	0
717	20989	HCD	598.819	0	0.611555	2	R	LVQAFQFTDK	H	sp|P35700|PRDX1_MOUSE	90	89	9.14911e-14	1.71402e-06	0	0
718	18379	HCD	864.882	0	-3.03452	2	R	YIGGC+57.021C+57.021GFEPYHIR	A	sp|O35490|BHMT1_MOUSE	70	46	9.24855e-14	1.75788e-06	0	0
719	37596	HCD	1376.21	1	3.661	2	R	FQTLVSKMEPLEMPADTITSDVIGK	C	sp|P97784|CRY1_MOUSE	105	59	9.31417e-14	1.80969e-06	0	0
720	11746	HCD	580.619	0	1.89218	3	K	TSTSPIVKSFNRNEC+57.021	-	sp|P01837|IGKC_MOUSE	131	83	9.40107e-14	1.79169e-06	0	0
721	9569	HCD	504.27	0	-8.65405	3	R	TANLGAGAAQPLRDR	A	sp|P08226|APOE_MOUSE	136	106	9.40264e-14	1.79199e-06	0	0
722	39633	HCD	519.98	1	8.96719	3	R	GVMLAVDAVIAELKK	Q	sp|P63038|CH60_MOUSE	99	74	9.40806e-14	1.79302e-06	0	0
723	7191	HCD	646.835	0	2.17028	2	K	ALQTTYGTNAPR	M	sp|Q8CG76|ARK72_MOUSE	90	87	9.58256e-14	1.80993e-06	0	0
724	2482	HCD	497.47	1	-11.3842	4	R	HSSYSC+57.021QVTHEGHTVEK	S	sp|P01843|LAC1_MOUSE	74	50	9.5831e-14	1.8351e-06	0	0
725	11967	HCD	727.82	0	-0.0838602	2	K	NANC+57.021SIEESFQR	F	sp|P38060|HMGCL_MOUSE	69	60	9.61286e-14	1.81565e-06	0	0
726	9823	HCD	544.941	1	-8.25462	3	K	ISGQKVNEAAC+57.021DIAR	Q	sp|O35490|BHMT1_MOUSE	134	95	9.65035e-14	1.8392e-06	0	0
727	11123	HCD	552.29	1	-12.8995	3	K	C+57.021KVNNKDLPAPIER	T	sp|P01865|GCAM_MOUSE	134	100	9.66788e-14	1.83758e-06	0	0
728	19177	HCD	809.435	1	-10.1468	2	K	LLIYAASNQGSGVPAR	F	sp|P01654|KV3A1_MOUSE	200	133	9.74228e-14	1.86132e-06	0	0
729	17311	HCD	435.239	0	-0.981635	3	K	SLEKVC+57.021ADLIR	G	sp|P60867|RS20_MOUSE	124	121	9.7431e-14	1.83333e-06	0	0
730	14840	HCD	596.297	0	2.96836	2	K	VAQLC+57.021DFNPK	S	sp|Q6IRU5|CLCB_MOUSE	95	95	1.01066e-13	1.89341e-06	0	0
731	26234	HCD	847.41	0	-5.54594	2	K	YIYDPWNAPEGIQK	V	sp|P97784|CRY1_MOUSE	117	72	1.02034e-13	1.93937e-06	0	0
732	20701	HCD	593.846	0	4.52232	2	R	IALTDNSLIAR	S	sp|P14148|RL7_MOUSE	145	145	1.0274e-13	1.93324e-06	0	0
733	15888	HCD	540.27	1	-1.20448	3	K	ITLVTYEC+57.021DKGYR	L	sp|P08607|C4BPA_MOUSE	69	53	1.03328e-13	1.95815e-06	0	0
734	15183	HCD	530.302	0	2.07172	2	R	AAYQVAALPR	G	sp|P52760|UK114_MOUSE	70	70	1.0422e-13	1.95248e-06	0	0
735	21033	HCD	660.31	1	5.85822	3	R	EAAQMDMVNDGVEDLRGK	Y	sp|P19157|GSTP1_MOUSE	77	47	1.07013e-13	2.05361e-06	0	0
736	16458	HCD	596.278	0	-1.94484	3	K	NKDQGTYEDYVEGLR	V	sp|Q60605|MYL6_MOUSE	152	103	1.07185e-13	2.04277e-06	0	0
737	37463	HCD	986.84	1	-7.8361	3	R	KRNEDEDSPNKLYTLVTYVPVTTFK	N	sp|P62900|RL31_MOUSE	192	86	1.07632e-13	2.09122e-06	0	0
738	15369	HCD	634.659	0	-0.38468	3	-	EVKLEESGGGLVQPGGSMK	L	sp|P01797|HVM28_MOUSE	110	76	1.07731e-13	2.07158e-06	0	0
739	10262	HCD	616.31	0	-6.93228	2	K	NNTQVLINC+57.021R	N	sp|P62317|SMD2_MOUSE	115	115	1.1139e-13	2.08682e-06	0	0
740	23101	HCD	557.61	1	3.10445	3	K	LSIEYDSEPFGKER	D	sp|P97784|CRY1_MOUSE	83	64	1.11474e-13	2.1188e-06	0	0
741	30382	HCD	812.95	0	1.35142	2	R	TGAIVDVPVGEELLGR	V	sp|Q03265|ATPA_MOUSE	134	107	1.12228e-13	2.14417e-06	0	0
742	19618	HCD	598.3	1	2.50321	2	R	YYTYLVMNK	G	sp|P01027|CO3_MOUSE	49	49	1.13923e-13	2.12301e-06	0	0
743	16907	HCD	578.34	0	-10.1313	2	R	VVLVTGAGGGLGR	A	sp|P51660|DHB4_MOUSE	100	89	1.15992e-13	2.19813e-06	0	0
744	35209	HCD	820.93	1	-18.8573	2	K	SLNDKFASFIDKVR	F	sp|P04104|K2C1_MOUSE	84	56	1.16861e-13	2.22119e-06	0	0
745	9954	HCD	827.44	0	-0.958929	2	K	C+57.021KVNNKDLPAPIER	T	sp|P01865|GCAM_MOUSE	99	71	1.17146e-13	2.22661e-06	0	0
746	19900	HCD	619.01	1	-11.3111	3	-	EVQLVESGGGLVKPGGSLK	L	sp|P18528|HVM57_MOUSE	135	98	1.17809e-13	2.26537e-06	0	0
747	24994	HCD	700.36	0	0	3	K	TQDPAKAPNSPDVLEIEFK	K	sp|P16460|ASSY_MOUSE	79	43	1.17974e-13	2.26853e-06	0	0
748	9261	HCD	575.628	0	-0.848257	3	R	QAVTNPNNTFYATKR	L	sp|P38647|GRP75_MOUSE	72	49	1.18477e-13	2.25797e-06	0	0
749	15838	HCD	554.3	0	-10.6808	2	R	TIAQDYGVLK	A	sp|P35700|PRDX1_MOUSE	86	86	1.20797e-13	2.26305e-06	0	0
750	14702	HCD	846.94	0	-4.46804	2	K	AVANYDSVEAGEKLVK	T	sp|P51660|DHB4_MOUSE	88	66	1.21893e-13	2.32884e-06	0	0
751	22285	HCD	618.309	0	1.57941	2	K	TFEVC+57.021DLPVR	A	sp|O55029|COPB2_MOUSE	53	52	1.24165e-13	2.32615e-06	0	0
752	19075	HCD	504.79	0	0.785928	2	R	VTGGIFSVTK	G	sp|Q9DAM7|TM263_MOUSE	78	78	1.24779e-13	2.33766e-06	0	0
753	11303	HCD	827.934	1	-10.5838	2	K	C+57.021KVNNKDLPAPIER	T	sp|P01865|GCAM_MOUSE	154	112	1.30222e-13	2.47514e-06	0	0
754	16176	HCD	535.628	0	3.64643	3	K	TKPYIQVDIGGGQTK	T	sp|P20029|GRP78_MOUSE	104	81	1.38889e-13	2.647e-06	0	0
755	11489	HCD	674.796	0	0.904498	2	R	SEDTALYYC+57.021AR	L	sp|P01808|HVM38_MOUSE	142	124	1.40017e-13	2.63466e-06	0	0
756	10935	HCD	511.27	0	4.59613	4	K	EFVC+57.021TVTHRDLPSPQKK	F	sp|P01872|IGHM_MOUSE	113	68	1.44186e-13	2.76107e-06	0	0
757	9803	HCD	525.279	0	2.44012	3	R	ALLAGKDSETGENIR	Q	sp|P38647|GRP75_MOUSE	98	80	1.46309e-13	2.78841e-06	0	0
758	9745	HCD	557.797	0	1.86017	2	R	ASNLESGIPAR	F	sp|P01660|KV3A8_MOUSE	122	121	1.49464e-13	2.81242e-06	0	0
759	15585	HCD	621.85	0	10.1096	2	K	AGNLGGGVVTIER	S	sp|P67984|RL22_MOUSE	126	117	1.57733e-13	2.98916e-06	0	0
760	23325	HCD	757.4	0	4.67396	2	R	GVVDSEDIPLNLSR	E	sp|Q9CQN1|TRAP1_MOUSE	81	66	1.6247e-13	3.08808e-06	0	0
761	23325	HCD	757.4	0	4.67396	2	R	GVVDSEDLPLNISR	E	sp|P11499|HS90B_MOUSE	81	66	1.6247e-13	3.08808e-06	0	0
762	5973	HCD	433.21	1	-7.65287	5	R	HNSYTC+57.021EATHKTSTSPIVK	S	sp|P01837|IGKC_MOUSE	58	36	1.65464e-13	3.18174e-06	0	0
763	33801	HCD	900.46	0	9.15068	2	K	AYLPVNESFGFTADLR	S	sp|P58252|EF2_MOUSE	82	53	1.67667e-13	3.20336e-06	0	0
764	25009	HCD	992	1	-4.27724	2	K	TVTNAVVTVPAYFNDSQR	Q	sp|P63017|HSP7C_MOUSE	202	126	1.68485e-13	3.23329e-06	0	0
765	6020	HCD	436.566	0	0.349518	3	R	IQEYEKQLEK	M	sp|Q9DCX2|ATP5H_MOUSE	131	131	1.69788e-13	3.18086e-06	0	0
766	15089	HCD	674.37	0	-3.89178	2	K	ALIAAQYSGAQVR	V	sp|Q9D8N0|EF1G_MOUSE	117	98	1.75219e-13	3.32054e-06	0	0
767	11298	HCD	552.291	1	-11.2409	3	K	C+57.021KVNNKDLPAPIER	T	sp|P01865|GCAM_MOUSE	122	87	1.75306e-13	3.33206e-06	0	0
768	16539	HCD	817.41	0	-5.37614	2	K	VNQIGSVTESLQAC+57.021K	L	sp|P17182|ENOA_MOUSE	61	41	1.8108e-13	3.45109e-06	0	0
769	16539	HCD	817.41	0	-5.37614	2	K	VNQIGSVTESIQAC+57.021K	L	sp|P21550|ENOB_MOUSE	61	41	1.8108e-13	3.45109e-06	0	0
770	17456	HCD	622.831	1	-13.3854	2	R	VNSAAFPAPIEK	T	sp|P01869|IGH1M_MOUSE	149	127	1.81297e-13	3.42429e-06	0	0
771	31992	HCD	734.376	1	-4.62767	3	R	VVSALPIQHQDWMSGKEFK	C	sp|P01865|GCAM_MOUSE	127	63	1.81671e-13	3.49338e-06	0	0
772	18848	HCD	515.258	0	0.947645	2	R	MFASFPTTK	T	sp|P01942|HBA_MOUSE	121	121	1.90655e-13	3.55295e-06	0	0
773	19044	HCD	515.258	0	1.42147	2	R	MFASFPTTK	T	sp|P01942|HBA_MOUSE	121	121	1.90655e-13	3.55295e-06	0	0
774	24822	HCD	991.5	0	-2.58545	2	K	TVTNAVVTVPAYFNDSQR	Q	sp|P63017|HSP7C_MOUSE	178	114	1.90969e-13	3.66477e-06	0	0
775	17274	HCD	550.807	0	-3.10268	2	R	FIGPSPEVVR	K	sp|Q05920|PYC_MOUSE	98	97	1.91792e-13	3.5931e-06	0	0
776	15246	HCD	657.844	0	1.02059	2	K	LTPEEEEILNK	K	sp|P62242|RS8_MOUSE	101	99	1.92142e-13	3.61549e-06	0	0
777	11493	HCD	524.947	0	1.62777	3	R	KLDPGSEETQTLVR	E	sp|Q9D8N0|EF1G_MOUSE	99	84	1.93524e-13	3.67834e-06	0	0
778	13459	HCD	554.29	0	1.76183	2	R	ESATVTC+57.021LVK	G	sp|P01872|IGHM_MOUSE	113	110	1.98528e-13	3.71929e-06	0	0
779	35976	HCD	1062.21	1	-0.78488	3	R	TTGIVMDSGDGVTHTVPIYEGYALPHAILR	L	sp|P60710|ACTB_MOUSE	145	51	2.01022e-13	3.93433e-06	0	0
780	21539	HCD	713.315	0	-3.42261	2	R	DDGSWEVIEGYR	A	sp|P26443|DHE3_MOUSE	98	89	2.02999e-13	3.83419e-06	0	0
781	19756	HCD	599.857	0	1.42449	2	R	AVFPSIVGRPR	H	sp|P60710|ACTB_MOUSE	89	84	2.04341e-13	3.84502e-06	0	0
782	32420	HCD	995.03	1	8.01003	2	R	AIAELGIYPAVDPLDSTSR	I	sp|P56480|ATPB_MOUSE	139	78	2.06013e-13	3.96144e-06	0	0
783	11659	HCD	674.79	0	-8.23094	2	R	SEDTALYYC+57.021AR	L	sp|P01808|HVM38_MOUSE	111	102	2.0604e-13	3.877e-06	0	0
784	6380	HCD	543.238	0	1.2359	2	K	TDSFSC+57.021NVR	H	sp|P01867|IGG2B_MOUSE	129	129	2.0654e-13	3.84897e-06	0	0
785	11832	HCD	552.96	0	6.29164	3	R	VAESTEEVSSLRPPR	L	sp|Q8BX70|VP13C_MOUSE	140	101	2.10012e-13	4.00248e-06	0	0
786	15135	HCD	738.889	1	-12.3561	2	R	FLEQQNQVLQTK	W	sp|Q6IFZ6|K2C1B_MOUSE	113	89	2.10742e-13	3.98044e-06	0	0
787	7909	HCD	545.769	0	0.447333	2	R	VTMQNLNDR	L	sp|P02535|K1C10_MOUSE	147	141	2.13263e-13	3.97425e-06	0	0
788	21616	HCD	543.3	0	-16.7386	3	R	QATKDAGTIAGLNVLR	I	sp|P63017|HSP7C_MOUSE	101	82	2.15475e-13	4.11677e-06	0	0
789	3724	HCD	666.308	0	1.28243	2	R	QLEEAEEEAQR	A	sp|Q8VDD5|MYH9_MOUSE	74	65	2.16618e-13	4.07604e-06	0	0
790	35380	HCD	715.05	0	-5.2068	3	K	MGLINKEEVLLPLDNPYGK	I	sp|P25688|URIC_MOUSE	89	46	2.16642e-13	4.16584e-06	0	0
791	13735	HCD	576.32	1	-14.9966	2	R	TFGGGTKLEIK	R	sp|P01645|KV5AC_MOUSE	67	62	2.20916e-13	4.15692e-06	0	0
792	20684	HCD	578.341	0	1.16089	2	R	LVEVNLNNIK	N	sp|Q9JHJ0|TMOD3_MOUSE	114	114	2.2265e-13	4.17121e-06	0	0
793	22318	HCD	583.85	0	2.9271	2	R	AVAQALEVIPR	T	sp|P80318|TCPG_MOUSE	126	125	2.24035e-13	4.2156e-06	0	0
794	14172	HCD	569.275	0	-3.75253	2	K	ESYSVYVYK	V	sp|Q64475|H2B1B_MOUSE	113	113	2.26292e-13	4.21706e-06	0	0
795	22970	HCD	914.97	1	5.24057	2	R	APQVYVLPPPEEEMTK	K	sp|P01865|GCAM_MOUSE	157	99	2.32717e-13	4.44619e-06	0	0
796	4097	HCD	442.403	1	-8.94301	5	R	NSYSC+57.021SVVHEGLHNHHTTK	S	sp|P01865|GCAM_MOUSE	148	68	2.35748e-13	4.53322e-06	0	0
797	23030	HCD	743.01	0	3.77872	3	K	DSTYSMSSTLTLTKDEYER	H	sp|P01837|IGKC_MOUSE	126	71	2.38423e-13	4.58466e-06	0	0
798	7310	HCD	411.883	0	0.444557	3	K	VSNRFSGVPDR	F	sp|P01631|KV2A7_MOUSE	117	106	2.38581e-13	4.48931e-06	0	0
799	11745	HCD	550.24	0	0.887397	2	R	VEFMDDTSR	S	sp|P62858|RS28_MOUSE	114	114	2.38787e-13	4.4499e-06	0	0
800	8306	HCD	503.514	0	-3.3335	4	K	ANHLNKLAEKEETGVAMR	I	sp|P21981|TGM2_MOUSE	93	58	2.3988e-13	4.60339e-06	0	0
801	19763	HCD	556.75	1	-5.21009	2	K	VC+57.021MYFTYK	V	sp|P83940|ELOC_MOUSE	88	88	2.43367e-13	4.50446e-06	0	0
802	16345	HCD	575.81	1	-4.93139	2	K	LVQEVTDFAK	T	sp|P07724|ALBU_MOUSE	83	83	2.43638e-13	4.5644e-06	0	0
803	11046	HCD	450.2	0	1.28795	3	R	SEDTALYYC+57.021AR	L	sp|P01808|HVM38_MOUSE	84	78	2.43675e-13	4.58516e-06	0	0
804	22047	HCD	543.3	0	-16.7386	3	R	QATKDAGTIAGLNVLR	I	sp|P63017|HSP7C_MOUSE	81	66	2.45088e-13	4.68255e-06	0	0
805	17878	HCD	583.7	0	6.274	3	R	AVVGVVAGGGRIDKPILK	A	sp|P62918|RL8_MOUSE	120	83	2.49272e-13	4.78362e-06	0	0
806	6812	HCD	554.27	0	1.76189	3	R	THQVSAAPTSSAGDGFK	A	sp|P32020|NLTP_MOUSE	131	81	2.53974e-13	4.86344e-06	0	0
807	20799	HCD	1227.09	1	1.3195	2	R	QVADEGDALVAGGVSQTPSYLSC+57.021K	S	sp|O35490|BHMT1_MOUSE	72	30	2.54736e-13	4.94157e-06	0	0
808	14455	HCD	513.761	1	-6.86302	4	R	LHDNPALKEC+57.021IQGADTIR	C	sp|P97784|CRY1_MOUSE	112	82	2.56661e-13	4.92542e-06	0	0
809	15792	HCD	516.942	0	-1.1807	3	R	MQKEITALAPSTMK	I	sp|P60710|ACTB_MOUSE	98	74	2.56695e-13	4.87902e-06	0	0
810	6557	HCD	560.962	0	1.41446	3	R	EGNHKPGTDYLKPPK	-	sp|Q61176|ARGI1_MOUSE	78	63	2.57375e-13	4.90514e-06	0	0
811	9509	HCD	572.795	0	-0.745896	2	K	VTLTPEEEAR	L	sp|P06151|LDHA_MOUSE	135	135	2.59323e-13	4.85824e-06	0	0
812	14856	HCD	461.22	0	-10.719	3	K	FAMKEMGTPDVR	I	sp|P62900|RL31_MOUSE	53	47	2.64946e-13	5.00424e-06	0	0
813	14124	HCD	657.33	1	-2.9255	2	K	SQLQEAPPEWK	A	sp|E9PV24|FIBA_MOUSE	96	91	2.667e-13	5.01842e-06	0	0
814	22941	HCD	743.39	1	4.21752	3	K	GSVRAPQVYVLPPPEEEMTK	K	sp|P01865|GCAM_MOUSE	133	69	2.71656e-13	5.2337e-06	0	0
815	12619	HCD	627.32	1	-10.0763	2	K	YQAVTATLEEK	R	sp|P19253|RL13A_MOUSE	77	71	2.7237e-13	5.1251e-06	0	0
816	19578	HCD	803.86	1	-7.48217	2	R	SLTSEDSAVYFC+57.021AR	S	sp|P01746|HVM02_MOUSE	153	101	2.72775e-13	5.18467e-06	0	0
817	7783	HCD	747.35	0	-3.51174	2	R	FNSANEDNVTQVR	T	sp|P24270|CATA_MOUSE	100	72	2.73076e-13	5.175e-06	0	0
818	30511	HCD	639.36	0	2.10019	2	K	LALDIEIATYR	K	sp|P03995|GFAP_MOUSE	98	91	2.83932e-13	5.34266e-06	0	0
819	17335	HCD	468.59	1	-14.3581	3	R	SKSDPIMLLKDR	M	sp|P35486|ODPA_MOUSE	105	94	2.88496e-13	5.44904e-06	0	0
820	14790	HCD	570.29	0	-10.2743	2	K	TYFQGSLPAR	A	sp|P52760|UK114_MOUSE	99	96	2.96156e-13	5.54828e-06	0	0
821	15858	HCD	749.415	0	-3.50207	2	K	LVESGGGLVQPGGSLK	L	sp|P18525|HVM54_MOUSE	112	86	3.06954e-13	5.86452e-06	0	0
822	7650	HCD	581.781	0	2.09822	2	K	EC+57.021IQGADTIR	C	sp|P97784|CRY1_MOUSE	105	103	3.07339e-13	5.75778e-06	0	0
823	21068	HCD	624.99	0	9.76588	3	K	ATLTVDKSSSATYMELR	S	sp|P06330|HVM51_MOUSE	92	66	3.07727e-13	5.89277e-06	0	0
824	21934	HCD	666.33	0	-7.23627	2	K	EGIEC+57.021EVINLR	T	sp|Q9D051|ODPB_MOUSE	108	101	3.1004e-13	5.83393e-06	0	0
825	17746	HCD	555.94	1	-8.75032	3	K	FDDPKFEVIDKPQS	-	sp|P97450|ATP5J_MOUSE	110	78	3.11556e-13	5.92178e-06	0	0
826	25105	HCD	919.957	1	11.3858	2	R	GAPGVSVDMNITYMSPAK	I	sp|Q9CQR4|ACO13_MOUSE	187	102	3.18514e-13	6.11239e-06	0	0
827	26763	HCD	581.83	1	-1.73057	2	K	SLEIIGAPFSK	G	sp|Q61176|ARGI1_MOUSE	114	112	3.26447e-13	6.14265e-06	0	0
828	10871	HCD	489.6	1	1.54	3	R	AYQKQPTIFQNK	K	sp|P62281|RS11_MOUSE	116	94	3.28129e-13	6.19762e-06	0	0
829	11517	HCD	645.83	1	6.85873	2	K	LVEEAIQC+57.021AEK	I	sp|Q8BH95|ECHM_MOUSE	97	96	3.30764e-13	6.22389e-06	0	0
830	11568	HCD	507.795	0	-0.240393	2	K	VTLVSAAPEK	L	sp|Q9CQR4|ACO13_MOUSE	110	110	3.39284e-13	6.35626e-06	0	0
831	11945	HCD	456.249	1	-13.9435	3	K	VNNKDLPAPIER	T	sp|P01865|GCAM_MOUSE	105	90	3.42731e-13	6.47343e-06	0	0
832	39600	HCD	944.508	0	2.1325	2	K	VLDFEHFLPMLQTVAK	N	sp|Q60605|MYL6_MOUSE	101	68	3.5151e-13	6.71578e-06	0	0
833	22502	HCD	613.34	0	-14.0311	2	R	QITLNDLPVGR	S	sp|O08807|PRDX4_MOUSE	80	75	3.60411e-13	6.78174e-06	0	0
834	22502	HCD	613.34	0	-14.0311	2	R	QITINDLPVGR	S	sp|P35700|PRDX1_MOUSE	80	75	3.60411e-13	6.78174e-06	0	0
835	6916	HCD	588.28	0	-0.207504	2	K	TIQGDEEDLR	-	sp|Q9DB05|SNAA_MOUSE	101	101	3.64716e-13	6.8327e-06	0	0
836	13500	HCD	440.232	0	4.50593	3	R	LSPVAEEFRDR	M	sp|Q00623|APOA1_MOUSE	100	95	3.69874e-13	6.9598e-06	0	0
837	8271	HCD	500.231	0	-2.07423	2	K	FMSTSVGDR	V	sp|P01633|KV5A1_MOUSE	137	137	3.72312e-13	6.93821e-06	0	0
838	9701	HCD	543.967	0	2.8051	3	R	ALAENSGVKANEVISK	L	sp|P42932|TCPQ_MOUSE	130	88	3.84032e-13	7.33715e-06	0	0
839	21898	HCD	575.8	0	3.07403	2	K	FAEAFEAIPR	A	sp|P42932|TCPQ_MOUSE	105	105	3.87557e-13	7.26063e-06	0	0
840	20756	HCD	785.749	0	-2.33033	3	K	GSVRAPQVYVLPPPEEEMTKK	Q	sp|P01865|GCAM_MOUSE	124	66	3.88718e-13	7.50266e-06	0	0
841	5371	HCD	469.92	0	-2.46779	3	K	AIKEKEYEIER	L	sp|E9Q557|DESP_MOUSE	85	85	3.92165e-13	7.37926e-06	0	0
842	17875	HCD	718.06	0	-3.05999	3	R	DAKLDKSQIHDIVLVGGSTR	I	sp|P63017|HSP7C_MOUSE	159	88	3.9507e-13	7.6114e-06	0	0
843	18486	HCD	437.922	0	-2.09061	3	K	FLVGPDGVPVRR	Y	sp|P11352|GPX1_MOUSE	134	109	4.01429e-13	7.5821e-06	0	0
844	10039	HCD	611.64	0	1.59663	3	R	LPAKPEVSSDEDVQYR	V	sp|Q8BMS1|ECHA_MOUSE	66	42	4.06081e-13	7.7584e-06	0	0
845	15891	HCD	729.35	1	-14.2764	2	K	GSGSGC+57.021VYLQTSLK	Y	sp|Q61838|PZP_MOUSE	96	73	4.09043e-13	7.77474e-06	0	0
846	13313	HCD	468.88	1	1.8035	3	R	MC+57.021HPSVDGFTPR	L	sp|Q8C196|CPSM_MOUSE	72	58	4.18913e-13	7.91233e-06	0	0
847	14771	HCD	610.828	0	-3.19749	2	K	KFDQLLAEEK	G	sp|Q61879|MYH10_MOUSE	101	101	4.19468e-13	7.85845e-06	0	0
848	25198	HCD	441.59	0	6.56534	3	K	ESGLYFIRPLK	A	sp|Q8VCM7|FIBG_MOUSE	71	67	4.45388e-13	8.38073e-06	0	0
849	14969	HCD	738.889	0	0.82604	2	R	FLEQQNQVLETK	W	sp|Q6IME9|K2C72_MOUSE	148	127	4.69832e-13	8.87406e-06	0	0
850	12690	HCD	697.862	1	-13.1705	2	R	TNAENEFVTIKK	D	sp|P04104|K2C1_MOUSE	97	68	4.70947e-13	8.89514e-06	0	0
851	25295	HCD	848.42	1	-11.9837	2	K	NAVITVPAYFNDSQR	Q	sp|P38647|GRP75_MOUSE	119	89	4.85276e-13	9.24857e-06	0	0
852	22467	HCD	577.57	0	2.32487	4	R	GPVRAPQVYVLPPPAEEMTKK	E	sp|P01864|GCAB_MOUSE	107	61	4.90927e-13	9.47541e-06	0	0
853	18217	HCD	613.34	0	-4.08001	3	K	LDKSQIHDIVLVGGSTR	I	sp|P63017|HSP7C_MOUSE	100	64	4.99244e-13	9.56019e-06	0	0
854	2591	HCD	436.89	0	-0.0698519	3	K	NKYEDEINKR	T	sp|Q6IFZ6|K2C1B_MOUSE	88	84	5.14189e-13	9.63299e-06	0	0
855	16767	HCD	464.58	0	0.131377	3	R	MVNHFIAEFKR	K	sp|P63017|HSP7C_MOUSE	80	75	5.21414e-13	9.81129e-06	0	0
856	2360	HCD	436.889	0	-0.977927	3	K	NKYEDEINKR	T	sp|Q6IFZ6|K2C1B_MOUSE	99	95	5.27037e-13	9.87368e-06	0	0
857	7959	HCD	448.205	1	-15.0116	3	R	ASNGDAWVEAHGK	L	sp|P38647|GRP75_MOUSE	78	57	5.3513e-13	1.01411e-05	0	0
858	18014	HCD	546.296	0	0.223451	2	-	VNFTVDQIR	A	sp|P58252|EF2_MOUSE	121	121	5.52472e-13	1.02956e-05	0	0
859	17872	HCD	698.83	1	-5.63588	2	R	DFTPVC+57.021TTELGR	A	sp|O08709|PRDX6_MOUSE	87	69	5.58621e-13	1.05511e-05	0	0
860	17720	HCD	622.83	1	-15.445	2	R	VNSAAFPAPIEK	T	sp|P01869|IGH1M_MOUSE	147	119	5.68997e-13	1.07471e-05	0	0
861	3819	HCD	618.761	0	0.88777	2	R	DGEEAGAYDGPR	T	sp|P27773|PDIA3_MOUSE	80	71	5.72904e-13	1.08209e-05	0	0
862	22513	HCD	557.61	1	3.10445	3	K	LSIEYDSEPFGKER	D	sp|P97784|CRY1_MOUSE	75	46	5.7371e-13	1.09046e-05	0	0
863	15342	HCD	718.87	1	3.01768	2	R	PC+57.021AENEFVTLKK	D	sp|Q99M74|KRT82_MOUSE	82	70	5.86089e-13	1.10699e-05	0	0
864	20503	HCD	626.313	0	-0.974515	2	K	GVLFYGPPGC+57.021GK	T	sp|Q01853|TERA_MOUSE	106	94	5.9146e-13	1.11714e-05	0	0
865	21030	HCD	643.67	1	-5.37502	3	R	FNPVTGEVPPRYPLDAR	D	sp|Q91X72|HEMO_MOUSE	111	77	5.93605e-13	1.13671e-05	0	0
866	12149	HCD	462.93	1	6.18077	3	R	LIDKEVISPDTR	R	sp|Q9DCN2|NB5R3_MOUSE	78	73	5.94476e-13	1.12283e-05	0	0
867	6349	HCD	416.251	0	0.513208	4	K	AAGKGDVPTKRPPVLR	A	sp|P12970|RL7A_MOUSE	152	98	6.07694e-13	1.16103e-05	0	0
868	27548	HCD	889.99	0	-4.11476	2	R	APQVYILPPPAEQLSR	K	sp|P01867|IGG2B_MOUSE	171	116	6.34417e-13	1.21209e-05	0	0
869	10933	HCD	552.291	1	-12.2361	3	K	C+57.021KVNNKDLPAPIER	T	sp|P01865|GCAM_MOUSE	128	89	6.45187e-13	1.22631e-05	0	0
870	12519	HCD	442.59	0	1.37905	3	R	DNIQGITKPAIR	R	sp|P62806|H4_MOUSE	89	77	6.4839e-13	1.22466e-05	0	0
871	31762	HCD	995.02	1	-2.05489	2	R	AIAELGIYPAVDPLDSTSR	I	sp|P56480|ATPB_MOUSE	134	71	6.58911e-13	1.26703e-05	0	0
872	16143	HCD	454.239	0	2.62018	3	R	MSVEADINGLRR	V	sp|Q9QWL7|K1C17_MOUSE	145	120	6.71315e-13	1.26796e-05	0	0
873	6140	HCD	513.746	0	0.118804	2	R	TSYTNLDGR	C	sp|Q9CRB3|HIUH_MOUSE	86	86	6.71725e-13	1.25179e-05	0	0
874	15219	HCD	482.937	1	-13.2357	3	K	QGKSPQLLVYNAK	T	sp|P01635|KV5A3_MOUSE	89	78	6.75158e-13	1.27948e-05	0	0
875	28749	HCD	842.96	0	4.56158	2	R	AAVEEGIVLGGGC+57.021ALLR	C	sp|P63038|CH60_MOUSE	115	87	6.77419e-13	1.29721e-05	0	0
876	12570	HCD	624.81	1	-7.8904	4	R	ITNKVFANPEDC+57.021AGFGKGENAKK	F	sp|Q91VS7|MGST1_MOUSE	111	44	6.81413e-13	1.31971e-05	0	0
877	8406	HCD	422.89	0	-1.80411	3	K	EAIEGTYIDKK	C	sp|P62281|RS11_MOUSE	92	82	6.96446e-13	1.31048e-05	0	0
878	27128	HCD	889.99	0	-4.11476	2	R	APQVYILPPPAEQLSR	K	sp|P01867|IGG2B_MOUSE	170	109	7.10157e-13	1.35679e-05	0	0
879	6953	HCD	563.86	1	-3.98408	5	K	VIQWC+57.021THHKDDPPPPEDDENKEK	R	sp|Q9WTX5|SKP1_MOUSE	104	40	7.36302e-13	1.42602e-05	0	0
880	7027	HCD	716.808	1	-13.7595	2	K	YMC+57.021ENQATISSK	L	sp|P07724|ALBU_MOUSE	96	66	7.48346e-13	1.41346e-05	0	0
881	17514	HCD	566.821	0	-1.61519	2	K	SPQLLVYNAK	T	sp|P01635|KV5A3_MOUSE	112	112	7.67183e-13	1.43727e-05	0	0
882	17719	HCD	566.822	0	1.18448	2	K	SPQLLVYNAK	T	sp|P01635|KV5A3_MOUSE	134	134	7.67183e-13	1.43727e-05	0	0
883	11601	HCD	753.37	1	1.01478	2	R	AAAEVNQEYGLDPK	I	sp|P97807|FUMH_MOUSE	77	59	7.74344e-13	1.4718e-05	0	0
884	5705	HCD	511.707	0	-0.656026	2	K	YTC+57.021SFC+57.021GK	T	sp|P61514|RL37A_MOUSE	97	97	8.39439e-13	1.55371e-05	0	0
885	16380	HCD	903.45	0	-1.95917	2	K	NQVAMNPTNTVFDAKR	L	sp|P63017|HSP7C_MOUSE	92	48	8.52654e-13	1.62904e-05	0	0
886	7220	HCD	454.995	0	1.2073	4	R	VVRDTIKHIGYDDSAK	G	sp|Q91X83|METK1_MOUSE	84	59	8.53042e-13	1.62978e-05	0	0
887	17767	HCD	549.34	0	4.55538	2	K	GIIDPTKVVR	T	sp|P63038|CH60_MOUSE	111	111	8.54748e-13	1.60131e-05	0	0
888	18008	HCD	555.777	0	3.40442	2	R	TDLTDYLNR	H	sp|Q9CZ13|QCR1_MOUSE	114	114	8.55712e-13	1.59466e-05	0	0
889	13595	HCD	582.83	0	-8.16825	2	K	YKASIAALEAK	I	sp|Q8VDD5|MYH9_MOUSE	83	69	8.56887e-13	1.61238e-05	0	0
890	15170	HCD	403.88	0	-9.89839	3	R	RPVGASFSFGGK	L	sp|Q3UPL0|SC31A_MOUSE	65	61	8.63968e-13	1.63184e-05	0	0
891	22612	HCD	679.87	0	-4.39894	2	R	ASLQNLLSASQAR	L	sp|P35505|FAAA_MOUSE	87	74	8.68067e-13	1.64505e-05	0	0
892	9466	HCD	514.764	0	1.30426	2	K	TAVC+57.021DIPPR	G	sp|Q9CWF2|TBB2B_MOUSE	64	64	8.68925e-13	1.61928e-05	0	0
893	9838	HCD	835.437	0	-1.16892	2	K	C+57.021KVNNKDLPSPIER	T	sp|P01867|IGG2B_MOUSE	79	57	8.75457e-13	1.66399e-05	0	0
894	30376	HCD	813.45	1	-0.711954	2	R	TGAIVDVPVGEELLGR	V	sp|Q03265|ATPA_MOUSE	133	97	8.78472e-13	1.67837e-05	0	0
895	6083	HCD	527.786	0	0.578219	2	K	TPGPGAQSALR	A	sp|P62264|RS14_MOUSE	109	94	8.80341e-13	1.65651e-05	0	0
896	22299	HCD	661.36	0	1.19974	2	K	VLATAFDTTLGGR	K	sp|Q61316|HSP74_MOUSE	92	71	8.81374e-13	1.67027e-05	0	0
897	13613	HCD	568.843	0	-0.214594	2	K	LLLQVQHASK	Q	sp|P51881|ADT2_MOUSE	89	83	9.24651e-13	1.73227e-05	0	0
898	25010	HCD	991.5	0	-2.58545	2	K	TVTNAVVTVPAYFNDSQR	Q	sp|P63017|HSP7C_MOUSE	188	106	9.29822e-13	1.78436e-05	0	0
899	15852	HCD	509.771	0	0.658518	2	K	SVGEVMAIGR	T	sp|Q8C196|CPSM_MOUSE	100	94	9.50164e-13	1.78007e-05	0	0
900	27160	HCD	593.67	0	8.63611	3	R	APQVYILPPPAEQLSR	K	sp|P01867|IGG2B_MOUSE	97	70	9.64156e-13	1.84207e-05	0	0
901	27745	HCD	890.49	1	-5.99951	2	R	APQVYILPPPAEQLSR	K	sp|P01867|IGG2B_MOUSE	177	118	9.79455e-13	1.8713e-05	0	0
902	9908	HCD	480.762	0	-1.20607	2	K	VVAVDC+57.021GIK	N	sp|Q8C196|CPSM_MOUSE	101	101	9.86354e-13	1.83812e-05	0	0
903	11386	HCD	546.297	0	2.01106	2	K	TPQIQVYSR	H	sp|P01887|B2MG_MOUSE	103	103	9.91944e-13	1.84854e-05	0	0
904	11040	HCD	455.921	0	-1.00404	3	K	VNNKDLPAPIER	T	sp|P01865|GCAM_MOUSE	106	91	1.00353e-12	1.89544e-05	0	0
905	16885	HCD	462.927	0	0.527385	3	R	VC+57.021EEIAIIPSKK	L	sp|P63276|RS17_MOUSE	94	83	1.00358e-12	1.89553e-05	0	0
906	20571	HCD	534.78	1	-2.45415	2	R	AAPFTLEYR	V	sp|Q9D819|IPYR_MOUSE	96	96	1.00417e-12	1.87132e-05	0	0
907	20606	HCD	534.28	0	0.685429	2	R	AAPFTLEYR	V	sp|Q9D819|IPYR_MOUSE	86	86	1.00417e-12	1.87132e-05	0	0
908	8618	HCD	400.545	0	0.990472	3	R	GLC+57.021GAIHSSVAK	Q	sp|Q91VR2|ATPG_MOUSE	106	88	1.00617e-12	1.90042e-05	0	0
909	12550	HCD	549.793	0	0.111015	2	R	AIAEELAPER	G	sp|O35490|BHMT1_MOUSE	134	134	1.01097e-12	1.89398e-05	0	0
910	10910	HCD	522.782	0	0.233501	2	K	SGEIEPVSVK	V	sp|Q64433|CH10_MOUSE	85	85	1.02365e-12	1.91773e-05	0	0
911	6898	HCD	506.92	0	0.060202	3	K	NRVIGSGC+57.021NLDSAR	F	sp|P06151|LDHA_MOUSE	95	75	1.0352e-12	1.96761e-05	0	0
912	8038	HCD	477.58	0	-3.70621	3	K	VLGNPKSDEMNVK	V	sp|Q60605|MYL6_MOUSE	71	53	1.04246e-12	1.97555e-05	0	0
913	15795	HCD	555.97	0	2.08585	3	K	VTAEVVLVHPGGGSTSR	A	sp|Q91YQ5|RPN1_MOUSE	124	75	1.04798e-12	2.00681e-05	0	0
914	1299	HCD	510.97	1	1.76378	4	K	DEYERHNSYTC+57.021EATHK	T	sp|P01837|IGKC_MOUSE	77	44	1.08348e-12	2.07004e-05	0	0
915	14613	HCD	562.29	0	5.6445	2	K	STLTDSLVC+57.021K	A	sp|P58252|EF2_MOUSE	62	53	1.09621e-12	2.05368e-05	0	0
916	8384	HCD	592.34	0	-5.56417	2	K	ISKGANPVEIR	R	sp|P63038|CH60_MOUSE	76	69	1.12222e-12	2.11165e-05	0	0
917	22631	HCD	660.85	1	-10.2117	2	R	IMNTFSVVPSPK	V	sp|P68372|TBB4B_MOUSE	63	52	1.12935e-12	2.13309e-05	0	0
918	35838	HCD	535.29	0	-10.3759	4	R	EQIKSLNDKFASFIDKVR	F	sp|P04104|K2C1_MOUSE	122	58	1.13344e-12	2.1751e-05	0	0
919	39813	HCD	860.44	0	-0.425609	2	R	FLLQC+57.021LEDLDANLR	K	sp|P97784|CRY1_MOUSE	63	46	1.13573e-12	2.15869e-05	0	0
920	2621	HCD	480.883	0	0.190385	3	R	NIDEHANEDVER	M	sp|P61027|RAB10_MOUSE	72	59	1.15336e-12	2.17844e-05	0	0
921	13962	HCD	505.759	0	1.20681	2	K	TYGIC+57.021GAIR	R	sp|Q9CQR2|RS21_MOUSE	94	94	1.15487e-12	2.15216e-05	0	0
922	18243	HCD	541.804	0	2.02773	2	K	FASFIDKVR	F	sp|Q3UV17|K22O_MOUSE	129	129	1.17117e-12	2.18254e-05	0	0
923	18281	HCD	541.804	0	1.91508	2	K	FASFIDKVR	F	sp|Q3UV17|K22O_MOUSE	109	109	1.17117e-12	2.18254e-05	0	0
924	9320	HCD	419.89	0	6.46856	3	R	ALSTGEKGFGYK	G	sp|P17742|PPIA_MOUSE	78	65	1.17681e-12	2.22272e-05	0	0
925	11464	HCD	552.291	1	-10.7986	3	K	C+57.021KVNNKDLPAPIER	T	sp|P01865|GCAM_MOUSE	100	78	1.18146e-12	2.24562e-05	0	0
926	14208	HCD	828.98	1	3.27966	2	R	VLTVINQTQKENLR	K	sp|Q6ZWV7|RL35_MOUSE	93	67	1.24084e-12	2.35849e-05	0	0
927	19007	HCD	1072.04	1	4.0167	2	R	IADQC+57.021PSSLAIQENANALAR	Y	sp|Q91Y97|ALDOB_MOUSE	108	75	1.24603e-12	2.4006e-05	0	0
928	14496	HCD	502.754	0	2.06383	2	K	VWNLANC+57.021K	L	sp|P68040|RACK1_MOUSE	75	75	1.25984e-12	2.33183e-05	0	0
929	12371	HCD	489.955	0	7.22529	3	R	TRPTVAAGAVGLAQR	A	sp|P45952|ACADM_MOUSE	107	82	1.33222e-12	2.53899e-05	0	0
930	8779	HCD	596.784	0	1.5341	2	R	DETNYGIPQR	A	sp|P68040|RACK1_MOUSE	65	61	1.33328e-12	2.49781e-05	0	0
931	11063	HCD	647.85	0	-0.753694	2	R	MKQIYQQLSR	Y	sp|P97784|CRY1_MOUSE	113	107	1.3348e-12	2.50066e-05	0	0
932	10600	HCD	696.82	1	-3.19785	2	K	NFTDVHPDYGAR	I	sp|P24270|CATA_MOUSE	57	39	1.34027e-12	2.53147e-05	0	0
933	14831	HCD	538.28	0	-9.5246	2	K	AGDLGVDLTSK	V	sp|Q9DCW4|ETFB_MOUSE	88	82	1.35048e-12	2.54116e-05	0	0
934	7325	HCD	587.322	0	0.103921	2	R	EYTINIHKR	I	sp|P62900|RL31_MOUSE	100	99	1.36624e-12	2.54606e-05	0	0
935	10446	HCD	555.775	0	-0.768739	2	R	STTPDITGYR	I	sp|P11276|FINC_MOUSE	64	62	1.38307e-12	2.59109e-05	0	0
936	20494	HCD	640.321	0	2.383	3	R	RPSANC+57.021DPYAVTEAIVR	T	sp|P15105|GLNA_MOUSE	95	63	1.39065e-12	2.66301e-05	0	0
937	21679	HCD	624	0	1.95626	3	K	VASSVPVENFTIHGGLSR	I	sp|Q60597|ODO1_MOUSE	98	56	1.40594e-12	2.69805e-05	0	0
938	13495	HCD	496.762	0	1.78156	2	R	LNDFASAVR	I	sp|P12787|COX5A_MOUSE	135	135	1.43156e-12	2.66778e-05	0	0
939	21123	HCD	757.37	1	2.86418	2	K	SILEGSDEYLVC+57.021K	I	sp|P01872|IGHM_MOUSE	78	55	1.43156e-12	2.71292e-05	0	0
940	15920	HCD	551.79	0	-1.32735	2	R	EIDGGLETLR	L	sp|Q9DCW4|ETFB_MOUSE	101	101	1.4338e-12	2.68612e-05	0	0
941	19572	HCD	506.267	0	0.904195	2	R	AYALAFAER	G	sp|P51660|DHB4_MOUSE	143	143	1.44116e-12	2.68567e-05	0	0
942	36121	HCD	962.48	1	-1.80716	2	K	TLNDELEIIEGMKFDR	G	sp|P63038|CH60_MOUSE	73	44	1.4573e-12	2.78425e-05	0	0
943	7702	HCD	625.793	0	-1.07286	2	R	YNDLGEQHFK	G	sp|P07724|ALBU_MOUSE	80	71	1.47679e-12	2.76667e-05	0	0
944	16896	HCD	448.926	0	-0.0679791	3	R	TFIAIKPDGVQR	G	sp|Q01768|NDKB_MOUSE	109	86	1.53271e-12	2.89494e-05	0	0
945	17581	HCD	741.4	0	-9.63184	2	K	SQIHDIVLVGGSTR	I	sp|P63017|HSP7C_MOUSE	93	66	1.61528e-12	3.07019e-05	0	0
946	21095	HCD	777.88	1	7.10693	2	R	EAYPGDVFYLHSR	L	sp|Q03265|ATPA_MOUSE	95	66	1.62588e-12	3.08116e-05	0	0
947	9273	HCD	583.296	0	-0.523192	2	R	LENEIQTYR	S	sp|P02535|K1C10_MOUSE	137	137	1.63938e-12	3.05506e-05	0	0
948	17737	HCD	522.79	0	10.274	2	R	GNLC+57.021VNLVR	G	sp|P14106|C1QB_MOUSE	79	79	1.70175e-12	3.17129e-05	0	0
949	8513	HCD	501.272	0	-0.791443	2	R	VLNTNIDGR	R	sp|P62270|RS18_MOUSE	120	120	1.71269e-12	3.19168e-05	0	0
950	8627	HCD	501.272	0	0.304401	2	R	VLNTNIDGR	R	sp|P62270|RS18_MOUSE	134	134	1.71269e-12	3.19168e-05	0	0
951	8752	HCD	452.915	0	2.22356	3	R	SFGGVTHGLPEKK	M	sp|P50544|ACADV_MOUSE	58	47	1.71908e-12	3.25778e-05	0	0
952	16071	HCD	740.384	0	1.48387	3	K	TITVSQDEGVRPSTTMQGLAK	L	sp|Q8VCH0|THIKB_MOUSE	114	68	1.76652e-12	3.40956e-05	0	0
953	15917	HCD	739.38	1	-13.5043	2	R	FLEQQNQVLETK	W	sp|Q6IME9|K2C72_MOUSE	84	60	1.77035e-12	3.34379e-05	0	0
954	15846	HCD	508.296	0	5.46358	2	K	DVNAAIATIK	T	sp|P68369|TBA1A_MOUSE	107	106	1.80383e-12	3.37936e-05	0	0
955	39476	HCD	1159.64	1	14.4551	2	R	LIDMLSEAGLPVIEATSFVSPK	W	sp|P38060|HMGCL_MOUSE	96	52	1.82882e-12	3.53599e-05	0	0
956	20612	HCD	600.277	0	-4.57551	2	R	MGFPEAASSFR	T	sp|P32020|NLTP_MOUSE	96	74	1.85902e-12	3.49806e-05	0	0
957	3333	HCD	605.066	0	1.71485	4	R	VTAEDKGTGNKNKITITNDQNR	L	sp|P20029|GRP78_MOUSE	89	35	1.91e-12	3.69294e-05	0	0
958	17265	HCD	527.256	0	0.578801	2	K	ASLDMFNQK	T	sp|P54869|HMCS2_MOUSE	94	92	1.9742e-12	3.67902e-05	0	0
959	22560	HCD	641.88	0	3.80354	2	R	IDVVVNNAGILR	D	sp|P51660|DHB4_MOUSE	107	92	1.98362e-12	3.74661e-05	0	0
960	18099	HCD	552.291	1	-10.7986	3	K	C+57.021KVNNKDLPAPIER	T	sp|P01865|GCAM_MOUSE	91	75	2.00186e-12	3.80496e-05	0	0
961	5607	HCD	488.244	0	1.06258	3	R	DTIKHIGYDDSAK	G	sp|Q91X83|METK1_MOUSE	78	51	2.01677e-12	3.82194e-05	0	0
962	4948	HCD	616.051	1	-6.91238	4	R	SSAGTGLSSGKRPSQEEDAQSVGPK	V	sp|P97784|CRY1_MOUSE	231	95	2.05378e-12	3.99037e-05	0	0
963	7833	HCD	581.25	0	-7.87544	2	K	NLDDGIDDER	L	sp|P29341|PABP1_MOUSE	66	65	2.11993e-12	3.97155e-05	0	0
964	17447	HCD	593.32	0	8.84695	2	R	AEAGDNLGALVR	G	sp|Q8BFR5|EFTU_MOUSE	70	60	2.13074e-12	4.0245e-05	0	0
965	14490	HCD	468.874	1	-11.9395	3	R	MC+57.021HPSVDGFTPR	L	sp|Q8C196|CPSM_MOUSE	80	61	2.15908e-12	4.07802e-05	0	0
966	6529	HCD	412.889	0	3.69563	3	R	VITEEEKNFK	A	sp|P47963|RL13_MOUSE	56	49	2.18461e-12	4.09271e-05	0	0
967	10899	HCD	439.91	0	11.0997	3	R	SLNESKIEIER	L	sp|E9Q557|DESP_MOUSE	104	94	2.1897e-12	4.1203e-05	0	0
968	6308	HCD	547.26	1	-9.22397	3	K	NNIHC+57.021NTIAPNAGSR	M	sp|P51660|DHB4_MOUSE	125	87	2.19322e-12	4.17991e-05	0	0
969	7636	HCD	509.264	0	-0.599248	2	R	VVDDELATR	F	sp|Q8BKZ9|ODPX_MOUSE	124	124	2.19783e-12	4.09576e-05	0	0
970	15957	HCD	452.913	0	-2.0888	3	R	VTAIYIDPATHR	Q	sp|P19096|FAS_MOUSE	61	50	2.2164e-12	4.18628e-05	0	0
971	9245	HCD	544.303	0	-0.560672	2	K	VIEASEIQAK	C	sp|Q63836|SBP2_MOUSE	99	99	2.22076e-12	4.16045e-05	0	0
972	22284	HCD	689.36	1	15.5517	2	K	YMASSYLTLTAR	A	sp|P01843|LAC1_MOUSE	98	63	2.27177e-12	4.29086e-05	0	0
973	8113	HCD	483.919	0	-0.75676	3	R	DGKLVSESSDVVSK	-	sp|P11679|K2C8_MOUSE	104	79	2.30774e-12	4.38636e-05	0	0
974	21929	HCD	555.98	1	-8.96937	3	K	VIIVVKDGPGFYTTR	C	sp|Q8BMS1|ECHA_MOUSE	117	63	2.32559e-12	4.43219e-05	0	0
975	17881	HCD	567.35	0	-0.215159	2	K	IKLTITYGPK	V	sp|P12710|FABPL_MOUSE	72	67	2.32956e-12	4.36427e-05	0	0
976	7615	HCD	484.245	0	2.3948	3	K	VVGDVAYDEAKER	A	sp|Q922D8|C1TC_MOUSE	78	57	2.38041e-12	4.51105e-05	0	0
977	10760	HCD	430.547	0	0.212643	3	R	LGADMEDLRNR	L	sp|P08226|APOE_MOUSE	113	95	2.39314e-12	4.50309e-05	0	0
978	6546	HCD	425.2	1	-16.9826	4	K	SNNYATHYAESVKGR	F	sp|P01801|HVM32_MOUSE	66	42	2.42241e-12	4.61672e-05	0	0
979	21612	HCD	520.3	0	10.0886	2	R	YIATPIFSK	M	sp|P10649|GSTM1_MOUSE	104	104	2.45476e-12	4.57457e-05	0	0
980	5482	HCD	511.707	0	-0.715665	2	K	YTC+57.021SFC+57.021GK	T	sp|P61514|RL37A_MOUSE	58	56	2.51832e-12	4.66113e-05	0	0
981	8247	HCD	422.221	0	-3.54164	3	K	ISSDLDGHPVPK	Q	sp|P40142|TKT_MOUSE	87	69	2.5418e-12	4.80088e-05	0	0
982	12048	HCD	461.58	1	-15.4364	3	K	VNNKDLPSPIER	T	sp|P01867|IGG2B_MOUSE	102	84	2.55183e-12	4.81983e-05	0	0
983	15137	HCD	509.26	0	-1.61798	3	R	NDAKNTLYLQMSK	V	sp|P01812|HVM42_MOUSE	67	59	2.58421e-12	4.89727e-05	0	0
984	18031	HCD	492.275	0	1.30185	2	R	HGSLGFLPR	K	sp|P27659|RL3_MOUSE	136	136	2.62596e-12	4.89361e-05	0	0
985	14965	HCD	818.88	0	0.670814	2	K	MDATANDVPSPYEVK	G	sp|P27773|PDIA3_MOUSE	89	54	2.65396e-12	5.05801e-05	0	0
986	13950	HCD	504.961	0	-3.32394	3	K	RKTSGPPVSELITK	A	sp|P43274|H14_MOUSE	88	65	2.67351e-12	5.08157e-05	0	0
987	15729	HCD	536.3	0	-4.89371	2	R	VITIMQNPR	Q	sp|P62270|RS18_MOUSE	94	92	2.69499e-12	5.02224e-05	0	0
988	19706	HCD	525.78	1	-1.91523	2	R	YSVDIPLDK	T	sp|P61358|RL27_MOUSE	109	109	2.69631e-12	5.0247e-05	0	0
989	21560	HCD	703.39	0	2.95029	2	K	EIKDILIQYDR	T	sp|P14131|RS16_MOUSE	85	75	2.70186e-12	5.084e-05	0	0
990	20674	HCD	978.51	0	-0.998009	2	R	APQVYVLPPPEEEMTKK	Q	sp|P01865|GCAM_MOUSE	157	76	2.73535e-12	5.23802e-05	0	0
991	18330	HCD	456.798	0	0.801692	2	K	VGLQVVAVK	A	sp|P63038|CH60_MOUSE	138	138	2.73902e-12	5.10429e-05	0	0
992	10189	HCD	494.774	0	-2.03543	2	R	SAINEVVTR	E	sp|P62900|RL31_MOUSE	135	135	2.75959e-12	5.14262e-05	0	0
993	3749	HCD	431.726	0	0.0706873	4	K	LSEENRHLRDEGLR	L	sp|Q9WV55|VAPA_MOUSE	110	66	2.80734e-12	5.33595e-05	0	0
994	12691	HCD	677.871	0	1.53067	2	R	ALGQNPTNAEVLK	V	sp|Q60605|MYL6_MOUSE	71	56	2.86532e-12	5.43001e-05	0	0
995	8647	HCD	531.62	0	-4.82199	3	K	TPKEAIEGTYIDKK	C	sp|P62281|RS11_MOUSE	74	51	2.8713e-12	5.45751e-05	0	0
996	15053	HCD	677.856	1	-16.2627	2	R	GQNQPVLNITNR	Q	sp|Q8C196|CPSM_MOUSE	100	77	2.92218e-12	5.51934e-05	0	0
997	11769	HCD	566.637	0	1.18486	3	R	DGRGAAQNIIPASTGAAK	A	sp|P16858|G3P_MOUSE	102	71	2.94208e-12	5.64596e-05	0	0
998	11467	HCD	610.804	0	0.699482	2	K	ASLENSLEETK	G	sp|Q9Z2K1|K1C16_MOUSE	78	69	2.95446e-12	5.55932e-05	0	0
999	9902	HCD	508.279	0	-2.40163	2	K	VLVDVSNNR	K	sp|Q923B6|STEA4_MOUSE	74	74	2.95893e-12	5.51411e-05	0	0
1000	22240	HCD	557.28	0	11.1715	3	K	LSIEYDSEPFGKER	D	sp|P97784|CRY1_MOUSE	64	40	2.9976e-12	5.69758e-05	0	0
1001	14114	HCD	537.78	0	1.36194	2	R	HAVAC+57.021FLTR	G	sp|P97784|CRY1_MOUSE	99	89	3.04853e-12	5.68108e-05	0	0
1002	5862	HCD	540.26	0	0.112974	2	R	AQYEDIANR	S	sp|P11679|K2C8_MOUSE	100	99	3.07652e-12	5.73325e-05	0	0
1003	23187	HCD	894.97	1	1.12708	2	K	TITLEVEPSDTIENVK	A	sp|P62984|RL40_MOUSE	127	82	3.08814e-12	5.90006e-05	0	0
1004	9730	HCD	552.3	1	4.793	3	K	C+57.021KVNNKDLPAPIER	T	sp|P01865|GCAM_MOUSE	124	84	3.12525e-12	5.9402e-05	0	0
1005	20580	HCD	569.31	1	9.391	2	K	GYFPEPVTVK	W	sp|P03987|IGHG3_MOUSE	67	63	3.15862e-12	5.91746e-05	0	0
1006	3503	HCD	511.91	0	-4.70957	3	K	SMAENRHLQYER	F	sp|Q9DD20|MET7B_MOUSE	45	40	3.16756e-12	5.98281e-05	0	0
1007	19154	HCD	468.914	0	0.520651	3	K	YYVTIIDAPGHR	D	sp|P10126|EF1A1_MOUSE	78	58	3.16759e-12	5.98287e-05	0	0
1008	9192	HCD	479.754	0	-2.67165	2	R	LIPDGC+57.021GVK	Y	sp|Q6ZWV3|RL10_MOUSE	95	92	3.17298e-12	5.91299e-05	0	0
1009	32736	HCD	486.27	1	-10.0049	3	R	RHPDYSVSLLLR	L	sp|P07724|ALBU_MOUSE	75	59	3.2197e-12	6.08129e-05	0	0
1010	1463	HCD	511.52	0	8.82984	4	K	MVEKDQDGGRKLTPQGQR	D	sp|Q9CZX8|RS19_MOUSE	90	48	3.24284e-12	6.22312e-05	0	0
1011	13538	HCD	602.82	0	9.82129	2	R	ISHTLYDLDK	I	sp|P97784|CRY1_MOUSE	52	47	3.2882e-12	6.16023e-05	0	0
1012	9539	HCD	544.939	1	-11.7288	3	K	ISGQKVNEAAC+57.021DIAR	Q	sp|O35490|BHMT1_MOUSE	158	97	3.31516e-12	6.31815e-05	0	0
1013	9910	HCD	483.91	0	5.10826	3	R	SSDGAREPQFISR	N	sp|P29788|VTNC_MOUSE	102	74	3.36255e-12	6.37228e-05	0	0
1014	19516	HCD	642.85	0	10.2541	2	K	DIPGLTDTTVPR	R	sp|P62754|RS6_MOUSE	65	52	3.38447e-12	6.39251e-05	0	0
1015	17071	HCD	520.93	1	-17.7799	3	K	C+57.021RVNSAAFPAPIEK	T	sp|P01869|IGH1M_MOUSE	97	69	3.44624e-12	6.5503e-05	0	0
1016	13439	HCD	493.757	0	0.679877	2	R	GQPADVFPR	L	sp|P97784|CRY1_MOUSE	121	117	3.4568e-12	6.44191e-05	0	0
1017	13615	HCD	493.757	0	1.66879	2	R	GQPADVFPR	L	sp|P97784|CRY1_MOUSE	122	119	3.4568e-12	6.44191e-05	0	0
1018	13778	HCD	493.75	0	-12.794	2	R	GQPADVFPR	L	sp|P97784|CRY1_MOUSE	96	91	3.4568e-12	6.44191e-05	0	0
1019	10985	HCD	598.25	1	1.27812	2	R	DNC+57.021C+57.021ILDER	F	sp|Q8VCM7|FIBG_MOUSE	103	98	3.47355e-12	6.47313e-05	0	0
1020	24517	HCD	600.34	0	-1.22001	2	K	DAGTIAGLNVLR	I	sp|P63017|HSP7C_MOUSE	85	70	3.53182e-12	6.67082e-05	0	0
1021	30805	HCD	539.31	1	0.378777	3	R	LFVIRGQPADVFPR	L	sp|P97784|CRY1_MOUSE	66	43	3.55198e-12	6.75129e-05	0	0
1022	18267	HCD	565.8	0	-2.26535	2	R	FPGQLNADLR	K	sp|A2AQ07|TBB1_MOUSE	70	70	3.56407e-12	6.67705e-05	0	0
1023	20139	HCD	513.801	0	-0.356374	2	K	AVDSLVPIGR	G	sp|Q03265|ATPA_MOUSE	110	110	3.58845e-12	6.72272e-05	0	0
1024	20317	HCD	513.801	0	0.83154	2	K	AVDSLVPIGR	G	sp|Q03265|ATPA_MOUSE	112	112	3.58845e-12	6.72272e-05	0	0
1025	18776	HCD	552.3	1	4.793	3	K	C+57.021KVNNKDLPAPIER	T	sp|P01865|GCAM_MOUSE	95	61	3.66316e-12	6.96261e-05	0	0
1026	18049	HCD	581.3	0	2.41495	2	R	SLVFPEAENR	K	sp|P11725|OTC_MOUSE	89	83	3.73317e-12	6.99384e-05	0	0
1027	16943	HCD	593.85	0	-1.33612	2	K	QHGIPIPVTPK	S	sp|P16460|ASSY_MOUSE	44	39	3.78393e-12	7.12012e-05	0	0
1028	5717	HCD	560.26	1	-14.7726	2	K	VNEAAC+57.021DIAR	Q	sp|O35490|BHMT1_MOUSE	84	76	3.78748e-12	7.09558e-05	0	0
1029	25922	HCD	550.832	0	0.110805	2	K	DVLTITLTPK	V	sp|P01869|IGH1M_MOUSE	130	130	3.89655e-12	7.29993e-05	0	0
1030	26113	HCD	550.832	0	0.110805	2	K	DVLTITLTPK	V	sp|P01869|IGH1M_MOUSE	133	133	3.89655e-12	7.29993e-05	0	0
1031	25557	HCD	550.832	0	0.775638	2	K	DVLTITLTPK	V	sp|P01869|IGH1M_MOUSE	129	129	3.89655e-12	7.29993e-05	0	0
1032	25741	HCD	550.832	0	0.443222	2	K	DVLTITLTPK	V	sp|P01869|IGH1M_MOUSE	127	127	3.89655e-12	7.29993e-05	0	0
1033	15810	HCD	441.57	0	-8.2242	3	R	TTLLAGDIEHPR	A	sp|Q91ZX7|LRP1_MOUSE	72	60	4.11379e-12	7.77003e-05	0	0
1034	9298	HCD	422.228	0	0.361388	3	R	HEGLKNYYLK	K	sp|P01867|IGG2B_MOUSE	108	86	4.15813e-12	7.78997e-05	0	0
1035	6240	HCD	572.635	0	-1.81197	3	R	ASREEILAQAKENEK	K	sp|Q8VDD5|MYH9_MOUSE	88	60	4.19615e-12	7.99718e-05	0	0
1036	5455	HCD	533.264	0	0.457823	2	K	AQYEDIAQK	S	sp|Q3UV17|K22O_MOUSE	108	107	4.21795e-12	7.86034e-05	0	0
1037	14327	HCD	811.86	1	-4.24895	2	R	SLTSEDSAVYYC+57.021AR	G	sp|P06330|HVM51_MOUSE	95	56	4.25061e-12	8.07918e-05	0	0
1038	13044	HCD	450.2	1	5.54162	3	R	HNSYTC+57.021EATHK	T	sp|P01837|IGKC_MOUSE	45	35	4.25489e-12	8.0063e-05	0	0
1039	12546	HCD	765.37	1	-13.1253	2	R	HVLQQFADNDVSR	F	sp|P51660|DHB4_MOUSE	161	113	4.28202e-12	8.11475e-05	0	0
1040	6075	HCD	560.259	1	-17.4985	2	K	VNEAAC+57.021DIAR	Q	sp|O35490|BHMT1_MOUSE	140	116	4.32758e-12	8.10743e-05	0	0
1041	22329	HCD	666.85	0	1.46444	2	K	SFENSLGINVPR	S	sp|Q91ZJ5|UGPA_MOUSE	56	42	4.42376e-12	8.35548e-05	0	0
1042	12490	HCD	532.81	0	2.63473	2	R	LASYLDKVR	A	sp|Q9QWL7|K1C17_MOUSE	62	59	4.51289e-12	8.40998e-05	0	0
1043	33184	HCD	712.73	1	5.34148	3	K	ALPGHLKPFETLLSQNQGGK	A	sp|P46425|GSTP2_MOUSE	84	46	4.52426e-12	8.71642e-05	0	0
1044	6437	HCD	488.601	0	1.31164	3	K	ARVITEEEKNFK	A	sp|P47963|RL13_MOUSE	82	60	4.55818e-12	8.60937e-05	0	0
1045	12757	HCD	449.25	0	11.0048	2	R	FFVANTAK	E	sp|Q9Z2I8|SUCB2_MOUSE	78	78	4.63539e-12	8.57961e-05	0	0
1046	10799	HCD	724.372	0	-0.926852	2	K	ATSPSTLVSTGPSSR	S	sp|P27546|MAP4_MOUSE	79	60	4.66567e-12	8.892e-05	0	0
1047	10845	HCD	569.786	0	1.0712	2	K	EAIEGTYIDK	K	sp|P62281|RS11_MOUSE	76	73	4.70413e-12	8.81288e-05	0	0
1048	14596	HCD	405.226	0	3.76552	3	-	GVNAVHWFRK	G	sp|P97784|CRY1_MOUSE	75	68	4.81359e-12	9.01794e-05	0	0
1049	16525	HCD	614.823	1	-1.0415	2	R	DTSKNQFFLK	L	sp|P18531|HVM60_MOUSE	72	57	4.81763e-12	9.0255e-05	0	0
1050	17930	HCD	500.791	0	-2.86411	2	R	VLSIGDGIAR	V	sp|Q03265|ATPA_MOUSE	116	105	4.86104e-12	9.10684e-05	0	0
1051	24126	HCD	992.46	1	-3.5369	2	K	AANEAGYFNEEMAPIEVK	T	sp|Q8BWT1|THIM_MOUSE	102	38	5.06714e-12	9.72402e-05	0	0
1052	14221	HCD	592.79	1	-2.03348	4	R	ITNKVFANPEDC+57.021AGFGKGENAK	K	sp|Q91VS7|MGST1_MOUSE	102	42	5.12875e-12	9.91631e-05	0	0
1053	4298	HCD	492.259	0	0.681945	3	R	NKSTESLQANVQR	L	sp|P47963|RL13_MOUSE	76	62	5.14019e-12	9.74105e-05	0	0
1054	22488	HCD	748.06	0	-2.61091	3	K	IIAEGANGPTTPEADKIFLER	N	sp|P26443|DHE3_MOUSE	97	43	5.25099e-12	0.00010135	0	0
1055	34249	HCD	887	0	1.2386	2	R	GALVIVNDLGGDFKGIGK	G	sp|P51660|DHB4_MOUSE	89	39	5.25933e-12	0.000100928	0	0
1056	8531	HCD	474.75	0	3.1498	2	R	FNENAVVR	N	sp|O08573|LEG9_MOUSE	100	100	5.35122e-12	9.90453e-05	0	0
1057	19237	HCD	734.11	0	3.90768	4	K	ASGKPVAATMC+57.021IGPEGDLHGVPPGEC+57.021AVR	L	sp|O35490|BHMT1_MOUSE	143	59	5.4104e-12	0.000105743	0	0
1058	18181	HCD	910.948	1	-10.6244	2	K	IVSNASC+57.021TTNC+57.021LAPLAK	V	sp|P16858|G3P_MOUSE	102	51	5.46354e-12	0.000104623	0	0
1059	4881	HCD	546.931	0	0.223192	3	K	NNIHC+57.021NTIAPNAGSR	M	sp|P51660|DHB4_MOUSE	106	64	5.50184e-12	0.000104856	0	0
1060	13272	HCD	572.768	0	-2.02467	2	K	SSSATYMELR	S	sp|P06330|HVM51_MOUSE	104	79	5.59056e-12	0.000104735	0	0
1061	6316	HCD	533.218	0	1.94592	2	K	NMMAAC+57.021DPR	H	sp|Q9CWF2|TBB2B_MOUSE	78	70	5.75339e-12	0.000107217	0	0
1062	7559	HCD	450.2	0	2.10139	3	R	SEDTALYYC+57.021AR	L	sp|P01808|HVM38_MOUSE	77	64	5.76472e-12	0.000108473	0	0
1063	36796	HCD	435.24	1	-9.9859	3	R	SLDLDSIIAEVK	A	sp|P50446|K2C6A_MOUSE	77	68	5.89963e-12	0.000111431	0	0
1065	25117	HCD	688	0	-0.975852	3	R	FSGVPDRFSGSGSGTDFTLK	I	sp|P01631|KV2A7_MOUSE	112	64	5.90904e-12	0.000113843	0.000788644	0
1066	14542	HCD	811.855	1	-10.0413	2	R	SLTSEDSAVYYC+57.021AR	G	sp|P06330|HVM51_MOUSE	168	97	6.09706e-12	0.000115888	0.000788644	0
1067	13560	HCD	513.305	0	3.32939	2	R	GTGIVSAPVPK	K	sp|P25444|RS2_MOUSE	79	70	6.18291e-12	0.000116342	0.000788644	0.00119904
1068	20960	HCD	881.45	1	-3.99378	3	K	LDQGGAPLAGTNKETTIQGLDGLSER	C	sp|Q91Y97|ALDOB_MOUSE	109	42	6.18774e-12	0.000120409	0.000788644	0
1069	19317	HCD	488.78	1	-1.62285	2	K	YDGIILPGK	-	sp|Q9CXW4|RL11_MOUSE	79	79	6.25767e-12	0.000116615	0.000788644	0.00119904
1070	13907	HCD	576.32	1	-14.9966	2	R	TFGGGTKLEIK	R	sp|P01645|KV5AC_MOUSE	57	52	6.27953e-12	0.00011816	0.000788644	0
1071	10830	HCD	416.22	0	0.219962	3	R	LVEDMENKIR	S	sp|P47757|CAPZB_MOUSE	113	99	6.29668e-12	0.000117964	0.000788644	0.00119904
1072	4384	HCD	737.885	0	0.909881	2	R	NKSTESLQANVQR	L	sp|P47963|RL13_MOUSE	121	88	6.32006e-12	0.00011977	0.000788644	0
1073	19761	HCD	641.8	0	9.41498	2	R	TVEPMGEMFNK	A	sp|P06728|APOA4_MOUSE	58	42	6.39112e-12	0.00012026	0.000788644	0.00119904
1074	12998	HCD	525.95	0	-5.91838	3	K	RGNNTTSLLSQSVAK	G	sp|Q9DB77|QCR2_MOUSE	73	51	6.45481e-12	0.000123018	0.000788644	0.00119904
1075	19080	HCD	543.3	0	-5.84173	2	K	LLIYSASYR	Y	sp|P01633|KV5A1_MOUSE	102	102	6.48311e-12	0.000120816	0.000788644	0.00119904
1076	19261	HCD	543.3	0	-5.84173	2	K	LLIYSASYR	Y	sp|P01633|KV5A1_MOUSE	139	139	6.48311e-12	0.000120816	0.000788644	0.00119904
1077	14801	HCD	482.61	0	3.0985	3	K	QGKSPQLLVYNAK	T	sp|P01635|KV5A3_MOUSE	69	54	6.6807e-12	0.000126604	0.000788644	0
1078	8881	HCD	407.56	0	0.59903	3	R	RHWGGNVLGPK	S	sp|P12970|RL7A_MOUSE	64	57	6.81032e-12	0.000128148	0.000788644	0.00119904
1079	7964	HCD	501.78	0	6.14272	2	K	LITEDVQGK	N	sp|P97351|RS3A_MOUSE	96	94	6.82297e-12	0.000127149	0.000788644	0.00119904
1080	13741	HCD	462.246	0	2.17867	2	R	FSGSLIGDK	A	sp|P01727|LV1E_MOUSE	107	107	6.91804e-12	0.000128921	0.000788644	0.00119904
1081	1893	HCD	492.899	0	0.742974	3	K	LEEAEKAADESER	G	sp|P58774|TPM2_MOUSE	47	36	6.94743e-12	0.000131659	0.000788644	0.00119904
1082	10113	HCD	551.963	0	-0.221157	3	K	C+57.021KVNNKDLPAPIER	T	sp|P01865|GCAM_MOUSE	71	49	6.96419e-12	0.000132369	0.000788644	0
1083	14524	HCD	473.257	0	2.64386	2	R	GFLPPASEK	H	sp|O35490|BHMT1_MOUSE	99	95	7.02835e-12	0.000130977	0.000788644	0.00119904
1084	14160	HCD	473.255	0	-1.09623	2	R	GFLPPASEK	H	sp|O35490|BHMT1_MOUSE	99	95	7.02835e-12	0.000130977	0.000788644	0.00119904
1085	14326	HCD	473.256	0	1.03175	2	R	GFLPPASEK	H	sp|O35490|BHMT1_MOUSE	101	98	7.02835e-12	0.000130977	0.000788644	0.00119904
1086	14019	HCD	473.26	0	9.28575	2	R	GFLPPASEK	H	sp|O35490|BHMT1_MOUSE	75	72	7.02835e-12	0.000130977	0.000788644	0.00119904
1087	10539	HCD	493.779	0	-1.11247	2	R	IEANEALVK	A	sp|Q9D3D9|ATPD_MOUSE	68	68	7.04384e-12	0.000131265	0.000788644	0.00119904
1088	12511	HCD	484.78	0	1.19608	2	R	LGPLVEQGR	Q	sp|P08226|APOE_MOUSE	116	116	7.16418e-12	0.000133508	0.000788644	0.00119904
1089	6442	HCD	540.735	0	-0.225749	2	K	YAYYDTER	I	sp|Q9DCH4|EIF3F_MOUSE	81	77	7.16507e-12	0.000132618	0.000788644	0.00119904
1090	5713	HCD	705.997	0	-1.03743	3	K	TTHFVEGGDAGNREDQINR	L	sp|P14148|RL7_MOUSE	90	40	7.31559e-12	0.000140672	0.000788644	0
1091	11323	HCD	595.352	0	1.84535	3	R	VLTVINQTQKENLRK	F	sp|Q6ZWV7|RL35_MOUSE	105	63	7.31966e-12	0.000139501	0.000788644	0.00119904
1092	10236	HCD	401.24	1	6.06614	3	K	LVSSVSDLPKR	L	sp|P54869|HMCS2_MOUSE	78	66	7.4111e-12	0.000139453	0.000788644	0.00119904
1093	17885	HCD	552.29	1	-13.3419	3	K	C+57.021KVNNKDLPAPIER	T	sp|P01865|GCAM_MOUSE	67	43	7.45681e-12	0.000141732	0.000788644	0
1094	13449	HCD	716.35	1	-1.23484	2	R	TWNDPSVQQDIK	F	sp|P20029|GRP78_MOUSE	87	66	7.70184e-12	0.00014547	0.000788644	0.00119904
1095	21763	HCD	555.28	0	-8.90326	2	K	TDVAAPFGGFK	Q	sp|Q8R0Y6|AL1L1_MOUSE	65	50	7.71231e-12	0.00014512	0.000788644	0.00119904
1096	38178	HCD	553.32	1	8.44813	2	K	ALEWLGFIR	N	sp|P01786|HVM17_MOUSE	52	52	7.73019e-12	0.000144056	0.000788644	0.00119904
1097	7778	HCD	465.909	1	-12.1466	3	R	VVANSKESYELR	Y	sp|P67984|RL22_MOUSE	126	85	7.82175e-12	0.000147735	0.000788644	0
1098	23496	HCD	622.36	1	3.28971	2	K	ADLINNLGTIAK	S	sp|P11499|HS90B_MOUSE	85	75	7.83466e-12	0.000147979	0.000788644	0.00119904
1099	11195	HCD	402.9	0	1.06043	3	K	FKSVDDVIKR	A	sp|P24549|AL1A1_MOUSE	75	67	7.9514e-12	0.000148964	0.000788644	0.00119904
1100	25940	HCD	496.3	1	-8.9229	2	R	LSNIFVIGK	G	sp|P62702|RS4X_MOUSE	102	100	8.27168e-12	0.000154147	0.000788644	0.00119904
1101	16532	HCD	896.93	0	1.49708	2	K	YLDEDTVYHLQPSGR	F	sp|Q91X83|METK1_MOUSE	87	50	8.29489e-12	0.000158087	0.000788644	0
1102	29481	HCD	833.99	0	-0.65866	2	R	QAQIEVVPSASALIIK	A	sp|P35979|RL12_MOUSE	89	51	8.31519e-12	0.000158866	0.000788644	0.00119904
1103	11326	HCD	615.56	0	1.88393	4	K	TDSFSC+57.021NVRHEGLKNYYLKK	T	sp|P01867|IGG2B_MOUSE	123	59	8.45451e-12	0.000162884	0.000788644	0.00119904
1104	5673	HCD	547.259	1	-11.4559	3	K	NNIHC+57.021NTIAPNAGSR	M	sp|P51660|DHB4_MOUSE	85	47	8.49163e-12	0.000161836	0.000788644	0
1105	18114	HCD	487.295	0	0.125253	2	K	LVPVGYGIR	K	sp|P57776|EF1D_MOUSE	88	88	8.92523e-12	0.000166326	0.000788644	0.00119904
1106	21245	HCD	609.31	0	-14.7249	2	K	DAGTIAGLNVMR	I	sp|P20029|GRP78_MOUSE	99	70	8.96577e-12	0.000169343	0.000788644	0.00119904
1107	17676	HCD	473.3	0	16.8291	2	K	LVPVGYGIK	K	sp|O70251|EF1B_MOUSE	82	82	8.9674e-12	0.000167112	0.000788644	0.00119904
1108	11691	HCD	468.74	0	4.36209	2	R	AHGFTFTR	G	sp|P35486|ODPA_MOUSE	68	64	9.06585e-12	0.000167799	0.000788644	0.00119904
1109	14784	HCD	451.27	0	-2.84028	2	K	LSDGVAVLK	V	sp|P63038|CH60_MOUSE	106	106	9.09235e-12	0.00016944	0.000788644	0.00119904
1110	31019	HCD	813.45	1	-0.711954	2	R	TGAIVDVPVGEELLGR	V	sp|Q03265|ATPA_MOUSE	99	66	9.44086e-12	0.000180373	0.000788644	0
1111	18821	HCD	599.837	0	0	2	K	ASGPPVSELITK	A	sp|P43277|H13_MOUSE	72	60	9.50704e-12	0.000179567	0.000788644	0.00119904
1112	9492	HCD	478.709	0	3.63375	2	R	FGSGMNMGR	I	sp|Q9D0E1|HNRPM_MOUSE	53	52	9.54886e-12	0.000177948	0.000788644	0.00119904
1113	30520	HCD	879.96	1	-0.449909	2	R	VC+57.021TLAIIDPGDSDIIR	S	sp|P62889|RL30_MOUSE	65	34	9.55246e-12	0.000182505	0.000788644	0.00119904
1114	36244	HCD	547.865	0	3.11937	2	K	LLEPVLLLGK	E	sp|P14131|RS16_MOUSE	76	75	9.57802e-12	0.000179438	0.000788644	0.00119904
1115	16637	HCD	549.287	0	1.22229	2	K	NTLYLQMSK	V	sp|P01808|HVM38_MOUSE	89	81	9.64251e-12	0.000179693	0.000788644	0.00119904
1116	11337	HCD	757.37	0	2.98178	2	R	YLQEIYNSNNQK	I	sp|Q8VCM7|FIBG_MOUSE	71	53	9.71316e-12	0.00018346	0.000788644	0
1117	24164	HCD	991.5	0	-2.58545	2	K	TVTNAVVTVPAYFNDSQR	Q	sp|P63017|HSP7C_MOUSE	175	85	9.7162e-12	0.000186457	0.000788644	0
1118	13156	HCD	824.41	1	2.3348	2	R	ALEEAMEQKAELER	L	sp|Q8VDD5|MYH9_MOUSE	62	43	9.77395e-12	0.000185775	0.000788644	0
1119	17815	HCD	508.6	0	-2.0401	3	R	LLRDYQELMNTK	L	sp|Q3TTY5|K22E_MOUSE	115	77	9.86249e-12	0.00018628	0.000788644	0.00119904
1120	17754	HCD	496.77	0	-8.41611	2	R	ANTFVAELK	G	sp|P08249|MDHM_MOUSE	87	82	9.93208e-12	0.000185089	0.000788644	0.00119904
1121	23241	HCD	835.41	0	3.5069	2	K	LSIEYDSEPFGKER	D	sp|P97784|CRY1_MOUSE	95	61	1.01003e-11	0.000191978	0.000788644	0
1122	7031	HCD	710.345	0	-2.92138	2	K	VITNANENYEPR	N	sp|P14106|C1QB_MOUSE	87	53	1.02307e-11	0.000193235	0.000788644	0.00119904
1123	10678	HCD	508.3	0	3.7224	2	K	ITQSNAILR	Y	sp|P10649|GSTM1_MOUSE	105	105	1.02416e-11	0.000190857	0.000788644	0.00119904
1124	10876	HCD	508.3	0	2.58166	2	K	ITQSNAILR	Y	sp|P10649|GSTM1_MOUSE	113	113	1.02416e-11	0.000190857	0.000788644	0.00119904
1125	14316	HCD	469.9	0	1.16901	3	K	VYNYNHLMPTR	Y	sp|P61358|RL27_MOUSE	78	55	1.02451e-11	0.000192779	0.000788644	0
1126	13277	HCD	678.361	1	-15.4402	2	R	ALGQNPTNAEVLK	V	sp|Q60605|MYL6_MOUSE	111	73	1.0393e-11	0.000196955	0.000788644	0
1127	16993	HCD	496.9	1	-12.9249	3	R	TTPSYVAFTDTER	L	sp|P17879|HS71B_MOUSE	80	51	1.04758e-11	0.000198525	0.000788644	0
1128	17576	HCD	575.32	0	0.318267	3	K	SVTGQTVLITGAGHGIGR	L	sp|Q8VCR2|DHB13_MOUSE	101	50	1.04964e-11	0.000201429	0.000788644	0.00119904
1129	14973	HCD	651.82	0	0	2	R	FSGSGSGTQFSLK	I	sp|P01636|KV5A4_MOUSE	114	84	1.05568e-11	0.000200059	0.000788644	0
1130	16538	HCD	687.9	0	-1.68581	2	K	TLLKDTTVTGLGR	G	sp|Q8BMS1|ECHA_MOUSE	115	72	1.06365e-11	0.000201571	0.000788644	0
1131	8134	HCD	571.784	0	-2.1349	2	R	NQPMTPEAVR	D	sp|P51660|DHB4_MOUSE	72	60	1.07372e-11	0.000201154	0.000788644	0.00119904
1132	32126	HCD	735.76	1	3.34835	3	K	GLVRAPQVYILPPPAEQLSR	K	sp|P01867|IGG2B_MOUSE	101	49	1.07919e-11	0.000207917	0.000788644	0.00119904
1133	11624	HCD	785.383	1	-10.2245	2	R	QAVTNPNNTFYATK	R	sp|P38647|GRP75_MOUSE	100	58	1.08183e-11	0.000205626	0.000788644	0.00119904
1134	16750	HCD	665.38	0	16.8786	3	-	EVQLQQSGPELVKPGASVK	M	sp|P01756|HVM12_MOUSE	116	60	1.09419e-11	0.000210403	0.000788644	0
1135	18474	HCD	552.29	1	-13.3419	3	K	C+57.021KVNNKDLPAPIER	T	sp|P01865|GCAM_MOUSE	61	41	1.10266e-11	0.000209584	0.000788644	0
1136	19612	HCD	617.32	0	-2.76839	2	R	DLYLENPEIK	I	sp|P21981|TGM2_MOUSE	82	79	1.11988e-11	0.000209802	0.000788644	0.00119904
1137	15118	HCD	733.38	0	-0.416122	2	K	VITEYLNAQESAK	S	sp|Q78PY7|SND1_MOUSE	80	60	1.13098e-11	0.00021433	0.000788644	0.00119904
1138	12655	HCD	403.46	0	5.37045	4	R	TIEKFEKEAAEMGK	G	sp|P10126|EF1A1_MOUSE	65	40	1.13929e-11	0.000216546	0.000788644	0
1139	4990	HCD	793.06	0	5.4643	3	R	EVKPEEVTC+57.021SEHC+57.021LQKYLK	M	sp|Q9WV98|TIM9_MOUSE	29	4	1.15501e-11	0.000222099	0.000788644	0.00119904
1140	10300	HCD	510.582	0	-1.67356	3	K	IGGHGAEYGAEALER	M	sp|P01942|HBA_MOUSE	125	86	1.17254e-11	0.000223466	0.000788644	0
1141	8222	HCD	495.753	0	-2.21609	2	K	WKIDGSER	Q	sp|P01837|IGKC_MOUSE	113	113	1.18839e-11	0.000219959	0.000788644	0.00119904
1142	14405	HCD	405.225	0	0.753103	3	-	GVNAVHWFRK	G	sp|P97784|CRY1_MOUSE	113	93	1.19338e-11	0.000223572	0.000788644	0
1143	26225	HCD	570.84	1	-7.75673	2	K	TGVAPIIDVVR	S	sp|P14115|RL27A_MOUSE	90	76	1.19564e-11	0.00022498	0.000788644	0.00119904
1144	27668	HCD	928.47	1	3.2569	2	K	FEDGDLTLYQSNAILR	H	sp|P46425|GSTP2_MOUSE	103	61	1.20644e-11	0.000230497	0.000788644	0
1145	4651	HCD	546.932	0	3.23628	3	K	NNIHC+57.021NTIAPNAGSR	M	sp|P51660|DHB4_MOUSE	67	38	1.20712e-11	0.000230057	0.000788644	0
1146	8009	HCD	412.904	0	0.960827	3	R	VSQEHPVVLTK	F	sp|Q8C196|CPSM_MOUSE	88	65	1.20724e-11	0.000227162	0.000788644	0.00119904
1147	16936	HCD	426.576	0	2.57547	3	K	FKLITEDVQGK	N	sp|P97351|RS3A_MOUSE	69	59	1.21553e-11	0.000228723	0.000788644	0.00119904
1148	11570	HCD	423.91	1	7.03835	3	K	ILEVHVDKGMK	H	sp|Q9QYJ0|DNJA2_MOUSE	94	83	1.21975e-11	0.000229517	0.000788644	0.00119904
1149	8535	HCD	504.491	0	0.96787	4	K	TGVHHYSGNNIELGTAC+57.021GK	Y	sp|P62889|RL30_MOUSE	84	44	1.24544e-11	0.000239488	0.000788644	0.00119904
1150	7761	HCD	521.607	0	2.69132	3	R	LKEDTQVADVTTSR	C	sp|P19096|FAS_MOUSE	61	38	1.25161e-11	0.000237895	0.000788644	0.00119904
1151	13469	HCD	572.768	0	-0.852493	2	K	SSSATYMELR	S	sp|P06330|HVM51_MOUSE	122	92	1.28739e-11	0.000241184	0.000788644	0
1152	15358	HCD	474.8	0	5.33482	2	R	FNVLKVTK	A	sp|P62281|RS11_MOUSE	73	73	1.32087e-11	0.00024448	0.000788644	0.00119904
1153	23433	HCD	1013.04	0	3.73548	2	R	AIAEELAPERGFLPPASEK	H	sp|O35490|BHMT1_MOUSE	111	62	1.32744e-11	0.000255254	0.000788644	0.00119904
1154	9530	HCD	514.28	1	9.09008	2	K	VAVC+57.021DIPPR	G	sp|A2AQ07|TBB1_MOUSE	42	41	1.33893e-11	0.000249515	0.000788644	0.00119904
1155	9209	HCD	514.771	0	15.1769	2	K	TAVC+57.021DIPPR	G	sp|Q9CWF2|TBB2B_MOUSE	83	76	1.36227e-11	0.000253866	0.000788644	0
1156	21884	HCD	690.363	1	0.222711	2	R	C+57.021LYASVLTAQPR	L	sp|P58252|EF2_MOUSE	94	56	1.36729e-11	0.00025825	0.000788644	0.00119904
1157	20815	HCD	743.38	0	-1.14947	2	K	GVVDSDDLPLNVSR	E	sp|P08113|ENPL_MOUSE	104	65	1.37729e-11	0.000261783	0.000788644	0.00119904
1158	12360	HCD	408.56	1	-4.65809	3	K	VYINLDKETK	T	sp|P52503|NDUS6_MOUSE	78	64	1.41912e-11	0.000265863	0.000788644	0.00119904
1159	12300	HCD	532.81	0	3.2075	2	R	LASYLDKVR	A	sp|Q9QWL7|K1C17_MOUSE	47	41	1.42443e-11	0.00026545	0.000788644	0
1160	24655	HCD	636.364	0	1.05504	3	R	APQVYILPPPAEQLSRK	D	sp|P01867|IGG2B_MOUSE	106	64	1.4891e-11	0.000285152	0.000788644	0.00119904
1161	20506	HCD	515.301	0	1.06601	2	R	VLDELTLAR	A	sp|Q9QWL7|K1C17_MOUSE	144	144	1.49024e-11	0.000277713	0.000788644	0.00119904
1162	21065	HCD	776.39	0	5.03132	2	R	GLEVTAYSPLGSSDR	A	sp|Q9JII6|AK1A1_MOUSE	87	55	1.49406e-11	0.000284743	0.000788644	0.00119904
1163	16900	HCD	694.39	1	2.33249	2	R	VC+57.021EEIAIIPSKK	L	sp|P63276|RS17_MOUSE	59	42	1.50068e-11	0.000283446	0.000788644	0
1164	4560	HCD	431.521	0	-0.141442	3	K	WC+57.021HDNGVNYK	I	sp|P11276|FINC_MOUSE	62	50	1.57694e-11	0.00029543	0.000788644	0.00119904
1165	14803	HCD	471.75	0	-0.388141	2	R	LTAYEFAK	Q	sp|Q8VCR2|DHB13_MOUSE	100	100	1.61211e-11	0.000298385	0.000788644	0.00119904
1166	7305	HCD	611.29	1	-3.06248	3	R	QLEEAEEEAQRANASR	R	sp|Q8VDD5|MYH9_MOUSE	102	65	1.63824e-11	0.000312995	0.000788644	0
1167	7597	HCD	674.796	0	0.723599	2	R	SEDTALYYC+57.021AR	L	sp|P01808|HVM38_MOUSE	73	51	1.67843e-11	0.000315824	0.000788644	0
1168	11391	HCD	487.28	1	2.19642	2	K	ILQDIASGR	H	sp|Q91VD9|NDUS1_MOUSE	84	84	1.69091e-11	0.00031511	0.000788644	0.00119904
1169	19496	HCD	897.4	1	2.96142	2	R	EAAQMDMVNDGVEDLR	G	sp|P19157|GSTP1_MOUSE	62	27	1.70962e-11	0.000326633	0.000788644	0.00119904
1170	22844	HCD	684.37	0	0.624291	2	R	TDGKVFQFLNAK	C	sp|Q8BP67|RL24_MOUSE	58	36	1.70988e-11	0.000322958	0.000788644	0.00119904
1171	21455	HCD	624.99	0	9.76588	3	K	ATLTVDKSSSATYMELR	S	sp|P06330|HVM51_MOUSE	96	54	1.71618e-11	0.000328636	0.000788644	0
1172	36134	HCD	804.4	1	4.04236	4	R	ELLTTMGDRFTDEEVDELYREAPIDKK	G	sp|Q3THE2|ML12B_MOUSE	165	51	1.72523e-11	0.000336216	0.000788644	0.00119904
1173	3945	HCD	508.599	0	-0.0600033	3	K	IQDKEGIPPDQQR	L	sp|P62984|RL40_MOUSE	71	46	1.79505e-11	0.000340176	0.000788644	0.00119904
1174	9614	HCD	416.72	0	1.90406	2	R	FGVPAEGR	S	sp|Q9JK92|HSPB8_MOUSE	78	78	1.80547e-11	0.000334173	0.000788644	0.00119904
1175	23345	HCD	834.4	0	-1.09723	2	R	NVQAEEMVEFSSGLK	G	sp|Q03265|ATPA_MOUSE	55	24	1.85059e-11	0.000352691	0.000788644	0.00119904
1176	23218	HCD	1013.04	0	3.73548	2	R	AIAEELAPERGFLPPASEK	H	sp|O35490|BHMT1_MOUSE	114	60	1.85092e-11	0.000355916	0.000788644	0.00119904
1177	19504	HCD	896.89	0	-6.3288	2	R	EAAQMDMVNDGVEDLR	G	sp|P19157|GSTP1_MOUSE	59	31	1.858e-11	0.000354982	0.000788644	0.00119904
1178	12462	HCD	437.255	0	-0.558348	2	K	ASIAALEAK	I	sp|Q8VDD5|MYH9_MOUSE	92	92	1.87325e-11	0.000349089	0.000788644	0.00119904
1179	12369	HCD	442.91	0	-3.30731	3	K	TAVC+57.021DIPPRGLK	M	sp|Q9CWF2|TBB2B_MOUSE	87	67	1.89857e-11	0.000358597	0.000788644	0.00119904
1180	7993	HCD	671.804	1	-15.5911	2	R	ASNGDAWVEAHGK	L	sp|P38647|GRP75_MOUSE	47	27	1.89926e-11	0.000359924	0.000788644	0
1183	7717	HCD	545.769	0	-0.223667	2	R	VTMQNLNDR	L	sp|P02535|K1C10_MOUSE	70	67	1.95432e-11	0.000364196	0.000788644	0
1184	8960	HCD	459.25	0	-1.19611	2	K	LGVTADDVK	N	sp|P14152|MDHC_MOUSE	53	49	1.96051e-11	0.00036535	0.000788644	0.00119904
1185	16522	HCD	897.43	1	-0.373097	2	K	YLDEDTVYHLQPSGR	F	sp|Q91X83|METK1_MOUSE	99	47	1.96288e-11	0.000374093	0.000788644	0
1186	32878	HCD	712.73	1	5.34148	3	K	ALPGHLKPFETLLSQNQGGK	A	sp|P46425|GSTP2_MOUSE	82	41	1.98462e-11	0.000382357	0.000788644	0
1187	7399	HCD	647.34	0	-5.37428	2	R	GNYVAEKISGQK	V	sp|O35490|BHMT1_MOUSE	75	56	2.00429e-11	0.000378565	0.000788644	0
1188	11596	HCD	633.82	1	-9.39467	2	R	KESYSVYVYK	V	sp|Q64475|H2B1B_MOUSE	42	32	2.01138e-11	0.000376818	0.000788644	0.00119904
1189	12088	HCD	488.6	1	-5.45704	3	R	FLEQQNKVLDTK	W	sp|P50446|K2C6A_MOUSE	84	59	2.03916e-11	0.000385151	0.000788644	0.00119904
1190	9837	HCD	787.414	0	1.62778	2	R	ALLAGKDSETGENIR	Q	sp|P38647|GRP75_MOUSE	71	41	2.05526e-11	0.0003917	0.000788644	0
1191	13219	HCD	478.718	0	-0.764982	2	R	MPEFYNR	F	sp|P16460|ASSY_MOUSE	96	96	2.07026e-11	0.000378811	0.000788644	0.00119904
1192	13594	HCD	627.32	1	-10.0763	2	K	YQAVTATLEEK	R	sp|P19253|RL13A_MOUSE	94	66	2.07326e-11	0.000390118	0.000788644	0
1193	12828	HCD	440.73	0	0.553946	2	K	TALDTFGR	I	sp|P51660|DHB4_MOUSE	121	121	2.08863e-11	0.000386583	0.000788644	0.00119904
1194	11234	HCD	784.89	0	1.47749	2	R	QAVTNPNNTFYATK	R	sp|P38647|GRP75_MOUSE	86	49	2.09395e-11	0.000397999	0.000788644	0.00119904
1195	9158	HCD	705.354	0	-0.432656	2	R	FSTSQSLPASQTR	L	sp|P28665|MUG1_MOUSE	89	52	2.11124e-11	0.000400096	0.000788644	0.00119904
1196	31802	HCD	635.66	0	-12.8663	3	R	MNANSLLASPTGLSPYLR	F	sp|P97784|CRY1_MOUSE	73	28	2.19359e-11	0.000420957	0.000788644	0
1197	19594	HCD	496.794	0	2.45717	2	K	AILNYIASK	Y	sp|P30115|GSTA3_MOUSE	71	70	2.21326e-11	0.000412452	0.000788644	0.00119904
1198	22698	HCD	701.36	0	-2.00155	2	K	GNDVLVIEC+57.021NLR	A	sp|Q8C196|CPSM_MOUSE	103	81	2.22128e-11	0.00041955	0.000788644	0.00119904
1199	16638	HCD	775.41	1	-2.00713	2	R	MQKEITALAPSTMK	I	sp|P60710|ACTB_MOUSE	114	69	2.22238e-11	0.000422411	0.000788644	0
1200	9246	HCD	492.23	0	-11.9036	3	K	LHYC+57.021VSC+57.021AIHSK	V	sp|P62855|RS26_MOUSE	63	37	2.22322e-11	0.000419916	0.000788644	0.00119904
1201	15030	HCD	458.914	1	-13.929	3	R	KAWVANFERPR	M	sp|P97784|CRY1_MOUSE	110	74	2.22996e-11	0.000419605	0.000788644	0
1202	9678	HCD	483.55	1	-9.36648	3	K	DRC+57.021FATQVYC+57.021K	W	sp|P25688|URIC_MOUSE	56	41	2.23538e-11	0.000420624	0.000788644	0.00119904
1203	17422	HCD	910.95	1	-8.07693	2	K	IVSNASC+57.021TTNC+57.021LAPLAK	V	sp|P16858|G3P_MOUSE	47	14	2.24021e-11	0.000428985	0.000788644	0
1204	14866	HCD	861.928	0	0.141625	2	R	VFDKEGNGTVMGAEIR	H	sp|Q60605|MYL6_MOUSE	90	48	2.29762e-11	0.000438974	0.000788644	0
1205	14866	HCD	861.928	0	0.141625	2	R	VFDKEGNGTVMGAELR	H	sp|P09542|MYL3_MOUSE	90	48	2.29762e-11	0.000438974	0.000788644	0
1206	30486	HCD	974.49	1	12.5029	2	K	MEPLEMPADTITSDVIGK	C	sp|P97784|CRY1_MOUSE	97	43	2.30736e-11	0.000442791	0.000788644	0
1207	17308	HCD	839.9	1	-11.0146	2	K	NQLTSNPENTVFDAK	R	sp|P20029|GRP78_MOUSE	72	29	2.30985e-11	0.000440219	0.000788644	0
1208	12498	HCD	584.288	0	-0.313382	3	K	TAPFDSRFPNQNQTK	N	sp|P56391|CX6B1_MOUSE	99	57	2.3123e-11	0.000440685	0.000788644	0
1209	3694	HCD	508.6	0	2.76015	3	K	IQDKEGIPPDQQR	L	sp|P62984|RL40_MOUSE	52	37	2.31379e-11	0.00043848	0.000788644	0.00119904
1210	16806	HCD	508.289	0	2.4016	2	K	IGVPAFQQR	L	sp|Q64339|ISG15_MOUSE	82	77	2.35362e-11	0.000438609	0.000788644	0.00119904
1211	13908	HCD	822.39	0	-8.75751	2	K	NVTELNEPLSNEER	N	sp|P61982|1433G_MOUSE	113	67	2.38558e-11	0.00045343	0.000788644	0.00119904
1212	7258	HCD	509.763	0	1.49666	2	R	SLQSVAEER	A	sp|Q9CZM2|RL15_MOUSE	96	94	2.40478e-11	0.000448143	0.000788644	0.00119904
1213	14165	HCD	684.68	1	-5.76641	3	R	LHDNPALKEC+57.021IQGADTIR	C	sp|P97784|CRY1_MOUSE	155	66	2.44408e-11	0.000469029	0.000788644	0
1214	12574	HCD	422.894	0	-0.432981	3	R	TKYETELNLR	M	sp|Q6IFX2|K1C42_MOUSE	92	76	2.45933e-11	0.000460739	0.000788644	0.00119904
1215	14297	HCD	858.46	0	3.05724	2	-	PGVTVKDVNQQEFVR	A	sp|Q9CZX8|RS19_MOUSE	97	46	2.54285e-11	0.000484625	0.000788644	0.00119904
1216	11109	HCD	638.812	0	-0.668813	2	R	LAQEDPDYGLR	D	sp|P24270|CATA_MOUSE	92	68	2.57528e-11	0.000484582	0.000788644	0.00119904
1217	18736	HCD	487.8	1	-3.56752	2	K	LSEIVTLAK	E	sp|Q9Z2I9|SUCB1_MOUSE	89	89	2.59654e-11	0.000483878	0.000788644	0.00119904
1218	18761	HCD	487.3	0	-0.125252	2	K	LSEIVTLAK	E	sp|Q9Z2I9|SUCB1_MOUSE	82	82	2.59654e-11	0.000483878	0.000788644	0.00119904
1219	10457	HCD	416.567	0	0	3	K	GLSQSALPYRR	S	sp|P62301|RS13_MOUSE	139	110	2.59989e-11	0.000489214	0.000788644	0.00119904
1220	9914	HCD	627.8	1	-0.655664	4	R	HQGVMVGMGQKDSYVGDEAQSKR	G	sp|P60710|ACTB_MOUSE	91	25	2.64052e-11	0.000511399	0.000788644	0
1221	12008	HCD	432.564	1	-14.9193	3	R	MKQIYQQLSR	Y	sp|P97784|CRY1_MOUSE	111	91	2.65323e-11	0.000497065	0.000788644	0
1222	30969	HCD	920.49	0	-18.9635	2	R	KKYQRTNQELEKFK	D	sp|Q9WVM1|RGAP1_MOUSE	91	49	2.67275e-11	0.000508013	0.000788644	0.00119904
1223	10068	HCD	507.239	0	1.14312	2	K	DGPGFYTTR	C	sp|Q8BMS1|ECHA_MOUSE	62	58	2.74394e-11	0.000511346	0.000788644	0.00119904
1224	14194	HCD	614.28	0	5.26613	2	R	EVC+57.021GFAPYER	R	sp|P47964|RL36_MOUSE	85	54	2.77631e-11	0.000520123	0.000788644	0.00119904
1225	14541	HCD	494.25	1	-17.1802	2	R	GQPADVFPR	L	sp|P97784|CRY1_MOUSE	131	115	2.784e-11	0.000518812	0.000788644	0
1226	16654	HCD	682.384	0	1.34166	2	K	ITVTSEVPFSKR	Y	sp|P67984|RL22_MOUSE	83	55	2.8356e-11	0.000535581	0.000788644	0
1227	14756	HCD	899.48	0	-2.3071	2	K	APQVYTIPPPKEQMAK	D	sp|P01869|IGH1M_MOUSE	113	45	2.83593e-11	0.00054182	0.000788644	0
1228	14968	HCD	451.272	0	1.35252	2	K	LSDGVAVLK	V	sp|P63038|CH60_MOUSE	106	105	2.88048e-11	0.000536791	0.000788644	0.00119904
1229	15323	HCD	552.982	1	-10.1224	3	R	VLTVINQTQKENLR	K	sp|Q6ZWV7|RL35_MOUSE	130	79	2.89051e-11	0.000549403	0.000788644	0
1230	7523	HCD	559.305	0	-0.109127	2	K	LMKEGLEAAR	L	sp|O35490|BHMT1_MOUSE	64	59	2.94332e-11	0.000551411	0.000788644	0.00119904
1231	9112	HCD	483.007	0	0.631826	4	K	AKQTLENERGELANEVK	A	sp|Q8VDD5|MYH9_MOUSE	104	63	2.95294e-11	0.000565469	0.000788644	0.00119904
1232	5700	HCD	463.248	0	-0.52702	3	R	DAASVLKQDRER	L	sp|O35973|PER1_MOUSE	106	84	2.95571e-11	0.000558267	0.000788644	0.00119904
1233	16153	HCD	522.317	0	2.80452	2	K	KLVWVPSSK	N	sp|Q8VDD5|MYH9_MOUSE	59	48	3.00363e-11	0.000559741	0.000788644	0.00119904
1234	7178	HCD	624.29	0	-1.85758	2	R	AGELTEDEVER	V	sp|P62270|RS18_MOUSE	83	72	3.00905e-11	0.000566205	0.000788644	0.00119904
1235	12503	HCD	482.285	0	0.696048	2	R	EAVTFLRK	I	sp|Q9D2G2|ODO2_MOUSE	91	91	3.0292e-11	0.000560673	0.000788644	0.00119904
1236	10905	HCD	429.24	0	15.1438	3	R	LQRLEDELNR	A	sp|E9Q557|DESP_MOUSE	117	87	3.03123e-11	0.000567881	0.000788644	0.00119904
1237	6695	HCD	497.26	0	3.31407	3	K	SGDGLSGTQKEAALR	A	sp|Q5YD48|A1CF_MOUSE	64	44	3.04878e-11	0.000581047	0.000788644	0.00119904
1238	11235	HCD	718.39	0	-0.84961	3	R	RAPAAQPPAAAAPSAVGSPAAAPR	Q	sp|Q9D1L0|CHCH2_MOUSE	107	45	3.14472e-11	0.000610038	0.000788644	0.00119904
1239	13798	HCD	469.75	0	-1.49421	2	K	TTDGYLLR	L	sp|P97351|RS3A_MOUSE	70	70	3.15251e-11	0.000583496	0.000788644	0.00119904
1240	9050	HCD	621.345	0	-1.66992	2	K	VNTLIRPDGEK	K	sp|P62751|RL23A_MOUSE	77	62	3.16992e-11	0.000596475	0.000788644	0.00119904
1241	22518	HCD	645.346	0	0.662042	2	R	SGPFAPVLSATSR	G	sp|Q9CR68|UCRI_MOUSE	116	87	3.17954e-11	0.000602547	0.000788644	0.00119904
1242	18336	HCD	741.9	1	-11.8943	2	K	SQIHDIVLVGGSTR	I	sp|P63017|HSP7C_MOUSE	87	62	3.18424e-11	0.000605232	0.000788644	0
1243	16227	HCD	739.38	1	-13.5043	2	R	FLEQQNQVLETK	W	sp|Q6IME9|K2C72_MOUSE	119	76	3.20188e-11	0.000604762	0.000788644	0
1244	2190	HCD	615.805	0	0.396458	4	R	SSAGTGLSSGKRPSQEEDAQSVGPK	V	sp|P97784|CRY1_MOUSE	95	32	3.20883e-11	0.000623457	0.000788644	0
1245	9548	HCD	504.61	1	2.34141	3	R	TANLGAGAAQPLRDR	A	sp|P08226|APOE_MOUSE	124	69	3.25282e-11	0.000619933	0.000788644	0
1246	15159	HCD	573.291	0	0.745253	4	R	IASGRPYNPSMSRPDAWGVTK	G	sp|O35490|BHMT1_MOUSE	146	64	3.26527e-11	0.000630231	0.000788644	0.00119904
1247	9916	HCD	674.796	0	0.814049	2	R	AEDTGIYYC+57.021TR	P	sp|P01804|HVM35_MOUSE	73	49	3.26729e-11	0.000614797	0.000788644	0.00119904
1248	15160	HCD	494.79	0	5.48936	2	R	ISSLLQEAK	T	sp|Q91XD4|FTCD_MOUSE	93	93	3.27684e-11	0.000610655	0.000788644	0.00119904
1249	8547	HCD	402.563	0	0.303233	3	R	KGHAVGDIPGVR	F	sp|P62267|RS23_MOUSE	74	63	3.43942e-11	0.00064963	0.000788644	0.00119904
1250	10869	HCD	827.93	1	-14.9359	2	K	C+57.021KVNNKDLPAPIER	T	sp|P01865|GCAM_MOUSE	82	35	3.48615e-11	0.000662617	0.000788644	0
1251	15431	HCD	469.26	1	6.12196	2	K	LYDIDVAK	V	sp|P62751|RL23A_MOUSE	94	94	3.51713e-11	0.000650984	0.000788644	0.00119904
1252	11764	HCD	646.31	1	-15.4505	2	R	IC+57.021NQVLVC+57.021ER	K	sp|Q9Z2I9|SUCB1_MOUSE	35	27	3.59902e-11	0.000674253	0.000788644	0.00119904
1253	13360	HCD	448.771	0	-0.27201	2	R	LAFIAHPK	L	sp|P47915|RL29_MOUSE	86	86	3.60722e-11	0.000667657	0.000788644	0.00119904
1254	13556	HCD	448.771	0	-1.02004	2	R	LAFIAHPK	L	sp|P47915|RL29_MOUSE	75	75	3.60722e-11	0.000667657	0.000788644	0.00119904
1255	22015	HCD	599.31	1	-18.0901	2	R	LVQAFQFTDK	H	sp|P35700|PRDX1_MOUSE	53	41	3.63834e-11	0.000681619	0.000788644	0
1256	10182	HCD	514.626	0	-0.948807	3	R	LIDKEVISPDTRR	F	sp|Q9DCN2|NB5R3_MOUSE	83	57	3.64338e-11	0.000690448	0.000788644	0.00119904
1257	15384	HCD	464.945	0	0.656369	3	R	TIVITSHPGQIVK	H	sp|P63037|DNJA1_MOUSE	100	75	3.68062e-11	0.000697505	0.000788644	0.00119904
1258	3375	HCD	459.49	0	-5.37968	4	R	KAVVVC+57.021PKDEDYKQR	T	sp|Q8VEK3|HNRPU_MOUSE	57	29	3.7375e-11	0.000712306	0.000788644	0.00119904
1259	38809	HCD	1127.68	0	-11.366	2	R	RAKRRKRKKEVPFWGRR	M	sp|Q9QXU7|PROK2_MOUSE	39	14	3.77073e-11	0.000722069	0.000788644	0.00119904
1260	12728	HCD	492.23	0	2.54195	2	R	NDLMEYAK	Q	sp|P16460|ASSY_MOUSE	67	64	3.78054e-11	0.000699738	0.000788644	0.00119904
1261	9064	HCD	788.86	1	-3.36645	2	R	NTQINNSWGQEER	S	sp|O08573|LEG9_MOUSE	63	32	3.78565e-11	0.000717409	0.000788644	0.00119904
1262	12428	HCD	728.35	0	2.09498	2	R	DLTTAGAVTQC+57.021YR	D	sp|P62717|RL18A_MOUSE	79	45	3.8295e-11	0.00072572	0.000788644	0.00119904
1263	11127	HCD	827.93	1	-14.9359	2	K	C+57.021KVNNKDLPAPIER	T	sp|P01865|GCAM_MOUSE	58	32	3.8313e-11	0.000728221	0.000788644	0
1264	30236	HCD	492.63	0	-18.6461	3	R	RQLFRTKSKRR	F	sp|Q80UW5|MRCKG_MOUSE	29	14	3.84185e-11	0.000722909	0.000788644	0.00119904
1265	21809	HCD	660.38	0	-3.23484	2	K	YLATSQVLLSPK	S	sp|P01872|IGHM_MOUSE	64	38	3.9247e-11	0.000741288	0.000788644	0
1266	10922	HCD	406.881	0	-2.85013	3	R	SVDEGLLDSKR	V	sp|A2AS89|SPEB_MOUSE	116	87	3.96341e-11	0.000745782	0.000788644	0.00119904
1267	13576	HCD	446.761	0	1.50279	2	K	LTITYGPK	V	sp|P12710|FABPL_MOUSE	104	104	4.03228e-11	0.000746333	0.000788644	0.00119904
1268	10145	HCD	553.283	0	-4.41256	2	K	GGNNLVSGYPK	R	sp|Q91X72|HEMO_MOUSE	76	57	4.04029e-11	0.00076025	0.000788644	0.00119904
1269	9972	HCD	462.596	0	-1.18746	3	K	LIEVDDERKLR	T	sp|P62754|RS6_MOUSE	99	76	4.04223e-11	0.000760614	0.000788644	0.00119904
1271	8631	HCD	816.413	0	0.672842	2	K	ISGQKVNEAAC+57.021DIAR	Q	sp|O35490|BHMT1_MOUSE	79	49	4.0958e-11	0.000780592	0.00150489	0
1272	4397	HCD	508.597	0	-2.64014	3	K	IQDKEGIPPDQQR	L	sp|P62984|RL40_MOUSE	59	40	4.12637e-11	0.000781977	0.00150489	0.00119904
1273	20888	HCD	625.32	1	2.67046	3	K	ATLTVDKSSSATYMELR	S	sp|P06330|HVM51_MOUSE	79	43	4.19159e-11	0.000802662	0.00150489	0
1274	16120	HCD	530.793	1	-17.3199	2	R	AAYQVAALPR	G	sp|P52760|UK114_MOUSE	86	66	4.22968e-11	0.000792402	0.00150489	0
1275	9783	HCD	498.26	0	8.39109	2	K	YALTGDEVK	K	sp|P62702|RS4X_MOUSE	77	70	4.23431e-11	0.000789085	0.00150489	0.00229358
1276	8985	HCD	514.76	0	-6.40275	2	K	TAVC+57.021DIPPR	G	sp|Q9CWF2|TBB2B_MOUSE	54	46	4.27993e-11	0.000797585	0.00150489	0
1277	9797	HCD	439.74	0	-0.346996	2	R	SSPIYVGR	V	sp|P21981|TGM2_MOUSE	78	78	4.28523e-11	0.000793149	0.00150489	0.00229358
1278	30899	HCD	614.35	1	13.2551	3	R	KKYQRTNQELEKFK	D	sp|Q9WVM1|RGAP1_MOUSE	84	52	4.28982e-11	0.000815372	0.00150489	0.00119904
1279	16799	HCD	509.274	0	0.47939	2	K	VLEGMDVVR	K	sp|P24369|PPIB_MOUSE	88	83	4.32784e-11	0.000806514	0.00150489	0.00229358
1280	14214	HCD	769.89	0	1.98195	2	R	ITEIYEGTSEIQR	L	sp|Q07417|ACADS_MOUSE	82	60	4.33077e-11	0.000820713	0.00150489	0.00229358
1281	19481	HCD	512.27	1	-4.41067	2	R	QQLEVFMK	K	sp|O35490|BHMT1_MOUSE	56	56	4.35315e-11	0.000805722	0.00150489	0.00229358
1282	11972	HCD	447.72	0	0.340811	2	K	ADEGISFR	G	sp|P35700|PRDX1_MOUSE	87	87	4.39005e-11	0.000812551	0.00150489	0.00229358
1283	9280	HCD	503.575	0	-2.30287	3	K	AHYGGFTVQNEASK	Y	sp|Q8K0E8|FIBB_MOUSE	55	37	4.42909e-11	0.000841843	0.00150489	0.00229358
1284	15360	HCD	697.41	1	-8.3623	2	R	TIVITSHPGQIVK	H	sp|P63037|DNJA1_MOUSE	78	50	4.43425e-11	0.000840324	0.00150489	0.00119904
1285	17627	HCD	508.94	1	8.86182	3	R	LLRDYQELMNTK	L	sp|Q3TTY5|K22E_MOUSE	91	51	4.43813e-11	0.000838263	0.00150489	0.00119904
1286	7845	HCD	564.598	1	-9.91405	3	R	NKANDYTTEYSASVK	G	sp|P01788|HVM19_MOUSE	82	43	4.44819e-11	0.000847752	0.00150489	0
1287	13059	HCD	492.775	0	-4.52087	2	R	QAVDVSPLR	R	sp|P97461|RS5_MOUSE	61	51	4.45953e-11	0.000831055	0.00150489	0.00229358
1288	14862	HCD	479.01	1	-5.13019	4	K	IGRIEDVTPIPSDSTRR	K	sp|P62264|RS14_MOUSE	75	42	4.54225e-11	0.00086981	0.00150489	0.00229358
1289	7387	HCD	624.29	0	-1.46651	2	R	AGELTEDEVER	V	sp|P62270|RS18_MOUSE	93	82	4.55344e-11	0.000856807	0.00150489	0.00119904
1290	8870	HCD	664.33	1	1.70255	2	K	YIC+57.021TTSAIQNR	F	sp|Q91V92|ACLY_MOUSE	52	41	4.60826e-11	0.000867122	0.00150489	0.00229358
1291	17436	HCD	494.608	0	0.98721	3	K	SQIHDIVLVGGSTR	I	sp|P63017|HSP7C_MOUSE	96	68	4.64571e-11	0.000883016	0.00150489	0
1292	20042	HCD	486.79	0	0.376149	2	K	QTALAELVK	H	sp|P07724|ALBU_MOUSE	75	74	4.70502e-11	0.000876804	0.00150489	0.00229358
1293	32061	HCD	486.959	0	-9.02435	3	K	C+57.021KSKRRRRRR	S	sp|Q9JI20|RED2_MOUSE	9	3	4.71936e-11	0.000884141	0.00150489	0.00229358
1294	16647	HCD	409.742	0	-0.14896	2	K	FGPALSVK	V	sp|P29341|PABP1_MOUSE	93	93	4.76499e-11	0.000881948	0.00150489	0.00229358
1295	4919	HCD	581.608	0	0.734595	3	K	ITPAHDQNDYEVGQR	H	sp|Q9Z1Q9|SYVC_MOUSE	47	17	4.82889e-11	0.000920307	0.00150489	0.00229358
1296	18458	HCD	478.759	0	1.84855	2	K	LYSEFLGK	R	sp|P10649|GSTM1_MOUSE	103	103	4.83042e-11	0.000894059	0.00150489	0.00229358
1297	22682	HCD	622.34	1	-8.5866	2	K	DAGQISGLNVLR	V	sp|P38647|GRP75_MOUSE	104	82	4.89684e-11	0.000924903	0.00150489	0
1298	7099	HCD	423.19	0	0.504792	5	K	SKSEEAHAEDSVMDHHFR	K	sp|Q9CY58|PAIRB_MOUSE	80	36	4.94769e-11	0.000949479	0.00150489	0.00229358
1299	15844	HCD	493.268	0	-2.04164	2	R	SEEALALPR	D	sp|P34914|HYES_MOUSE	96	93	4.9527e-11	0.000922959	0.00150489	0.00229358
1300	7838	HCD	442.56	0	10.2747	3	K	VVGYDMSKEAAR	R	sp|P32020|NLTP_MOUSE	78	46	5.05558e-11	0.000954885	0.00150489	0.00229358
1301	3190	HCD	455.23	1	-11.0901	3	R	RTDPNGDYIRR	Y	sp|P97784|CRY1_MOUSE	132	85	5.10773e-11	0.000961106	0.00150489	0.00229358
1302	11376	HCD	425.72	1	-2.54506	4	R	SALEHSVQC+57.021AVDVKR	F	sp|P24270|CATA_MOUSE	55	30	5.11875e-11	0.000975549	0.00150489	0.00229358
1303	13941	HCD	450.27	0	2.03329	2	R	GTVLLSGPR	K	sp|P35980|RL18_MOUSE	100	98	5.12013e-11	0.000954161	0.00150489	0.00229358
1304	8073	HCD	644.81	1	-4.40328	2	R	EATKFAAAYC+57.021R	S	sp|P35486|ODPA_MOUSE	56	36	5.15129e-11	0.000969302	0.00150489	0.00229358
1305	12023	HCD	683.869	1	-15.0479	2	K	VNNKDLPAPIER	T	sp|P01865|GCAM_MOUSE	109	74	5.18044e-11	0.000978469	0.00150489	0
1306	16842	HCD	484.748	0	2.64414	2	R	NC+57.021SSFLIK	R	sp|P41105|RL28_MOUSE	55	53	5.21844e-11	0.000965878	0.00150489	0.00229358
1307	17352	HCD	510.58	0	-5.7977	3	K	IGGHGAEYGAEALER	M	sp|P01942|HBA_MOUSE	64	46	5.24733e-11	0.00100005	0.00150489	0
1308	4172	HCD	508.599	0	0.960052	3	K	IQDKEGIPPDQQR	L	sp|P62984|RL40_MOUSE	55	34	5.25453e-11	0.000995773	0.00150489	0.00119904
1309	6071	HCD	533.757	1	-17.2236	2	K	AQYEDIAQK	S	sp|Q3UV17|K22O_MOUSE	120	105	5.28547e-11	0.000984972	0.00150489	0
1310	10411	HCD	774.898	0	1.73284	2	K	GLNSDSVTEETLRK	A	sp|Q8C196|CPSM_MOUSE	71	43	5.29684e-11	0.00100678	0.00150489	0
1311	24160	HCD	477.305	0	0.511498	2	R	LLLPGELAK	H	sp|Q64475|H2B1B_MOUSE	118	118	5.33329e-11	0.000993884	0.00150489	0.00229358
1312	15742	HCD	739.38	1	-13.5043	2	R	FLEQQNQVLETK	W	sp|Q6IME9|K2C72_MOUSE	120	78	5.40302e-11	0.00102051	0.00150489	0
1313	4636	HCD	508.93	1	-6.01895	3	K	IQDKEGIPPDQQR	L	sp|P62984|RL40_MOUSE	72	54	5.57592e-11	0.00105668	0.00150489	0.00119904
1314	13947	HCD	495.29	1	-7.97285	3	K	RKASGPPVSELITK	A	sp|P43277|H13_MOUSE	94	54	5.62053e-11	0.0010683	0.00150489	0.00229358
1315	18807	HCD	560.863	0	-1.85	2	R	VGLKAPGIIPR	I	sp|Q03265|ATPA_MOUSE	71	59	5.62623e-11	0.00105867	0.00150489	0.00229358
1316	11060	HCD	550.294	0	0.998225	3	K	DTGKTPVEPEVAIHR	I	sp|P60867|RS20_MOUSE	95	56	5.62841e-11	0.00107268	0.00150489	0.00229358
1317	32561	HCD	1426.72	1	2.67544	2	K	TTAPSVYPLAPVC+57.021GDTTGSSVTLGC+57.021LVK	G	sp|P01865|GCAM_MOUSE	90	15	5.63361e-11	0.00109949	0.00150489	0
1318	7423	HCD	421.738	0	-3.97986	2	R	LVDGVPSR	F	sp|P01638|KV5A6_MOUSE	106	106	5.71432e-11	0.00105766	0.00150489	0.00229358
1319	7629	HCD	421.74	0	0.578889	2	R	LVDGVPSR	F	sp|P01638|KV5A6_MOUSE	135	135	5.71432e-11	0.00105766	0.00150489	0.00229358
1320	11742	HCD	691.82	1	-14.2568	2	R	ALEESNYELEGK	I	sp|P02535|K1C10_MOUSE	131	77	5.78953e-11	0.00109351	0.00150489	0
1321	6647	HCD	589.957	0	1.24148	3	K	FKKYEEIDNAPEER	A	sp|Q8BFR5|EFTU_MOUSE	93	56	5.80548e-11	0.00110345	0.00150489	0.00229358
1322	3671	HCD	402.87	0	7.65085	3	R	TDPNGDYIRR	Y	sp|P97784|CRY1_MOUSE	49	45	5.81089e-11	0.00108863	0.00150489	0.00229358
1323	19300	HCD	514.79	0	-4.74251	2	K	LLIYYTSR	L	sp|P04946|KV5AM_MOUSE	121	121	5.89247e-11	0.00109063	0.00150489	0.00229358
1324	7293	HCD	431.748	0	0.494786	4	K	GKDIKGVSEIVHEGKK	I	sp|P12710|FABPL_MOUSE	59	30	5.89765e-11	0.00112678	0.00150489	0.00229358
1325	15377	HCD	870.42	1	-7.82179	2	K	LYAVNAEEC+57.021TTLQAR	W	sp|Q9WUR2|ECI2_MOUSE	45	17	5.92483e-11	0.00112918	0.00150489	0.00229358
1326	15777	HCD	436.27	0	-3.7074	2	K	IVVNLTGR	L	sp|P62245|RS15A_MOUSE	116	116	5.95527e-11	0.00110226	0.00150489	0.00229358
1327	16867	HCD	516.778	0	1.29918	2	R	AGPNIYELR	T	sp|O55125|NIPS1_MOUSE	110	110	6.00284e-11	0.00111866	0.00150489	0.00229358
1328	6247	HCD	586.31	0	5.20505	2	R	SSSAPVASPNVR	R	sp|Q05920|PYC_MOUSE	68	43	6.03886e-11	0.00114061	0.00150489	0.00229358
1329	14657	HCD	425.756	0	1.21854	2	R	LLATGTFK	A	sp|O35973|PER1_MOUSE	109	109	6.07906e-11	0.00112517	0.00150489	0.00229358
1330	10021	HCD	435.26	0	-8.69399	2	R	LAVSQVPR	S	sp|P40142|TKT_MOUSE	100	100	6.09518e-11	0.00112815	0.00150489	0.00229358
1331	16623	HCD	517.271	1	-11.1759	3	R	MQKEITALAPSTMK	I	sp|P60710|ACTB_MOUSE	97	52	6.10014e-11	0.00115946	0.00150489	0
1333	4900	HCD	420.886	0	-0.507556	3	K	LDEREAGITEK	V	sp|P17751|TPIS_MOUSE	99	72	6.11204e-11	0.00115008	0.00223214	0.00340522
1334	5283	HCD	736.668	1	-8.59197	3	R	NSYSC+57.021SVVHEGLHNHHTTK	S	sp|P01865|GCAM_MOUSE	104	38	6.17617e-11	0.00118762	0.00223214	0
1335	14863	HCD	508.78	0	-9.35708	2	R	AQLELEVSK	A	sp|Q9EQK5|MVP_MOUSE	82	78	6.28502e-11	0.00117124	0.00223214	0.00340522
1336	4888	HCD	597.791	0	-0.816809	2	K	YEELQQTAGR	H	sp|Q922U2|K2C5_MOUSE	80	70	6.37794e-11	0.00119486	0.00223214	0.00340522
1337	3339	HCD	468.559	0	-0.716438	3	R	VC+57.021SQYAAYGKEK	S	sp|P21614|VTDB_MOUSE	65	32	6.39679e-11	0.00120821	0.00223214	0.00340522
1338	18414	HCD	613.34	0	-4.08001	3	K	LDKSQIHDIVLVGGSTR	I	sp|P63017|HSP7C_MOUSE	104	56	6.40482e-11	0.00122648	0.00223214	0
1339	14647	HCD	418.56	1	1.21783	3	K	MKEIAEAYLGK	T	sp|P63017|HSP7C_MOUSE	84	67	6.54059e-11	0.00123072	0.00223214	0
1340	8730	HCD	674.835	0	2.35156	2	K	VVTDTDETELAR	Q	sp|Q6ZWX6|IF2A_MOUSE	54	33	6.54263e-11	0.00123576	0.00223214	0.00340522
1341	8053	HCD	495.753	0	-1.29272	2	K	WKIDGSER	Q	sp|P01837|IGKC_MOUSE	94	91	6.59736e-11	0.0012211	0.00223214	0.00119904
1342	13836	HCD	687.37	0	-7.9915	2	R	KAWVANFERPR	M	sp|P97784|CRY1_MOUSE	82	50	6.68867e-11	0.00125859	0.00223214	0
1343	14332	HCD	510.27	0	-7.89443	2	K	IVFSPEEAK	A	sp|Q9Z2I9|SUCB1_MOUSE	57	57	6.71414e-11	0.00125121	0.00223214	0.00340522
1344	16549	HCD	822.43	1	-3.30321	2	K	APAAIGPYSQAVQVDR	T	sp|P52760|UK114_MOUSE	67	26	6.85795e-11	0.00131025	0.00223214	0.00340522
1345	13412	HCD	478.719	0	0.892479	2	R	MPEFYNR	F	sp|P16460|ASSY_MOUSE	97	84	6.86269e-11	0.00125572	0.00223214	0.00119904
1346	11610	HCD	534.31	1	8.40596	2	K	TALIHDGLAR	G	sp|P63323|RS12_MOUSE	69	58	6.86395e-11	0.00128592	0.00223214	0.00340522
1347	14414	HCD	583.29	1	-8.84776	2	K	HYFIEVNSR	L	sp|Q05920|PYC_MOUSE	85	70	6.96751e-11	0.00129843	0.00223214	0.00340522
1349	10776	HCD	447.756	0	0.886038	2	K	VYGTVLSR	H	sp|Q99K67|AASS_MOUSE	63	59	7.00867e-11	0.00129723	0.00296077	0.00450958
1350	14373	HCD	439.248	0	0.138954	2	R	VGASFLQR	F	sp|P05202|AATM_MOUSE	103	95	7.18532e-11	0.00132993	0.00296077	0.00450958
1351	12622	HCD	537.61	0	3.63299	3	R	TIEKFEKEAAEMGK	G	sp|P10126|EF1A1_MOUSE	85	44	7.19431e-11	0.00136743	0.00296077	0
1352	12312	HCD	473.26	1	-14.7155	2	K	VC+57.021NPIITK	L	sp|P63017|HSP7C_MOUSE	68	66	7.23442e-11	0.00133901	0.00296077	0.00450958
1353	9058	HCD	518.283	0	1.05988	2	K	QIYQQLSR	Y	sp|P97784|CRY1_MOUSE	98	98	7.25013e-11	0.00134192	0.00296077	0.00450958
1354	5466	HCD	416.742	0	-0.732289	2	K	TSTSPIVK	S	sp|P01837|IGKC_MOUSE	91	91	7.38226e-11	0.00136638	0.00296077	0.00450958
1355	18796	HCD	441.277	0	0.345788	2	K	IGPLGLSPK	K	sp|P35979|RL12_MOUSE	86	79	7.54388e-11	0.00140584	0.00296077	0.00450958
1357	23908	HCD	640.36	1	17.0288	2	R	LVQGILFSC+57.021GGK	I	sp|Q8JZR0|ACSL5_MOUSE	39	22	7.79502e-11	0.0014723	0.00364964	0.00555556
1358	16088	HCD	524.79	0	-5.58256	2	R	LAADDFRLK	Y	sp|P02535|K1C10_MOUSE	75	71	7.93121e-11	0.00147802	0.00364964	0.00555556
1359	13426	HCD	750.39	0	-5.69362	2	R	AQGSVALSVTQDPAR	K	sp|Q78JT3|3HAO_MOUSE	83	44	7.93816e-11	0.00151288	0.00364964	0.00555556
1360	14615	HCD	811.36	0	-2.18154	2	R	SLTSEDSAVYYC+57.021AR	G	sp|P06330|HVM51_MOUSE	64	26	8.08563e-11	0.00153685	0.00364964	0
1361	23348	HCD	653.01	1	-1.27697	3	R	APQVYVLPPPEEEMTKK	Q	sp|P01865|GCAM_MOUSE	89	40	8.18047e-11	0.00156651	0.00364964	0
1362	16383	HCD	486.804	0	1.06573	2	K	NVPFKIVR	A	sp|P38647|GRP75_MOUSE	85	81	8.18795e-11	0.0015155	0.00364964	0.00555556
1363	9049	HCD	498.263	0	-1.16371	2	K	IKEWYEK	H	sp|P02535|K1C10_MOUSE	83	83	8.337e-11	0.00152548	0.00364964	0.00555556
1364	8417	HCD	450.195	0	-3.186	2	R	FGC+57.021LSC+57.021R	L	sp|P97784|CRY1_MOUSE	83	83	8.38602e-11	0.00153445	0.00364964	0.00555556
1365	8601	HCD	450.196	0	-1.0846	2	R	FGC+57.021LSC+57.021R	L	sp|P97784|CRY1_MOUSE	114	114	8.38602e-11	0.00153445	0.00364964	0.00555556
1366	22125	HCD	594.33	0	-0.308087	2	K	GPLQSVQVFGR	K	sp|P14131|RS16_MOUSE	63	46	8.40663e-11	0.00158185	0.00364964	0.00555556
1367	16357	HCD	410.22	1	4.22078	3	R	DTSKNQFFLK	L	sp|P18531|HVM60_MOUSE	77	66	8.42083e-11	0.00157759	0.00364964	0
1368	8288	HCD	521.283	0	0.35126	2	K	VDPEIQNVK	S	sp|Q3TTY5|K22E_MOUSE	49	46	8.52573e-11	0.00158881	0.00364964	0.00555556
1369	9983	HCD	403.219	0	-1.5137	2	K	VGVNGFGR	I	sp|P16858|G3P_MOUSE	94	90	8.52733e-11	0.00157832	0.00364964	0.00555556
1370	16370	HCD	453.241	0	-0.605986	2	K	GLLDVTC+57.021K	T	sp|Q9WTX5|SKP1_MOUSE	86	86	8.59279e-11	0.00159043	0.00364964	0.00555556
1371	18254	HCD	555.741	0	17.4627	2	K	WEC+57.021PFDEK	G	sp|Q3V0Q1|DYH12_MOUSE	91	68	8.68775e-11	0.00160801	0.00364964	0.00555556
1372	6721	HCD	418.883	0	0.874257	3	R	GPTIKPC+57.021PPC+57.021K	C	sp|P01865|GCAM_MOUSE	43	39	8.81986e-11	0.00165961	0.00364964	0
1373	15317	HCD	761.87	0	0.560786	2	K	ALC+57.021SEFQGSVATPR	N	sp|P41317|MBL2_MOUSE	61	28	8.92871e-11	0.00169709	0.00364964	0.00555556
1374	25821	HCD	631.35	0	8.41071	2	R	AITGASLADIMAK	R	sp|Q8BP67|RL24_MOUSE	50	32	8.92908e-11	0.00169213	0.00364964	0.00555556
1375	18845	HCD	835.91	1	1.499	2	K	LSIEYDSEPFGKER	D	sp|P97784|CRY1_MOUSE	99	51	9.10506e-11	0.00173061	0.00364964	0
1377	21940	HCD	556.63	1	-17.2972	3	K	TLAFASVDLTNKTTGK	L	sp|Q9CQR4|ACO13_MOUSE	126	49	9.1335e-11	0.001745	0.00436681	0
1378	12485	HCD	658.332	0	-0.648982	2	R	HYC+57.021IVANPVSR	D	sp|Q9EQK5|MVP_MOUSE	62	43	9.30127e-11	0.00175019	0.00436681	0.00663717
1379	11944	HCD	409.724	0	0	2	R	VDPVNFK	L	sp|P01942|HBA_MOUSE	105	105	9.31345e-11	0.00170415	0.00436681	0.00663717
1380	12506	HCD	449.862	0	-1.42459	3	R	HNSYTC+57.021EATHK	T	sp|P01837|IGKC_MOUSE	57	39	9.41157e-11	0.00177095	0.00436681	0
1382	18248	HCD	424.734	0	-1.65257	2	R	IGADFLGR	W	sp|P05201|AATC_MOUSE	56	56	9.63462e-11	0.00178327	0.00507983	0.00663717
1383	10404	HCD	447.71	1	-10.2336	2	R	LC+57.021DFNPK	S	sp|O08585|CLCA_MOUSE	52	51	9.69442e-11	0.00177386	0.00507983	0.00663717
1384	19288	HCD	928.02	1	-2.00591	2	-	EVQLVESGGGLVKPGGSLK	L	sp|P18528|HVM57_MOUSE	113	55	9.75614e-11	0.00187602	0.00507983	0
1385	16343	HCD	614.32	0	-3.37802	2	R	DTSKNQFFLK	L	sp|P18531|HVM60_MOUSE	45	33	9.81655e-11	0.00183907	0.00507983	0
1387	9540	HCD	494.751	0	0.185048	2	K	LIEVDDER	K	sp|P62754|RS6_MOUSE	123	123	9.82767e-11	0.001819	0.00576784	0.00770077
1388	4818	HCD	723.86	0	0.590233	2	R	ASMQQQQQLASAR	N	sp|Q9CY57|CHTOP_MOUSE	49	20	9.90322e-11	0.00187673	0.00576784	0.00770077
1389	5450	HCD	605.971	0	0.201446	3	K	HIAEEADRKYEEVAR	K	sp|P21107|TPM3_MOUSE	92	48	9.9173e-11	0.00189007	0.00576784	0
1390	9903	HCD	528.25	0	4.044	3	R	KNANC+57.021SIEESFQR	F	sp|P38060|HMGCL_MOUSE	91	55	9.96215e-11	0.0018879	0.00576784	0.00770077
1391	11881	HCD	461.58	1	-14.7086	3	K	VNNKDLPSPIER	T	sp|P01867|IGG2B_MOUSE	118	79	9.96775e-11	0.00188268	0.00576784	0
1392	7227	HCD	458.248	0	-0.266385	2	K	TLADGVPSR	F	sp|P01635|KV5A3_MOUSE	90	78	1.00303e-10	0.00186919	0.00576784	0.00770077
1393	31883	HCD	735.76	1	3.34835	3	K	GLVRAPQVYILPPPAEQLSR	K	sp|P01867|IGG2B_MOUSE	108	40	1.00417e-10	0.00193464	0.00576784	0.00119904
1394	5252	HCD	449.23	0	-7.74431	3	R	QYDISNPQKPR	L	sp|Q63836|SBP2_MOUSE	36	21	1.00419e-10	0.00188955	0.00576784	0.00770077
1395	24901	HCD	688	0	-0.975852	3	R	FSGVPDRFSGSGSGTDFTLK	I	sp|P01631|KV2A7_MOUSE	116	54	1.00673e-10	0.00193956	0.00576784	0
1397	7690	HCD	599.96	0	2.33984	3	K	VYRIEGDETSTEAATR	L	sp|Q923G2|RPAB3_MOUSE	105	48	1.03409e-10	0.00197569	0.00637845	0.00863931
1398	5235	HCD	533.26	0	-7.89745	2	K	AQYEDIAQK	S	sp|Q3UV17|K22O_MOUSE	44	39	1.0354e-10	0.00192952	0.00637845	0
1399	13084	HCD	522.62	0	-4.20431	3	R	DLLHPSLEEEKKK	H	sp|Q6ZWY3|RS27L_MOUSE	85	41	1.04551e-10	0.00198133	0.00637845	0.00863931
1400	8107	HCD	546.769	0	-0.781401	2	R	SSPYPTDVAR	V	sp|Q60597|ODO1_MOUSE	105	80	1.04701e-10	0.00196151	0.00637845	0.00863931
1401	12336	HCD	452.74	0	-6.67319	2	K	FAAVGFHR	A	sp|Q8VCR2|DHB13_MOUSE	56	53	1.04829e-10	0.00194028	0.00637845	0.00863931
1402	3815	HCD	440.234	0	0.831856	3	R	FRTEAAAATPQR	S	sp|Q9JLV1|BAG3_MOUSE	87	67	1.04943e-10	0.00198214	0.00637845	0.00863931
1403	11210	HCD	441.26	0	5.11787	3	K	VNNKALPAPIER	T	sp|P03987|IGHG3_MOUSE	72	61	1.06299e-10	0.00200775	0.00637845	0.00863931
1404	15370	HCD	739.38	1	-13.5043	2	R	FLEQQNQVLETK	W	sp|Q6IME9|K2C72_MOUSE	110	66	1.06717e-10	0.00201564	0.00637845	0
1405	21342	HCD	688.33	1	-7.42137	3	R	FSGVPDRFSGSGSGTDFTLK	I	sp|P01631|KV2A7_MOUSE	102	51	1.0767e-10	0.00207436	0.00637845	0
1406	13399	HCD	715.364	0	2.38898	2	R	IEDVTPIPSDSTR	R	sp|P62264|RS14_MOUSE	80	47	1.08388e-10	0.00205404	0.00637845	0.00863931
1407	9760	HCD	827.444	0	4.2783	2	K	C+57.021KVNNKDLPAPIER	T	sp|P01865|GCAM_MOUSE	67	22	1.08638e-10	0.00206489	0.00637845	0
1408	4193	HCD	483.731	0	-1.19867	2	R	DYSKYYK	T	sp|P02535|K1C10_MOUSE	70	65	1.09289e-10	0.00199974	0.00637845	0.00863931
1409	9447	HCD	583.29	0	-10.3592	2	R	LENEIQTYR	S	sp|P02535|K1C10_MOUSE	62	54	1.09944e-10	0.00204886	0.00637845	0
1410	14460	HCD	479.25	0	-5.98568	3	R	FGAPPHAGGGIGLER	V	sp|Q922B2|SYDC_MOUSE	108	58	1.10259e-10	0.00210135	0.00637845	0.00863931
1411	15452	HCD	490.254	0	1.43172	2	R	DYLHYIR	K	sp|P62281|RS11_MOUSE	66	66	1.12999e-10	0.00206761	0.00637845	0.00863931
1412	1697	HCD	578.987	1	-12.3044	3	K	AGAKAPAKAQASAPAQAPK	G	sp|P47915|RL29_MOUSE	39	7	1.15089e-10	0.00221306	0.00637845	0.00863931
1413	5864	HCD	631.82	0	-0.48301	2	K	GTVQTGLDTSQR	V	sp|O88492|PLIN4_MOUSE	86	58	1.15362e-10	0.00217893	0.00637845	0.00863931
1414	7759	HCD	450.2	0	0.406721	3	R	SEDTALYYC+57.021AR	L	sp|P01808|HVM38_MOUSE	72	53	1.15942e-10	0.00218165	0.00637845	0
1415	7506	HCD	456.913	0	0.400745	3	R	QSVESDIHGLRK	V	sp|P05784|K1C18_MOUSE	118	73	1.1911e-10	0.00224972	0.00637845	0.00863931
1416	4362	HCD	563.31	0	9.20991	4	R	EADSKPVSQKSPPPAEKVEVK	V	sp|Q9JLV1|BAG3_MOUSE	54	16	1.19263e-10	0.0023019	0.00637845	0.00863931
1417	19543	HCD	597.82	1	11.0886	2	K	ALELDSNLYR	I	sp|Q8VDD5|MYH9_MOUSE	77	65	1.21414e-10	0.0022746	0.00637845	0.00863931
1418	11948	HCD	610.81	0	-2.49812	2	R	IASPEGQDYLK	G	sp|Q99LF4|RTCB_MOUSE	70	49	1.21775e-10	0.0022914	0.00637845	0.00863931
1419	11056	HCD	683.376	0	-3.03667	2	K	VNNKDLPAPIER	T	sp|P01865|GCAM_MOUSE	107	66	1.22398e-10	0.00231182	0.00637845	0
1420	7367	HCD	453.916	0	-0.941245	3	K	KDRVTDALNATR	A	sp|P63038|CH60_MOUSE	107	67	1.22457e-10	0.00231294	0.00637845	0.00863931
1422	11511	HCD	442.764	0	1.44743	2	K	ILVPEGTR	D	sp|Q8BMF4|ODP2_MOUSE	91	91	1.23393e-10	0.00228388	0.00706215	0.00956429
1423	8678	HCD	559.249	0	1.74621	3	K	ATAGDTHLGGEDFDNR	L	sp|P17879|HS71B_MOUSE	67	29	1.23959e-10	0.00236831	0.00706215	0.00956429
1424	17990	HCD	439.753	0	-0.208191	2	K	FGELALTK	E	sp|Q8BMS1|ECHA_MOUSE	24	23	1.24143e-10	0.00229776	0.00706215	0.00956429
1425	13632	HCD	455.753	0	-0.334804	2	K	DLPAPIER	T	sp|P01865|GCAM_MOUSE	95	95	1.24918e-10	0.00231211	0.00706215	0.00956429
1426	13795	HCD	455.753	0	-0.468725	2	K	DLPAPIER	T	sp|P01865|GCAM_MOUSE	103	103	1.24918e-10	0.00231211	0.00706215	0.00956429
1428	14180	HCD	790.05	1	-3.14213	3	R	ITNKVFANPEDC+57.021AGFGKGENAK	K	sp|Q91VS7|MGST1_MOUSE	97	33	1.28409e-10	0.00248277	0.00763889	0
1429	18234	HCD	571.798	0	-14.7302	4	K	IIKVLQGC+57.021ADC+57.021LPQDIAELK	T	sp|Q9DB00|GON4L_MOUSE	107	40	1.29838e-10	0.00250146	0.00763889	0.00956429
1430	29952	HCD	834.49	1	-2.66997	2	R	QAQIEVVPSASALIIK	A	sp|P35979|RL12_MOUSE	83	37	1.30143e-10	0.00248646	0.00763889	0.00119904
1431	6059	HCD	472.51	0	-5.94189	4	R	VREELIDKKTENAVSR	M	sp|Q8BU30|SYIC_MOUSE	52	23	1.30564e-10	0.00249451	0.00763889	0.00956429
1432	5955	HCD	418.883	0	0.655693	3	R	GPTIKPC+57.021PPC+57.021K	C	sp|P01865|GCAM_MOUSE	54	39	1.30832e-10	0.00246184	0.00763889	0
1433	15082	HCD	572.968	1	-12.3272	3	-	PGVTVKDVNQQEFVR	A	sp|Q9CZX8|RS19_MOUSE	156	68	1.30898e-10	0.00249471	0.00763889	0.00119904
1434	13536	HCD	685.868	1	-13.5791	2	R	GAAQNIIPASTGAAK	A	sp|P16858|G3P_MOUSE	99	65	1.31507e-10	0.00250631	0.00763889	0
1435	21447	HCD	962.17	0	-16.1756	3	R	LEEKTNQMAATIKQLEQRLRQAER	G	sp|Q9D394-2|RUFY3_MOUSE	110	24	1.31696e-10	0.00255474	0.00763889	0.00956429
1436	18012	HCD	744.35	0	-5.82182	2	R	TTPSYVAFTDTER	L	sp|P17879|HS71B_MOUSE	62	29	1.32496e-10	0.0025109	0.00763889	0
1437	11150	HCD	835.93	1	-11.7976	2	K	C+57.021KVNNKDLPSPIER	T	sp|P01867|IGG2B_MOUSE	55	27	1.3367e-10	0.00254068	0.00763889	0
1438	13240	HCD	435.77	0	-9.17403	2	K	QLIVGVNK	M	sp|P10126|EF1A1_MOUSE	85	77	1.33948e-10	0.00247924	0.00763889	0.00956429
1439	11814	HCD	449.863	0	0.203512	3	R	HNSYTC+57.021EATHK	T	sp|P01837|IGKC_MOUSE	71	39	1.35054e-10	0.00254128	0.00763889	0
1440	22758	HCD	743.39	1	4.21752	3	K	GSVRAPQVYVLPPPEEEMTK	K	sp|P01865|GCAM_MOUSE	124	41	1.36123e-10	0.00262254	0.00763889	0
1441	16680	HCD	510.58	0	-5.7977	3	K	IGGHGAEYGAEALER	M	sp|P01942|HBA_MOUSE	76	51	1.36269e-10	0.00259705	0.00763889	0
1442	9510	HCD	507.78	0	-8.95482	2	K	SGKYVLGYK	Q	sp|P62889|RL30_MOUSE	65	51	1.37608e-10	0.00256439	0.00763889	0.00956429
1443	8970	HCD	461.97	0	-0.726656	4	K	TSKWEKTDSFSC+57.021NVR	H	sp|P01867|IGG2B_MOUSE	68	38	1.39602e-10	0.00266059	0.00763889	0
1444	15859	HCD	577.95	1	-3.23924	3	R	AGDKDDITEPAVC+57.021ALR	H	sp|Q02257|PLAK_MOUSE	69	32	1.40891e-10	0.0026918	0.00763889	0.00956429
1445	29072	HCD	951.5	0	-2.11682	2	R	LYIDETVNDNIPLNLR	V	sp|Q8K0E8|FIBB_MOUSE	50	19	1.41228e-10	0.00269824	0.00763889	0.00956429
1446	10736	HCD	419.715	0	-0.872522	2	R	AC+57.021YGVLR	F	sp|P62908|RS3_MOUSE	84	84	1.41933e-10	0.00259705	0.00763889	0.00956429
1447	16508	HCD	839.91	1	0.837443	2	K	NQLTSNPENTVFDAK	R	sp|P20029|GRP78_MOUSE	43	5	1.44443e-10	0.00275285	0.00763889	0
1448	14924	HCD	836.42	1	3.68856	2	K	ITASGYTTGIEVDSTR	F	sp|Q3UIR3|DTX3L_MOUSE	38	7	1.4534e-10	0.00277679	0.00763889	0.00956429
1449	921	HCD	467.945	0	-0.84781	4	R	HYNGEAYEDDEHHPR	G	sp|P63037|DNJA1_MOUSE	52	24	1.47238e-10	0.00280612	0.00763889	0.00956429
1450	11650	HCD	422.552	0	0.794443	3	R	KESYSVYVYK	V	sp|Q64475|H2B1B_MOUSE	79	58	1.48411e-10	0.00278038	0.00763889	0.00119904
1452	34281	HCD	610.04	1	-13.0792	3	K	RKRKKEREKEKRR	S	sp|Q6ZPZ3|ZC3H4_MOUSE	37	14	1.49572e-10	0.0028345	0.00831601	0.0106045
1453	12874	HCD	449.86	0	-6.85159	3	R	HNSYTC+57.021EATHK	T	sp|P01837|IGKC_MOUSE	57	30	1.51719e-10	0.00285486	0.00831601	0
1454	20223	HCD	829.95	1	1.58335	2	R	VIGLSSDLQQVGGASAR	I	sp|Q9DCH4|EIF3F_MOUSE	57	20	1.5397e-10	0.00294842	0.00831601	0.0106045
1456	8720	HCD	510.256	1	-14.5455	2	R	SLQSVAEER	A	sp|Q9CZM2|RL15_MOUSE	68	55	1.54182e-10	0.00287326	0.00894701	0.00119904
1457	15922	HCD	442.77	0	2.20558	2	K	GAAVALNIR	T	sp|P17717|UDB17_MOUSE	111	104	1.55962e-10	0.00290643	0.00894701	0.0115789
1458	13236	HCD	508.25	1	4.59672	4	K	TLEDEAKTHEAQIQEMR	Q	sp|Q8VDD5|MYH9_MOUSE	53	26	1.563e-10	0.00299304	0.00894701	0.0115789
1459	1696	HCD	434.493	1	-11.981	4	K	AGAKAPAKAQASAPAQAPK	G	sp|P47915|RL29_MOUSE	74	47	1.57868e-10	0.00303567	0.00894701	0.00863931
1460	4703	HCD	426.55	1	3.12824	3	R	AYDPKGGLDNAR	R	sp|P15105|GLNA_MOUSE	57	40	1.59353e-10	0.00300981	0.00894701	0.0115789
1461	24111	HCD	498.81	0	3.97677	2	K	AVDLQILPK	I	sp|P47911|RL6_MOUSE	81	80	1.61829e-10	0.00301577	0.00894701	0.0115789
1462	10093	HCD	441.232	0	1.10663	2	R	AC+57.021LYAGVK	I	sp|P15105|GLNA_MOUSE	74	73	1.6432e-10	0.00304139	0.00894701	0.0115789
1463	16738	HCD	526.25	0	-5.91501	2	R	GDFC+57.021IQVGR	N	sp|Q01768|NDKB_MOUSE	86	73	1.65188e-10	0.00307835	0.00894701	0.0115789
1464	7026	HCD	458.248	0	-0.998942	2	K	TLADGVPSR	F	sp|P01635|KV5A3_MOUSE	86	79	1.65298e-10	0.00308041	0.00894701	0.00770077
1465	6791	HCD	589.253	1	-15.4965	2	R	LEC+57.021VEPNC+57.021R	S	sp|P83882|RL36A_MOUSE	62	55	1.65849e-10	0.00309068	0.00894701	0.0115789
1467	10671	HCD	510.586	0	6.09655	3	K	IGGHGAEYGAEALER	M	sp|P01942|HBA_MOUSE	92	61	1.66086e-10	0.00316533	0.00945307	0
1468	2311	HCD	510.246	1	-13.3647	3	K	RPSQEEDAQSVGPK	V	sp|P97784|CRY1_MOUSE	139	83	1.6633e-10	0.00316145	0.00945307	0
1469	25369	HCD	538.81	1	-4.93019	2	K	ELFTTPVLR	A	sp|P26151|FCGR1_MOUSE	39	26	1.66693e-10	0.0031064	0.00945307	0.0123584
1470	8875	HCD	719.33	1	-0.974992	2	K	EQQC+57.021VIMAENSK	T	sp|P20918|PLMN_MOUSE	32	18	1.68695e-10	0.00318627	0.00945307	0.0123584
1471	15164	HCD	595.32	0	1.43535	2	K	TIDDLEDKLK	C	sp|P21107-2|TPM3_MOUSE	48	35	1.71502e-10	0.00321298	0.00945307	0.0123584
1472	11733	HCD	406.256	0	0.751192	2	R	ILGPGLNK	A	sp|P53026|RL10A_MOUSE	103	103	1.72205e-10	0.00318734	0.00945307	0.0123584
1473	6940	HCD	522.26	0	-3.73974	3	K	ALAAGGYDVEKNNSR	I	sp|P43276|H15_MOUSE	66	30	1.72509e-10	0.00328774	0.00945307	0.0123584
1474	10722	HCD	422.557	1	-12.7433	3	R	HEGLKNYYLK	K	sp|P01867|IGG2B_MOUSE	48	34	1.74422e-10	0.00326768	0.00945307	0
1475	4887	HCD	403.195	1	-16.8402	3	R	RTDPNGDYIR	R	sp|P97784|CRY1_MOUSE	82	62	1.77455e-10	0.00332451	0.00945307	0.0123584
1476	31721	HCD	516.309	0	13.4766	3	K	QNYTRPRKKLSR	I	sp|Q8BGE5|FANCM_MOUSE	30	12	1.79329e-10	0.00338712	0.00945307	0.0123584
1477	17697	HCD	462.277	0	0.726174	3	K	KLATEAGVEVIVR	I	sp|P97784|CRY1_MOUSE	113	76	1.80031e-10	0.00341172	0.00945307	0.0123584
1478	13206	HCD	715.37	0	11.0064	2	R	IEDVTPIPSDSTR	R	sp|P62264|RS14_MOUSE	43	22	1.80904e-10	0.00342827	0.00945307	0.00863931
1479	12571	HCD	633.837	0	-1.34812	2	R	TKYETELNLR	M	sp|Q6IFX2|K1C42_MOUSE	89	58	1.86106e-10	0.00348658	0.00945307	0.00119904
1480	17603	HCD	951.43	1	-3.49695	2	R	FSPDGELYASGSEDGTLR	L	sp|Q9Z1Z2|STRAP_MOUSE	76	27	1.87975e-10	0.00360731	0.00945307	0.0123584
1481	22534	HCD	470.24	1	-7.46893	2	R	NIMEYLR	G	sp|E9PV24|FIBA_MOUSE	90	90	1.88088e-10	0.00344158	0.00945307	0.0123584
1482	21224	HCD	833.95	0	-4.97676	2	K	TLAFASVDLTNKTTGK	L	sp|Q9CQR4|ACO13_MOUSE	60	14	1.89805e-10	0.00362633	0.00945307	0
1483	11072	HCD	478.763	0	-2.03976	2	R	LTFKYER	D	sp|P26443|DHE3_MOUSE	62	55	1.96641e-10	0.00359807	0.00945307	0.0123584
1484	21814	HCD	665.89	0	7.33282	2	K	HPPAVYLLPPAR	E	sp|P01872|IGHM_MOUSE	37	14	1.97169e-10	0.00372408	0.00945307	0.0123584
1485	4842	HCD	425.501	0	-2.22336	4	R	IAAEEKKRLDELKR	I	sp|Q06185|ATP5I_MOUSE	100	48	1.99656e-10	0.00379489	0.00945307	0.0123584
1486	14315	HCD	622.84	1	1.03147	2	R	VNSAAFPAPIEK	T	sp|P01869|IGH1M_MOUSE	69	39	2.01169e-10	0.00379964	0.00945307	0
1487	4831	HCD	431.565	0	-1.5557	3	K	GRFTISRDNAR	N	sp|P18527|HVM56_MOUSE	62	43	2.0515e-10	0.00386024	0.00945307	0.0123584
1488	18287	HCD	487.99	1	-6.78766	4	R	DKVSSKNSLESYAFNMK	A	sp|P63017|HSP7C_MOUSE	62	33	2.0567e-10	0.00393844	0.00945307	0.0123584
1489	11524	HCD	741.39	0	4.61024	3	K	GLDGSLQTAAFLNLPSLFDSR	W	sp|Q05722|CO9A1_MOUSE	87	33	2.08617e-10	0.00402654	0.00945307	0.0123584
1490	22476	HCD	562.79	0	-0.759157	2	K	LQDPFSVYR	C	sp|Q9CQA3|SDHB_MOUSE	60	49	2.09954e-10	0.0039126	0.00945307	0.0123584
1491	26021	HCD	488.25	1	13.3294	2	-	MSFLFSSR	S	sp|Q921Y0|MOB1A_MOUSE	30	17	2.12755e-10	0.00393787	0.00945307	0.0123584
1492	7789	HCD	542.01	1	-7.18112	4	K	QALEHKDRDDYVPYTGEK	K	sp|Q9JHJ0|TMOD3_MOUSE	79	28	2.12994e-10	0.00408743	0.00945307	0.0123584
1493	15422	HCD	403.742	0	-1.1338	2	K	VQVSVFK	G	sp|P16460|ASSY_MOUSE	84	84	2.14261e-10	0.00392048	0.00945307	0.0123584
1494	14598	HCD	420.236	0	1.88813	3	R	FPGQLNADLRK	L	sp|A2AQ07|TBB1_MOUSE	93	65	2.15275e-10	0.00405076	0.00945307	0.0123584

## Sheet: unipeptide
Peptide	# of Peptide	Protein name	SpecEValue
FPGQLNADLR	1	sp|A2AQ07|TBB1_MOUSE	3.56407e-12
FPGQLNADLRK	1	sp|A2AQ07|TBB1_MOUSE	2.15275e-10
VAVC+57.021DIPPR	1	sp|A2AQ07|TBB1_MOUSE	1.33893e-11
SVDEGLLDSKR	1	sp|A2AS89|SPEB_MOUSE	3.96341e-11
AQQIQALQSNVR	1	sp|E9PV24|FIBA_MOUSE	7.73459e-15
NIMEYLR	1	sp|E9PV24|FIBA_MOUSE	1.88088e-10
SQLQEAPPEWK	1	sp|E9PV24|FIBA_MOUSE	2.667e-13
AIKEKEYEIER	1	sp|E9Q557|DESP_MOUSE	3.92165e-13
LQRLEDELNR	1	sp|E9Q557|DESP_MOUSE	3.03123e-11
SLNESKIEIER	1	sp|E9Q557|DESP_MOUSE	2.1897e-12
FNENAVVR	1	sp|O08573|LEG9_MOUSE	5.35122e-12
NTQINNSWGQEER	1	sp|O08573|LEG9_MOUSE	3.78565e-11
LC+57.021DFNPK	1	sp|O08585|CLCA_MOUSE	9.69442e-11
DFTPVC+57.021TTELGR	1	sp|O08709|PRDX6_MOUSE	5.58621e-13
QITLNDLPVGR	2	sp|O08807|PRDX4_MOUSE	4.51955e-14
VYNVTQHAVGIIVNK	1	sp|O09167|RL21_MOUSE	1.12015e-17
ISGQKVNEAAC+57.021DIAR	6	sp|O35490|BHMT1_MOUSE	2.38304e-19
GFLPPASEK	4	sp|O35490|BHMT1_MOUSE	7.02835e-12
YIGGC+57.021C+57.021GFEPYHIR	4	sp|O35490|BHMT1_MOUSE	4.61789e-20
AGSNVMQTFTFYASEDKLENRGNYVAEK	3	sp|O35490|BHMT1_MOUSE	7.30735e-16
VNEAAC+57.021DIAR	3	sp|O35490|BHMT1_MOUSE	5.08517e-14
AGASIVGVNC+57.021HFDPSVSLQTVK	2	sp|O35490|BHMT1_MOUSE	1.37252e-26
AIAEELAPERGFLPPASEK	2	sp|O35490|BHMT1_MOUSE	1.32744e-11
ASGKPVAATMC+57.021IGPEGDLHGVPPGEC+57.021AVR	2	sp|O35490|BHMT1_MOUSE	2.65826e-18
GNYVAEKISGQK	2	sp|O35490|BHMT1_MOUSE	5.09925e-16
LNAGEVVIGDGGFVFALEKR	2	sp|O35490|BHMT1_MOUSE	8.00816e-25
AIAEELAPER	1	sp|O35490|BHMT1_MOUSE	1.01097e-12
IASGRPYNPSMSRPDAWGVTK	1	sp|O35490|BHMT1_MOUSE	3.26527e-11
LMKEGLEAAR	1	sp|O35490|BHMT1_MOUSE	2.94332e-11
LNAGEVVIGDGGFVFALEK	1	sp|O35490|BHMT1_MOUSE	8.49001e-20
QGFIDLPEFPFGLEPR	1	sp|O35490|BHMT1_MOUSE	2.2794e-20
QQLEVFMK	1	sp|O35490|BHMT1_MOUSE	4.35315e-11
QVADEGDALVAGGVSQTPSYLSC+57.021K	1	sp|O35490|BHMT1_MOUSE	2.54736e-13
HTGPNSPDTANDGFVR	2	sp|O35737|HNRH1_MOUSE	1.32036e-16
YLESC+57.021NIPSTTK	2	sp|O35973|PER1_MOUSE	8.69477e-16
AVLSLHTQKEEQAFLNR	1	sp|O35973|PER1_MOUSE	1.30939e-17
DAASVLKQDRER	1	sp|O35973|PER1_MOUSE	2.95571e-11
LLATGTFK	1	sp|O35973|PER1_MOUSE	6.07906e-11
YFGSIDSSEAEAGAAR	1	sp|O35973|PER1_MOUSE	1.7545e-18
FYGPEGPYGVFAGR	1	sp|O55022|PGRC1_MOUSE	2.31867e-19
IVRGDQPGASGDNDDDEPPPLPR	1	sp|O55022|PGRC1_MOUSE	2.91682e-15
TFEVC+57.021DLPVR	1	sp|O55029|COPB2_MOUSE	1.24165e-13
AGPNIYELR	1	sp|O55125|NIPS1_MOUSE	6.00284e-11
LVPVGYGIK	1	sp|O70251|EF1B_MOUSE	8.9674e-12
DTVTTGLTGAVNVAK	1	sp|O88492|PLIN4_MOUSE	3.7597e-14
GTVQTGLDTSQR	1	sp|O88492|PLIN4_MOUSE	1.15362e-10
VIGSGC+57.021NLDSAR	1	sp|P00342|LDHC_MOUSE	1.70687e-15
YYTYLVMNK	1	sp|P01027|CO3_MOUSE	1.13923e-13
IIPSTEDPNEDIVER	1	sp|P01592|IGJ_MOUSE	9.77654e-18
FSGVPDRFSGSGSGTDFTLK	4	sp|P01631|KV2A7_MOUSE	1.76842e-14
FSGSGSGTDFTLK	1	sp|P01631|KV2A7_MOUSE	2.76918e-17
VSNRFSGVPDR	1	sp|P01631|KV2A7_MOUSE	2.38581e-13
KVTISC+57.021TASESLYSSK	1	sp|P01632|KV1A1_MOUSE	9.28392e-16
LLIYSASYR	2	sp|P01633|KV5A1_MOUSE	6.48311e-12
FMSTSVGDR	1	sp|P01633|KV5A1_MOUSE	3.72312e-13
QGKSPQLLVYNAK	2	sp|P01635|KV5A3_MOUSE	6.75158e-13
SPQLLVYNAK	2	sp|P01635|KV5A3_MOUSE	7.67183e-13
TLADGVPSR	2	sp|P01635|KV5A3_MOUSE	1.00303e-10
FSGSGSGTQYSLK	1	sp|P01635|KV5A3_MOUSE	3.19038e-17
FSGSGSGTQFSLK	2	sp|P01636|KV5A4_MOUSE	4.32518e-17
LVDGVPSR	2	sp|P01638|KV5A6_MOUSE	5.71432e-11
MTQSPSSMYASLGER	2	sp|P01638|KV5A6_MOUSE	1.62974e-17
LIYATSSLDSGVPKR	1	sp|P01639|KV5A7_MOUSE	1.31723e-18
YASESISGIPSR	2	sp|P01642|KV5A9_MOUSE	3.63755e-15
LLIYYTSSLHSGVPSR	1	sp|P01643|KV5AA_MOUSE	3.03814e-18
TFGGGTKLEIK	2	sp|P01645|KV5AC_MOUSE	2.20916e-13
DIQMTQTTSSLSASLGDR	1	sp|P01645|KV5AC_MOUSE	6.0665e-20
TFGGGTKLEIKR	1	sp|P01645|KV5AC_MOUSE	8.36182e-16
DIVLTQSPASLAVSLGQR	4	sp|P01654|KV3A1_MOUSE	2.67454e-21
LLIYAASNQGSGVPAR	4	sp|P01654|KV3A1_MOUSE	5.14446e-20
ASNLESGIPAR	1	sp|P01660|KV3A8_MOUSE	1.49464e-13
LLIYLASNLESGVPAR	2	sp|P01662|KV3AA_MOUSE	3.14267e-19
NIVLTQSPASLAVSLGQR	1	sp|P01662|KV3AA_MOUSE	2.62428e-20
LLIYAASNLESGIPAR	4	sp|P01665|KV3AD_MOUSE	4.60132e-19
YASNLESGVPAR	1	sp|P01674|KV3AM_MOUSE	5.29687e-16
TSNLASGVPAR	1	sp|P01680|KV4A1_MOUSE	1.51422e-14
FSGSLIGDK	1	sp|P01727|LV1E_MOUSE	6.91804e-12
SLTSEDSAVYFC+57.021AR	2	sp|P01746|HVM02_MOUSE	2.16441e-18
EVQLQQSGPELVKPGASVK	4	sp|P01756|HVM12_MOUSE	3.05993e-18
ALEWLGFIR	1	sp|P01786|HVM17_MOUSE	7.73019e-12
NKANDYTTEYSASVK	2	sp|P01788|HVM19_MOUSE	1.22392e-16
AEDTAIYYC+57.021AR	1	sp|P01788|HVM19_MOUSE	9.64941e-15
ANDYTTEYSASVK	1	sp|P01788|HVM19_MOUSE	1.96538e-14
NKANDYTTEYSASVKGR	1	sp|P01788|HVM19_MOUSE	5.11984e-16
EVKLEESGGGLVQPGGSMK	1	sp|P01797|HVM28_MOUSE	1.07731e-13
LKSNNYATHYAESVKGR	1	sp|P01801|HVM32_MOUSE	8.81094e-18
SNNYATHYAESVKGR	1	sp|P01801|HVM32_MOUSE	2.42241e-12
AEDTGIYYC+57.021TR	1	sp|P01804|HVM35_MOUSE	3.26729e-11
SEDTALYYC+57.021AR	11	sp|P01808|HVM38_MOUSE	3.30799e-15
LLESGGGLVQPGGSLK	1	sp|P01808|HVM38_MOUSE	4.09977e-19
LSC+57.021AASGFDFSR	1	sp|P01808|HVM38_MOUSE	4.35386e-14
NTLYLQMSK	1	sp|P01808|HVM38_MOUSE	9.64251e-12
NDAKNTLYLQMSK	1	sp|P01812|HVM42_MOUSE	2.58421e-12
HNSYTC+57.021EATHKTSTSPIVK	9	sp|P01837|IGKC_MOUSE	6.8609e-26
HNSYTC+57.021EATHK	4	sp|P01837|IGKC_MOUSE	4.25489e-12
WKIDGSER	2	sp|P01837|IGKC_MOUSE	1.18839e-11
DEYERHNSYTC+57.021EATHK	1	sp|P01837|IGKC_MOUSE	1.08348e-12
DSTYSMSSTLTLTKDEYER	1	sp|P01837|IGKC_MOUSE	2.38423e-13
IDGSERQNGVLNSWTDQDSK	1	sp|P01837|IGKC_MOUSE	4.48952e-16
QNGVLNSWTDQDSK	1	sp|P01837|IGKC_MOUSE	8.74565e-17
TSTSPIVK	1	sp|P01837|IGKC_MOUSE	7.38226e-11
TSTSPIVKSFNRNEC+57.021	1	sp|P01837|IGKC_MOUSE	9.40107e-14
HSSYSC+57.021QVTHEGHTVEK	1	sp|P01843|LAC1_MOUSE	9.5831e-14
YMASSYLTLTAR	1	sp|P01843|LAC1_MOUSE	2.27177e-12
SHNSFTC+57.021QVTHEGDTVEK	1	sp|P01845|LAC3_MOUSE	7.98777e-21
NTATVLDSDGSYFMYSK	2	sp|P01864|GCAB_MOUSE	8.48409e-22
GPVRAPQVYVLPPPAEEMTKK	1	sp|P01864|GCAB_MOUSE	4.90927e-13
NSYSC+57.021SVVHEGLHNHHTTK	24	sp|P01865|GCAM_MOUSE	8.68085e-27
C+57.021KVNNKDLPAPIER	17	sp|P01865|GCAM_MOUSE	5.59147e-17
TTAPSVYPLAPVC+57.021GDTTGSSVTLGC+57.021LVK	12	sp|P01865|GCAM_MOUSE	5.96072e-30
VVSALPIQHQDWMSGKEFK	12	sp|P01865|GCAM_MOUSE	2.00722e-25
APQVYVLPPPEEEMTKK	6	sp|P01865|GCAM_MOUSE	4.88873e-18
NTEPVLDSDGSYFMYSK	5	sp|P01865|GCAM_MOUSE	3.95973e-22
VNNKDLPAPIER	5	sp|P01865|GCAM_MOUSE	1.11464e-14
APQVYVLPPPEEEMTK	4	sp|P01865|GCAM_MOUSE	3.30904e-17
GPTIKPC+57.021PPC+57.021K	4	sp|P01865|GCAM_MOUSE	1.30237e-15
VVSALPIQHQDWMSGK	3	sp|P01865|GCAM_MOUSE	2.10274e-21
C+57.021PAPNLLGGPSVFIFPPK	2	sp|P01865|GCAM_MOUSE	2.9809e-20
DLPAPIER	2	sp|P01865|GCAM_MOUSE	1.24918e-10
GPTIKPC+57.021PPC+57.021KC+57.021PAPNLLGGPSVFIFPPK	2	sp|P01865|GCAM_MOUSE	2.51339e-20
GSVRAPQVYVLPPPEEEMTK	2	sp|P01865|GCAM_MOUSE	2.71656e-13
GSVRAPQVYVLPPPEEEMTKK	2	sp|P01865|GCAM_MOUSE	1.64762e-19
TELNYKNTEPVLDSDGSYFMYSK	2	sp|P01865|GCAM_MOUSE	1.11214e-18
C+57.021KVNNKDLPSPIER	6	sp|P01867|IGG2B_MOUSE	6.77509e-18
APQVYILPPPAEQLSR	5	sp|P01867|IGG2B_MOUSE	1.30581e-14
TTPPSVYPLAPGC+57.021GDTTGSSVTLGC+57.021LVK	3	sp|P01867|IGG2B_MOUSE	1.58489e-26
GLVRAPQVYILPPPAEQLSR	2	sp|P01867|IGG2B_MOUSE	1.07919e-11
HEGLKNYYLK	2	sp|P01867|IGG2B_MOUSE	4.15813e-12
TSKWEKTDSFSC+57.021NVR	2	sp|P01867|IGG2B_MOUSE	7.04658e-20
VNNKDLPSPIER	2	sp|P01867|IGG2B_MOUSE	2.55183e-12
APQVYILPPPAEQLSRK	1	sp|P01867|IGG2B_MOUSE	1.4891e-11
HEGLKNYYLKK	1	sp|P01867|IGG2B_MOUSE	8.76894e-14
TDSFSC+57.021NVR	1	sp|P01867|IGG2B_MOUSE	2.0654e-13
TDSFSC+57.021NVRHEGLK	1	sp|P01867|IGG2B_MOUSE	1.97268e-19
TDSFSC+57.021NVRHEGLKNYYLKK	1	sp|P01867|IGG2B_MOUSE	8.45451e-12
WEKTDSFSC+57.021NVR	1	sp|P01867|IGG2B_MOUSE	1.46885e-15
APQVYTIPPPKEQMAK	7	sp|P01869|IGH1M_MOUSE	8.21123e-20
VNSAAFPAPIEK	6	sp|P01869|IGH1M_MOUSE	5.71814e-16
TTPPSVYPLAPGSAAQTNSMVTLGC+57.021LVK	5	sp|P01869|IGH1M_MOUSE	2.29934e-20
DVLTITLTPK	4	sp|P01869|IGH1M_MOUSE	3.89655e-12
DC+57.021GC+57.021KPC+57.021IC+57.021TVPEVSSVFIFPPKPK	3	sp|P01869|IGH1M_MOUSE	7.20946e-25
SNWEAGNTFTC+57.021SVLHEGLHNHHTEK	3	sp|P01869|IGH1M_MOUSE	2.18448e-29
C+57.021RVNSAAFPAPIEK	2	sp|P01869|IGH1M_MOUSE	4.99004e-16
SVSELPIMHQDWLNGKEFK	2	sp|P01869|IGH1M_MOUSE	2.9664e-22
APQVYTIPPPKEQMAKDK	1	sp|P01869|IGH1M_MOUSE	1.26506e-20
GRPKAPQVYTIPPPKEQMAK	1	sp|P01869|IGH1M_MOUSE	2.60269e-14
GRPKAPQVYTIPPPKEQMAKDK	1	sp|P01869|IGH1M_MOUSE	4.84428e-14
SILEGSDEYLVC+57.021K	3	sp|P01872|IGHM_MOUSE	2.56643e-16
YLATSQVLLSPK	3	sp|P01872|IGHM_MOUSE	3.21297e-15
LVESGFTTDPVTIENK	2	sp|P01872|IGHM_MOUSE	4.8186e-19
DGKLVESGFTTDPVTIENK	1	sp|P01872|IGHM_MOUSE	4.37864e-17
DGKLVESGFTTDPVTIENKGSTPQTYK	1	sp|P01872|IGHM_MOUSE	4.41781e-17
EFVC+57.021TVTHRDLPSPQKK	1	sp|P01872|IGHM_MOUSE	1.44186e-13
EQLNLRESATVTC+57.021LVK	1	sp|P01872|IGHM_MOUSE	5.80746e-20
ESATVTC+57.021LVK	1	sp|P01872|IGHM_MOUSE	1.98528e-13
GVASVC+57.021VEDWNNRK	1	sp|P01872|IGHM_MOUSE	1.62914e-17
HPPAVYLLPPAR	1	sp|P01872|IGHM_MOUSE	1.97169e-10
LVESGFTTDPVTIENKGSTPQTYK	1	sp|P01872|IGHM_MOUSE	5.97748e-21
TGGKYLATSQVLLSPK	1	sp|P01872|IGHM_MOUSE	3.64355e-15
TPQIQVYSR	1	sp|P01887|B2MG_MOUSE	9.91944e-13
IGGHGAEYGAEALER	6	sp|P01942|HBA_MOUSE	1.18944e-15
MFASFPTTK	2	sp|P01942|HBA_MOUSE	1.90655e-13
FLASVSTVLTSK	1	sp|P01942|HBA_MOUSE	3.37145e-15
VDPVNFK	1	sp|P01942|HBA_MOUSE	9.31345e-11
YFDSFGDLSSASAIMGNAK	3	sp|P02088|HBB1_MOUSE	1.19928e-24
DFTPAAQAAFQK	1	sp|P02089|HBB2_MOUSE	6.44554e-16
LLVVYPWTQR	1	sp|P02104|HBE_MOUSE	3.5413e-14
ALEESNYELEGK	3	sp|P02535|K1C10_MOUSE	3.80412e-15
LENEIQTYR	2	sp|P02535|K1C10_MOUSE	1.63938e-12
QSLEASLAETEGR	2	sp|P02535|K1C10_MOUSE	6.18023e-16
VTMQNLNDR	2	sp|P02535|K1C10_MOUSE	2.13263e-13
DYSKYYK	1	sp|P02535|K1C10_MOUSE	1.09289e-10
IKEWYEK	1	sp|P02535|K1C10_MOUSE	8.337e-11
LAADDFRLK	1	sp|P02535|K1C10_MOUSE	7.93121e-11
QSVEADINGLR	1	sp|P02535|K1C10_MOUSE	4.00026e-14
QSVEADINGLRR	1	sp|P02535|K1C10_MOUSE	2.26215e-15
FSSSGSGTDFTLR	1	sp|P03976|KV2A5_MOUSE	3.64498e-17
AQTPQVYTIPPPR	3	sp|P03987|IGHG3_MOUSE	3.36782e-16
AQTPQVYTIPPPREQMSK	2	sp|P03987|IGHG3_MOUSE	3.1574e-18
GYFPEPVTVK	2	sp|P03987|IGHG3_MOUSE	4.36882e-14
GYFPEPVTVKWNYGALSSGVR	2	sp|P03987|IGHG3_MOUSE	8.08408e-21
VNNKALPAPIER	1	sp|P03987|IGHG3_MOUSE	1.06299e-10
VVSALPIQHQDWMR	1	sp|P03987|IGHG3_MOUSE	4.34652e-17
LALDIEIATYR	2	sp|P03995|GFAP_MOUSE	6.38701e-14
TNAENEFVTIKK	5	sp|P04104|K2C1_MOUSE	1.49083e-16
SLNDKFASFIDKVR	3	sp|P04104|K2C1_MOUSE	1.01909e-16
TNAENEFVTIK	2	sp|P04104|K2C1_MOUSE	1.75297e-14
EQIKSLNDKFASFIDKVR	1	sp|P04104|K2C1_MOUSE	1.13344e-12
WIYDTSKLASGVPAR	1	sp|P04940|KV6A6_MOUSE	8.94766e-16
LLIYDTSNLASGVPVR	2	sp|P04945|KV6AB_MOUSE	4.34168e-18
LLIYYTSR	1	sp|P04946|KV5AM_MOUSE	5.89247e-11
IGADFLGR	1	sp|P05201|AATC_MOUSE	9.63462e-11
FVTVQTISGTGALR	1	sp|P05202|AATM_MOUSE	1.47472e-14
VGASFLQR	1	sp|P05202|AATM_MOUSE	7.18532e-11
GNYDAAQRGPGGVWAAEK	1	sp|P05367|SAA2_MOUSE	7.14415e-15
AQIFANSVDNAR	1	sp|P05784|K1C18_MOUSE	1.57593e-15
QSVESDIHGLRK	1	sp|P05784|K1C18_MOUSE	1.1911e-10
VRPASSAASVYAGAGGSGSR	1	sp|P05784|K1C18_MOUSE	1.02628e-16
NRVIGSGC+57.021NLDSAR	1	sp|P06151|LDHA_MOUSE	1.0352e-12
VTLTPEEEAR	1	sp|P06151|LDHA_MOUSE	2.59323e-13
SLTSEDSAVYYC+57.021AR	6	sp|P06330|HVM51_MOUSE	1.59653e-18
ATLTVDKSSSATYMELR	5	sp|P06330|HVM51_MOUSE	1.17228e-19
ASGYTFTDYYMNWVK	2	sp|P06330|HVM51_MOUSE	3.98636e-19
SSSATYMELR	2	sp|P06330|HVM51_MOUSE	5.59056e-12
NLAPLVEDVQSK	1	sp|P06728|APOA4_MOUSE	8.27441e-15
TVEPMGEMFNK	1	sp|P06728|APOA4_MOUSE	6.39112e-12
YMC+57.021ENQATISSK	2	sp|P07724|ALBU_MOUSE	5.25081e-14
YNDLGEQHFK	2	sp|P07724|ALBU_MOUSE	8.6357e-15
AADKDTC+57.021FSTEGPNLVTR	1	sp|P07724|ALBU_MOUSE	2.85435e-17
LGEYGFQNAILVR	1	sp|P07724|ALBU_MOUSE	2.68562e-15
LSQTFPNADFAEITK	1	sp|P07724|ALBU_MOUSE	3.30001e-14
LVQEVTDFAK	1	sp|P07724|ALBU_MOUSE	2.43638e-13
QTALAELVK	1	sp|P07724|ALBU_MOUSE	4.70502e-11
RHPDYSVSLLLR	1	sp|P07724|ALBU_MOUSE	3.2197e-12
TNC+57.021DLYEKLGEYGFQNAILVR	1	sp|P07724|ALBU_MOUSE	2.09688e-15
GVVDSDDLPLNVSR	1	sp|P08113|ENPL_MOUSE	1.37729e-11
TANLGAGAAQPLRDR	2	sp|P08226|APOE_MOUSE	9.40264e-14
ELEEQLGPVAEETR	1	sp|P08226|APOE_MOUSE	8.0286e-17
LGADMEDLRNR	1	sp|P08226|APOE_MOUSE	2.39314e-12
LGPLVEQGR	1	sp|P08226|APOE_MOUSE	7.16418e-12
ANTFVAELK	1	sp|P08249|MDHM_MOUSE	9.93208e-12
ITLVTYEC+57.021DKGYR	1	sp|P08607|C4BPA_MOUSE	1.03328e-13
LGDVYVNDAFGTAHR	1	sp|P09041|PGK2_MOUSE	2.1005e-17
VDATEESDLAQQYGVR	1	sp|P09103|PDIA1_MOUSE	4.85831e-15
TIRLELQGSNSR	1	sp|P09405|NUCL_MOUSE	3.27902e-15
VFDKEGNGTVMGAELR	2	sp|P09542|MYL3_MOUSE	1.49583e-15
TIEKFEKEAAEMGK	3	sp|P10126|EF1A1_MOUSE	1.50725e-18
IGGIGTVPVGR	2	sp|P10126|EF1A1_MOUSE	2.80497e-14
QLIVGVNK	1	sp|P10126|EF1A1_MOUSE	1.33948e-10
THINIVVIGHVDSGK	1	sp|P10126|EF1A1_MOUSE	3.36179e-17
YYVTIIDAPGHR	1	sp|P10126|EF1A1_MOUSE	3.16759e-12
SGVYKHEAGDMMGGHAIR	1	sp|P10605|CATB_MOUSE	1.40367e-17
ITQSNAILR	2	sp|P10649|GSTM1_MOUSE	1.02416e-11
ADIVENQVMDTR	1	sp|P10649|GSTM1_MOUSE	1.14152e-14
LYSEFLGK	1	sp|P10649|GSTM1_MOUSE	4.83042e-11
YIATPIFSK	1	sp|P10649|GSTM1_MOUSE	2.45476e-12
STTPDITGYR	1	sp|P11276|FINC_MOUSE	1.38307e-12
TYLGNALVC+57.021TC+57.021YGGSR	1	sp|P11276|FINC_MOUSE	1.11099e-14
WC+57.021HDNGVNYK	1	sp|P11276|FINC_MOUSE	1.57694e-11
FLVGPDGVPVRR	1	sp|P11352|GPX1_MOUSE	4.01429e-13
NALPTPSDDPTALMTDPK	1	sp|P11352|GPX1_MOUSE	2.91529e-14
ADLINNLGTIAK	1	sp|P11499|HS90B_MOUSE	7.83466e-12
GVVDSEDLPLNISR	1	sp|P11499|HS90B_MOUSE	1.6247e-13
SLNNKFASFIDKVR	3	sp|P11679|K2C8_MOUSE	3.28761e-17
AQYEDIANR	1	sp|P11679|K2C8_MOUSE	3.07652e-12
DGKLVSESSDVVSK	1	sp|P11679|K2C8_MOUSE	2.30774e-12
SLVFPEAENR	1	sp|P11725|OTC_MOUSE	3.73317e-12
VYKQSDLDTLAK	1	sp|P11725|OTC_MOUSE	1.14487e-14
GKDIKGVSEIVHEGKK	1	sp|P12710|FABPL_MOUSE	5.89765e-11
IKLTITYGPK	1	sp|P12710|FABPL_MOUSE	2.32956e-12
LTITYGPK	1	sp|P12710|FABPL_MOUSE	4.03228e-11
LNDFASAVR	1	sp|P12787|COX5A_MOUSE	1.43156e-12
AAGKGDVPTKRPPVLR	1	sp|P12970|RL7A_MOUSE	6.07694e-13
AGVNTVTTLVENKK	1	sp|P12970|RL7A_MOUSE	3.70908e-16
RHWGGNVLGPK	1	sp|P12970|RL7A_MOUSE	6.81032e-12
TNYNDRYDEIR	1	sp|P12970|RL7A_MOUSE	1.46339e-14
TNYNDRYDEIRR	1	sp|P12970|RL7A_MOUSE	2.46041e-14
VLKSHGQDYLVGNR	1	sp|P13745|GSTA1_MOUSE	2.11521e-14
GNLC+57.021VNLVR	1	sp|P14106|C1QB_MOUSE	1.70175e-12
VITNANENYEPR	1	sp|P14106|C1QB_MOUSE	1.02307e-11
TGVAPIIDVVR	1	sp|P14115|RL27A_MOUSE	1.19564e-11
EIKDILIQYDR	1	sp|P14131|RS16_MOUSE	2.70186e-12
GPLQSVQVFGR	1	sp|P14131|RS16_MOUSE	8.40663e-11
LLEPVLLLGK	1	sp|P14131|RS16_MOUSE	9.57802e-12
TTHFVEGGDAGNREDQINR	2	sp|P14148|RL7_MOUSE	2.0873e-15
IALTDNSLIAR	1	sp|P14148|RL7_MOUSE	1.0274e-13
LGVTADDVK	1	sp|P14152|MDHC_MOUSE	1.96051e-11
FAAATGATPIAGR	1	sp|P14206|RSSA_MOUSE	4.02119e-17
AC+57.021LYAGVK	1	sp|P15105|GLNA_MOUSE	1.6432e-10
AYDPKGGLDNAR	1	sp|P15105|GLNA_MOUSE	1.59353e-10
RPSANC+57.021DPYAVTEAIVR	1	sp|P15105|GLNA_MOUSE	1.39065e-12
MPEFYNR	2	sp|P16460|ASSY_MOUSE	2.07026e-11
GVPVKVTNIKDGTTR	1	sp|P16460|ASSY_MOUSE	3.15481e-16
NDLMEYAK	1	sp|P16460|ASSY_MOUSE	3.78054e-11
QHGIPIPVTPK	1	sp|P16460|ASSY_MOUSE	3.78393e-12
TQDPAKAPNSPDVLEIEFK	1	sp|P16460|ASSY_MOUSE	1.17974e-13
TQDPAKAPNSPDVLEIEFKK	1	sp|P16460|ASSY_MOUSE	1.67285e-17
TTSLELFMYLNEVAGK	1	sp|P16460|ASSY_MOUSE	2.48302e-19
VQVSVFK	1	sp|P16460|ASSY_MOUSE	2.14261e-10
IVSNASC+57.021TTNC+57.021LAPLAK	3	sp|P16858|G3P_MOUSE	1.48093e-19
GAAQNIIPASTGAAK	2	sp|P16858|G3P_MOUSE	2.90041e-16
LISWYDNEYGYSNR	2	sp|P16858|G3P_MOUSE	8.04763e-17
DGRGAAQNIIPASTGAAK	1	sp|P16858|G3P_MOUSE	2.94208e-12
TVDGPSGKLWR	1	sp|P16858|G3P_MOUSE	5.53069e-15
VGVNGFGR	1	sp|P16858|G3P_MOUSE	8.52733e-11
VIHDNFGIVEGLMTTVHAITATQK	1	sp|P16858|G3P_MOUSE	4.58745e-20
IINEPTAAAIAYGLDKK	3	sp|P17156|HSP72_MOUSE	2.53592e-21
STAGDTHLGGEDFDNR	3	sp|P17156|HSP72_MOUSE	1.16548e-21
GNPTVEVDLYTAK	1	sp|P17182|ENOA_MOUSE	6.06844e-15
VNQIGSVTESLQAC+57.021K	1	sp|P17182|ENOA_MOUSE	1.8108e-13
GAAVALNIR	1	sp|P17717|UDB17_MOUSE	1.55962e-10
ALSTGEKGFGYK	1	sp|P17742|PPIA_MOUSE	1.17681e-12
IIYGGSVTGATC+57.021K	1	sp|P17751|TPIS_MOUSE	3.01803e-17
LDEREAGITEK	1	sp|P17751|TPIS_MOUSE	6.11204e-11
TTPSYVAFTDTER	4	sp|P17879|HS71B_MOUSE	2.63945e-17
ATAGDTHLGGEDFDNR	1	sp|P17879|HS71B_MOUSE	1.23959e-10
LVESGGGLVQPGGSLK	1	sp|P18525|HVM54_MOUSE	3.06954e-13
SEDTAMYYC+57.021AR	1	sp|P18525|HVM54_MOUSE	4.65808e-16
GRFTISRDNAR	1	sp|P18527|HVM56_MOUSE	2.0515e-10
EVQLVESGGGLVKPGGSLK	2	sp|P18528|HVM57_MOUSE	1.17809e-13
DTSKNQFFLK	3	sp|P18531|HVM60_MOUSE	4.81763e-12
LNSVTTEDTATYYC+57.021AR	2	sp|P18531|HVM60_MOUSE	2.00902e-18
YALYDATYETK	1	sp|P18760|COF1_MOUSE	8.29417e-16
LKEDTQVADVTTSR	1	sp|P19096|FAS_MOUSE	1.25161e-11
VTAIYIDPATHR	1	sp|P19096|FAS_MOUSE	2.2164e-12
EAAQMDMVNDGVEDLR	2	sp|P19157|GSTP1_MOUSE	1.70962e-11
EAAQMDMVNDGVEDLRGK	2	sp|P19157|GSTP1_MOUSE	3.60807e-22
YVTLIYTNYENGK	1	sp|P19157|GSTP1_MOUSE	5.16487e-18
YVTLIYTNYENGKNDYVK	1	sp|P19157|GSTP1_MOUSE	3.81007e-19
YQAVTATLEEK	2	sp|P19253|RL13A_MOUSE	2.7237e-13
LLLEYTDSSYEEKR	1	sp|P19639|GSTM4_MOUSE	8.34305e-14
NQLTSNPENTVFDAK	3	sp|P20029|GRP78_MOUSE	1.23261e-15
DAGTIAGLNVMR	1	sp|P20029|GRP78_MOUSE	8.96577e-12
ELEEIVQPIISK	1	sp|P20029|GRP78_MOUSE	2.10512e-14
IINEPTAAAIAYGLDK	1	sp|P20029|GRP78_MOUSE	8.70415e-15
IINEPTAAAIAYGLDKR	1	sp|P20029|GRP78_MOUSE	4.8813e-21
ITPSYVAFTPEGER	1	sp|P20029|GRP78_MOUSE	4.53677e-16
LYGSGGPPPTGEEDTSEKDEL	1	sp|P20029|GRP78_MOUSE	7.20099e-15
NQLTSNPENTVFDAKR	1	sp|P20029|GRP78_MOUSE	2.84771e-20
SQIFSTASDNQPTVTIK	1	sp|P20029|GRP78_MOUSE	1.22414e-17
TFAPEEISAMVLTK	1	sp|P20029|GRP78_MOUSE	3.09455e-17
TKPYIQVDIGGGQTK	1	sp|P20029|GRP78_MOUSE	1.38889e-13
TWNDPSVQQDIK	1	sp|P20029|GRP78_MOUSE	7.70184e-12
VEIIANDQGNR	1	sp|P20029|GRP78_MOUSE	7.69718e-15
VTAEDKGTGNKNKITITNDQNR	1	sp|P20029|GRP78_MOUSE	1.91e-12
SLYSSSPGGAYVTR	1	sp|P20152|VIME_MOUSE	3.17917e-14
EQQC+57.021VIMAENSK	1	sp|P20918|PLMN_MOUSE	1.68695e-10
HIAEEADRKYEEVAR	2	sp|P21107|TPM3_MOUSE	4.36605e-19
TIDDLEDKLK	1	sp|P21107-2|TPM3_MOUSE	1.71502e-10
VNQIGSVTESIQAC+57.021K	1	sp|P21550|ENOB_MOUSE	1.8108e-13
VC+57.021SQYAAYGKEK	1	sp|P21614|VTDB_MOUSE	6.39679e-11
ANHLNKLAEKEETGVAMR	1	sp|P21981|TGM2_MOUSE	2.3988e-13
DLYLENPEIK	1	sp|P21981|TGM2_MOUSE	1.11988e-11
SEGTYC+57.021C+57.021GPVSVR	1	sp|P21981|TGM2_MOUSE	6.72553e-16
SSPIYVGR	1	sp|P21981|TGM2_MOUSE	4.28523e-11
YSGC+57.021LTESNLIK	1	sp|P21981|TGM2_MOUSE	6.83145e-16
ALDVGSGSGILTAC+57.021FAR	4	sp|P23506|PIMT_MOUSE	9.8876e-21
SGGASHSELIHNLRK	2	sp|P23506|PIMT_MOUSE	9.41384e-19
LILPVGPAGGNQMLEQYDKLQDGSVK	1	sp|P23506|PIMT_MOUSE	1.97037e-21
MGYAEEAPYDAIHVGAAAPVVPQALIDQLKPGGR	1	sp|P23506|PIMT_MOUSE	4.04808e-30
FNSANEDNVTQVR	1	sp|P24270|CATA_MOUSE	2.73076e-13
LAQEDPDYGLR	1	sp|P24270|CATA_MOUSE	2.57528e-11
NFTDVHPDYGAR	1	sp|P24270|CATA_MOUSE	1.34027e-12
SALEHSVQC+57.021AVDVKR	1	sp|P24270|CATA_MOUSE	5.11875e-11
VLEGMDVVR	1	sp|P24369|PPIB_MOUSE	4.32784e-11
FKSVDDVIKR	1	sp|P24549|AL1A1_MOUSE	7.9514e-12
GC+57.021TATLGNFAK	1	sp|P25444|RS2_MOUSE	2.51091e-14
GTGIVSAPVPK	1	sp|P25444|RS2_MOUSE	6.18291e-12
DRC+57.021FATQVYC+57.021K	1	sp|P25688|URIC_MOUSE	2.23538e-11
FAGPYDKGEYSPSVQK	1	sp|P25688|URIC_MOUSE	7.74839e-22
MGLINKEEVLLPLDNPYGK	1	sp|P25688|URIC_MOUSE	2.16642e-13
NGPPVIHSGIKDLK	1	sp|P25688|URIC_MOUSE	9.25126e-15
ELFTTPVLR	1	sp|P26151|FCGR1_MOUSE	1.66693e-10
HGGTIPVVPTAEFQDR	2	sp|P26443|DHE3_MOUSE	1.83501e-14
C+57.021AVVDVPFGGAK	1	sp|P26443|DHE3_MOUSE	6.29917e-15
DDGSWEVIEGYR	1	sp|P26443|DHE3_MOUSE	2.02999e-13
IIAEGANGPTTPEADKIFLER	1	sp|P26443|DHE3_MOUSE	5.25099e-12
LTFKYER	1	sp|P26443|DHE3_MOUSE	1.96641e-10
YSTDVSVDEVK	1	sp|P26443|DHE3_MOUSE	2.59213e-15
ATSPSTLVSTGPSSR	1	sp|P27546|MAP4_MOUSE	4.66567e-12
HGSLGFLPR	1	sp|P27659|RL3_MOUSE	2.62596e-12
DGEEAGAYDGPR	1	sp|P27773|PDIA3_MOUSE	5.72904e-13
IFRDGEEAGAYDGPR	1	sp|P27773|PDIA3_MOUSE	2.66511e-14
LAPEYEAAATR	1	sp|P27773|PDIA3_MOUSE	3.00797e-14
MDATANDVPSPYEVK	1	sp|P27773|PDIA3_MOUSE	2.65396e-12
FSTSQSLPASQTR	1	sp|P28665|MUG1_MOUSE	2.11124e-11
FGPALSVK	1	sp|P29341|PABP1_MOUSE	4.76499e-11
NLDDGIDDER	1	sp|P29341|PABP1_MOUSE	2.11993e-12
SLGYAYVNFQQPADAER	1	sp|P29341|PABP1_MOUSE	6.78903e-15
GQYC+57.021YELDETAVRPGYPK	1	sp|P29788|VTNC_MOUSE	3.29698e-16
SSDGAREPQFISR	1	sp|P29788|VTNC_MOUSE	3.36255e-12
AILNYIASK	1	sp|P30115|GSTA3_MOUSE	2.21326e-11
MGFPEAASSFR	1	sp|P32020|NLTP_MOUSE	1.85902e-12
THQVSAAPTSSAGDGFK	1	sp|P32020|NLTP_MOUSE	2.53974e-13
VVGYDMSKEAAR	1	sp|P32020|NLTP_MOUSE	5.05558e-11
SEEALALPR	1	sp|P34914|HYES_MOUSE	4.9527e-11
AHGFTFTR	1	sp|P35486|ODPA_MOUSE	9.06585e-12
EATKFAAAYC+57.021R	1	sp|P35486|ODPA_MOUSE	5.15129e-11
SKSDPIMLLKDR	1	sp|P35486|ODPA_MOUSE	2.88496e-13
ASLQNLLSASQAR	1	sp|P35505|FAAA_MOUSE	8.68067e-13
LVQAFQFTDK	2	sp|P35700|PRDX1_MOUSE	9.14911e-14
QITINDLPVGR	2	sp|P35700|PRDX1_MOUSE	4.51955e-14
ADEGISFR	1	sp|P35700|PRDX1_MOUSE	4.39005e-11
ATAVMPDGQFK	1	sp|P35700|PRDX1_MOUSE	3.05342e-15
ATAVMPDGQFKDISLSEYK	1	sp|P35700|PRDX1_MOUSE	1.28205e-17
GLFIIDDKGILR	1	sp|P35700|PRDX1_MOUSE	2.23355e-14
TIAQDYGVLK	1	sp|P35700|PRDX1_MOUSE	1.20797e-13
TIAQDYGVLKADEGISFR	1	sp|P35700|PRDX1_MOUSE	4.09131e-16
C+57.021TGGEVGATSALAPK	2	sp|P35979|RL12_MOUSE	3.66934e-16
QAQIEVVPSASALIIK	2	sp|P35979|RL12_MOUSE	8.31519e-12
IGPLGLSPK	1	sp|P35979|RL12_MOUSE	7.54388e-11
GTVLLSGPR	1	sp|P35980|RL18_MOUSE	5.12013e-11
SDEDYLYREELAR	1	sp|P37040|NCPR_MOUSE	6.60884e-16
GFEEAVAAGAK	1	sp|P38060|HMGCL_MOUSE	1.40109e-14
GYVSC+57.021ALGC+57.021PYEGK	1	sp|P38060|HMGCL_MOUSE	3.98121e-18
KNANC+57.021SIEESFQR	1	sp|P38060|HMGCL_MOUSE	9.96215e-11
LIDMLSEAGLPVIEATSFVSPK	1	sp|P38060|HMGCL_MOUSE	1.82882e-12
NANC+57.021SIEESFQR	1	sp|P38060|HMGCL_MOUSE	9.61286e-14
ALLAGKDSETGENIR	3	sp|P38647|GRP75_MOUSE	2.81019e-18
ASNGDAWVEAHGK	3	sp|P38647|GRP75_MOUSE	8.06091e-15
QAVTNPNNTFYATKR	3	sp|P38647|GRP75_MOUSE	3.7812e-18
STNGDTFLGGEDFDQALLR	3	sp|P38647|GRP75_MOUSE	2.33127e-19
DAGQISGLNVLR	2	sp|P38647|GRP75_MOUSE	5.16069e-14
NAVITVPAYFNDSQR	2	sp|P38647|GRP75_MOUSE	2.31836e-18
QAVTNPNNTFYATK	2	sp|P38647|GRP75_MOUSE	1.08183e-11
TTPSVVAFTADGER	2	sp|P38647|GRP75_MOUSE	1.90278e-18
AQFEGIVTDLIKR	1	sp|P38647|GRP75_MOUSE	4.27816e-16
MKETAENYLGHTAK	1	sp|P38647|GRP75_MOUSE	2.32518e-19
NVPFKIVR	1	sp|P38647|GRP75_MOUSE	8.18795e-11
VQQTVQDLFGR	1	sp|P38647|GRP75_MOUSE	1.02431e-14
ISSDLDGHPVPK	1	sp|P40142|TKT_MOUSE	2.5418e-12
LAVSQVPR	1	sp|P40142|TKT_MOUSE	6.09518e-11
NC+57.021SSFLIK	1	sp|P41105|RL28_MOUSE	5.21844e-11
TVGVEPAADGKGVVVVMKR	1	sp|P41105|RL28_MOUSE	1.34628e-14
ALC+57.021SEFQGSVATPR	1	sp|P41317|MBL2_MOUSE	8.92871e-11
ALAENSGVKANEVISK	1	sp|P42932|TCPQ_MOUSE	3.84032e-13
FAEAFEAIPR	1	sp|P42932|TCPQ_MOUSE	3.87557e-13
TSGPPVSELITK	2	sp|P43274|H14_MOUSE	3.04096e-15
RKTSGPPVSELITK	1	sp|P43274|H14_MOUSE	2.67351e-12
ALAAGGYDVEKNNSR	1	sp|P43276|H15_MOUSE	1.72509e-10
ALAAAGYDVEKNNSR	3	sp|P43277|H13_MOUSE	1.47083e-19
ALAAAGYDVEK	1	sp|P43277|H13_MOUSE	8.77326e-14
ASGPPVSELITK	1	sp|P43277|H13_MOUSE	9.50704e-12
RKASGPPVSELITK	1	sp|P43277|H13_MOUSE	5.62053e-11
SLVSKGTLVQTK	1	sp|P43277|H13_MOUSE	8.67097e-14
NAASFKEVSDGVLTSSK	1	sp|P43883|PLIN2_MOUSE	1.89195e-15
SIGYDDTDESHC+57.021VEHIESR	1	sp|P43883|PLIN2_MOUSE	2.04515e-19
TRPTVAAGAVGLAQR	1	sp|P45952|ACADM_MOUSE	1.33222e-12
ALPGHLKPFETLLSQNQGGK	2	sp|P46425|GSTP2_MOUSE	4.52426e-12
FEDGDLTLYQSNAILR	2	sp|P46425|GSTP2_MOUSE	1.33579e-19
LVEDMENKIR	1	sp|P47757|CAPZB_MOUSE	6.29668e-12
AVDLQILPK	1	sp|P47911|RL6_MOUSE	1.61829e-10
HQEGEIFDTEKEKYEITEQR	1	sp|P47911|RL6_MOUSE	2.75624e-15
AGAKAPAKAQASAPAQAPK	2	sp|P47915|RL29_MOUSE	1.15089e-10
LAFIAHPK	2	sp|P47915|RL29_MOUSE	3.60722e-11
AQASAPAQAPKGAQAPK	1	sp|P47915|RL29_MOUSE	1.48659e-17
AAGVSVEPFWPGLFAK	1	sp|P47955|RLA1_MOUSE	3.1246e-18
NKSTESLQANVQR	2	sp|P47963|RL13_MOUSE	5.14019e-12
VITEEEKNFK	2	sp|P47963|RL13_MOUSE	8.00164e-14
ARVITEEEKNFK	1	sp|P47963|RL13_MOUSE	4.55818e-12
IAPRPASGPIRPIVR	1	sp|P47963|RL13_MOUSE	5.55941e-18
VDTWFNQPAR	1	sp|P47963|RL13_MOUSE	3.28463e-15
EVC+57.021GFAPYER	1	sp|P47964|RL36_MOUSE	2.77631e-11
SSGPYGGGGQYFAKPR	1	sp|P49312|ROA1_MOUSE	1.60591e-17
SLDLDSIIAEVK	5	sp|P50446|K2C6A_MOUSE	4.75036e-14
FLEQQNKVLDTK	1	sp|P50446|K2C6A_MOUSE	2.03916e-11
YEELQVTAGR	1	sp|P50446|K2C6A_MOUSE	8.82817e-14
SFGGVTHGLPEKK	1	sp|P50544|ACADV_MOUSE	1.71908e-12
HVLQQFADNDVSR	5	sp|P51660|DHB4_MOUSE	1.74513e-17
NNIHC+57.021NTIAPNAGSR	4	sp|P51660|DHB4_MOUSE	2.19322e-12
AAVAVPNRPPDAVLR	2	sp|P51660|DHB4_MOUSE	2.00885e-18
AVANYDSVEAGEKLVK	2	sp|P51660|DHB4_MOUSE	1.96537e-19
ILMTSSASGIYGNFGQANYSAAK	2	sp|P51660|DHB4_MOUSE	2.16583e-19
TSHAAPAATSGFVGAVGHK	2	sp|P51660|DHB4_MOUSE	1.42612e-16
VVLVTGAGGGLGR	2	sp|P51660|DHB4_MOUSE	1.22341e-16
ALHGEQYLELYKPLPR	1	sp|P51660|DHB4_MOUSE	2.81112e-16
AVANYDSVEAGEK	1	sp|P51660|DHB4_MOUSE	6.62354e-17
AYALAFAER	1	sp|P51660|DHB4_MOUSE	1.44116e-12
DATSLNQAALYR	1	sp|P51660|DHB4_MOUSE	2.00799e-15
FVYEGSADFSC+57.021LPTFGVIVAQK	1	sp|P51660|DHB4_MOUSE	1.01192e-23
GALVIVNDLGGDFKGIGK	1	sp|P51660|DHB4_MOUSE	5.25933e-12
GSSAADKVVAEIR	1	sp|P51660|DHB4_MOUSE	2.13785e-16
GSSAADKVVAEIRR	1	sp|P51660|DHB4_MOUSE	2.41792e-17
IDVVVNNAGILR	1	sp|P51660|DHB4_MOUSE	1.98362e-12
IDVVVNNAGILRDR	1	sp|P51660|DHB4_MOUSE	2.85602e-15
ISDEDWDIIHR	1	sp|P51660|DHB4_MOUSE	4.06148e-15
NQPMTPEAVR	1	sp|P51660|DHB4_MOUSE	1.07372e-11
TALDTFGR	1	sp|P51660|DHB4_MOUSE	2.08863e-11
TALDTFGRIDVVVNNAGILR	1	sp|P51660|DHB4_MOUSE	7.42679e-21
LLLQVQHASK	1	sp|P51881|ADT2_MOUSE	9.24651e-13
IIAC+57.021DGGGGALGHPK	1	sp|P52503|NDUS6_MOUSE	1.32273e-16
VYINLDKETK	1	sp|P52503|NDUS6_MOUSE	1.41912e-11
AAYQVAALPR	2	sp|P52760|UK114_MOUSE	1.0422e-13
AAGC+57.021DFNNVVK	1	sp|P52760|UK114_MOUSE	3.58011e-16
APAAIGPYSQAVQVDR	1	sp|P52760|UK114_MOUSE	6.85795e-11
TYFQGSLPAR	1	sp|P52760|UK114_MOUSE	2.96156e-13
ILGPGLNK	1	sp|P53026|RL10A_MOUSE	1.72205e-10
ASLDMFNQK	1	sp|P54869|HMCS2_MOUSE	1.9742e-12
LVSSVSDLPKR	1	sp|P54869|HMCS2_MOUSE	7.4111e-12
TAPFDSRFPNQNQTK	2	sp|P56391|CX6B1_MOUSE	4.99999e-16
GGDVSVC+57.021EWYRR	1	sp|P56391|CX6B1_MOUSE	8.43647e-14
TYIIGELHPDDRSK	1	sp|P56395|CYB5_MOUSE	3.15157e-14
AIAELGIYPAVDPLDSTSR	2	sp|P56480|ATPB_MOUSE	2.06013e-13
KGSITSVQAIYVPADDLTDPAPATTFAHLDATTVLSR	2	sp|P56480|ATPB_MOUSE	9.09233e-26
IMDPNIVGNEHYDVAR	1	sp|P56480|ATPB_MOUSE	2.47057e-21
ATAPQTQHVSPMR	1	sp|P57776|EF1D_MOUSE	1.01445e-15
ITSLEVENQNLR	1	sp|P57776|EF1D_MOUSE	3.15657e-14
LVPVGYGIR	1	sp|P57776|EF1D_MOUSE	8.92523e-12
SLAGSSGPGASSGPGGDHSELIVR	1	sp|P57776|EF1D_MOUSE	5.1445e-14
AYLPVNESFGFTADLR	1	sp|P58252|EF2_MOUSE	1.67667e-13
C+57.021LYASVLTAQPR	1	sp|P58252|EF2_MOUSE	1.36729e-11
STLTDSLVC+57.021K	1	sp|P58252|EF2_MOUSE	1.09621e-12
TGTITTFEHAHNMR	1	sp|P58252|EF2_MOUSE	8.99925e-16
VNFTVDQIR	1	sp|P58252|EF2_MOUSE	5.52472e-13
YLAEKYEWDVAEAR	1	sp|P58252|EF2_MOUSE	1.80938e-15
HIAEDADRKYEEVAR	1	sp|P58771|TPM1_MOUSE	4.24558e-16
LEEAEKAADESER	1	sp|P58774|TPM2_MOUSE	6.94743e-12
VAPEEHPVLLTEAPLNPK	6	sp|P60710|ACTB_MOUSE	9.24521e-23
AVFPSIVGRPR	5	sp|P60710|ACTB_MOUSE	6.47042e-14
TTGIVMDSGDGVTHTVPIYEGYALPHAILR	5	sp|P60710|ACTB_MOUSE	2.76981e-32
MQKEITALAPSTMK	4	sp|P60710|ACTB_MOUSE	1.72016e-17
HQGVMVGMGQKDSYVGDEAQSKR	3	sp|P60710|ACTB_MOUSE	3.97242e-21
SYELPDGQVITIGNER	3	sp|P60710|ACTB_MOUSE	1.37755e-19
GYSFTTTAER	2	sp|P60710|ACTB_MOUSE	5.1746e-14
DLYANTVLSGGTTMYPGIADR	1	sp|P60710|ACTB_MOUSE	9.04143e-18
EITALAPSTMK	1	sp|P60710|ACTB_MOUSE	2.07366e-14
GYSFTTTAEREIVR	1	sp|P60710|ACTB_MOUSE	1.27682e-17
IWHHTFYNELR	1	sp|P60710|ACTB_MOUSE	5.93373e-14
LC+57.021YVALDFEQEMATAASSSSLEK	1	sp|P60710|ACTB_MOUSE	7.74952e-21
QEYDESGPSIVHR	1	sp|P60710|ACTB_MOUSE	7.58917e-17
QEYDESGPSIVHRK	1	sp|P60710|ACTB_MOUSE	4.98003e-16
DTGKTPVEPEVAIHR	1	sp|P60867|RS20_MOUSE	5.62841e-11
LIDLHSPSEIVK	1	sp|P60867|RS20_MOUSE	4.29097e-14
SLEKVC+57.021ADLIR	1	sp|P60867|RS20_MOUSE	9.7431e-14
NIDEHANEDVER	1	sp|P61027|RAB10_MOUSE	1.15336e-12
VYNYNHLMPTR	2	sp|P61358|RL27_MOUSE	3.51614e-15
TVVNKDVFRDPALKR	1	sp|P61358|RL27_MOUSE	2.36007e-15
YSVDIPLDK	1	sp|P61358|RL27_MOUSE	2.69631e-12
YTC+57.021SFC+57.021GK	2	sp|P61514|RL37A_MOUSE	8.39439e-13
TVAGGAWTYNTTSAVTVK	1	sp|P61514|RL37A_MOUSE	3.97036e-22
NVTELNEPLSNEER	1	sp|P61982|1433G_MOUSE	2.38558e-11
YLAEVATGEKR	1	sp|P61982|1433G_MOUSE	8.13483e-15
AIIIFVPVPQLK	1	sp|P62082|RS7_MOUSE	7.53402e-14
IIDVVYNASNNELVR	1	sp|P62242|RS8_MOUSE	2.52244e-15
ISSLLEEQFQQGK	1	sp|P62242|RS8_MOUSE	6.15701e-16
LTPEEEEILNK	1	sp|P62242|RS8_MOUSE	1.92142e-13
LTPEEEEILNKKR	1	sp|P62242|RS8_MOUSE	1.31424e-14
IVVNLTGR	1	sp|P62245|RS15A_MOUSE	5.95527e-11
IEDVTPIPSDSTR	2	sp|P62264|RS14_MOUSE	1.08388e-10
IGRIEDVTPIPSDSTRR	1	sp|P62264|RS14_MOUSE	4.54225e-11
TPGPGAQSALR	1	sp|P62264|RS14_MOUSE	8.80341e-13
KGHAVGDIPGVR	1	sp|P62267|RS23_MOUSE	3.43942e-11
AGELTEDEVER	2	sp|P62270|RS18_MOUSE	3.00905e-11
VLNTNIDGR	2	sp|P62270|RS18_MOUSE	1.71269e-12
VITIMQNPR	1	sp|P62270|RS18_MOUSE	2.69499e-12
AYQKQPTIFQNK	1	sp|P62281|RS11_MOUSE	3.28129e-13
DYLHYIR	1	sp|P62281|RS11_MOUSE	1.12999e-10
EAIEGTYIDK	1	sp|P62281|RS11_MOUSE	4.70413e-12
EAIEGTYIDKK	1	sp|P62281|RS11_MOUSE	6.96446e-13
FNVLKVTK	1	sp|P62281|RS11_MOUSE	1.32087e-11
TPKEAIEGTYIDKK	1	sp|P62281|RS11_MOUSE	2.8713e-12
VLLGETGKEKLPR	1	sp|P62281|RS11_MOUSE	6.37562e-16
GLSQSALPYRR	1	sp|P62301|RS13_MOUSE	2.59989e-11
NNTQVLINC+57.021R	1	sp|P62317|SMD2_MOUSE	1.1139e-13
GIPHLVTHDAR	1	sp|P62702|RS4X_MOUSE	1.12242e-14
LSNIFVIGK	1	sp|P62702|RS4X_MOUSE	8.27168e-12
YALTGDEVK	1	sp|P62702|RS4X_MOUSE	4.23431e-11
DLTTAGAVTQC+57.021YR	1	sp|P62717|RL18A_MOUSE	3.8295e-11
LYDIDVAK	1	sp|P62751|RL23A_MOUSE	3.51713e-11
VNTLIRPDGEK	1	sp|P62751|RL23A_MOUSE	3.16992e-11
DIPGLTDTTVPR	1	sp|P62754|RS6_MOUSE	3.38447e-12
GC+57.021IVDANLSVLNLVIVK	1	sp|P62754|RS6_MOUSE	3.87144e-16
LIEVDDER	1	sp|P62754|RS6_MOUSE	9.82767e-11
LIEVDDERKLR	1	sp|P62754|RS6_MOUSE	4.04223e-11
DNIQGITKPAIR	1	sp|P62806|H4_MOUSE	6.4839e-13
TTPDVIFVFGFR	1	sp|P62849|RS24_MOUSE	6.00273e-14
LHYC+57.021VSC+57.021AIHSK	1	sp|P62855|RS26_MOUSE	2.22322e-11
VEFMDDTSR	1	sp|P62858|RS28_MOUSE	2.38787e-13
LVILANNC+57.021PALR	1	sp|P62889|RL30_MOUSE	1.11775e-14
SGKYVLGYK	1	sp|P62889|RL30_MOUSE	1.37608e-10
TGVHHYSGNNIELGTAC+57.021GK	1	sp|P62889|RL30_MOUSE	1.24544e-11
VC+57.021TLAIIDPGDSDIIR	1	sp|P62889|RL30_MOUSE	9.55246e-12
KRNEDEDSPNKLYTLVTYVPVTTFK	3	sp|P62900|RL31_MOUSE	9.80439e-16
EYTINIHKR	1	sp|P62900|RL31_MOUSE	1.36624e-12
FAMKEMGTPDVR	1	sp|P62900|RL31_MOUSE	2.64946e-13
SAINEVVTR	1	sp|P62900|RL31_MOUSE	2.75959e-12
AC+57.021YGVLR	1	sp|P62908|RS3_MOUSE	1.41933e-10
ELAEDGYSGVEVR	1	sp|P62908|RS3_MOUSE	5.43171e-17
GLC+57.021AIAQAESLR	1	sp|P62908|RS3_MOUSE	5.97726e-14
SYC+57.021AEIAHNVSSK	2	sp|P62911|RL32_MOUSE	7.98367e-17
ASGNYATVISHNPETK	1	sp|P62918|RL8_MOUSE	9.31095e-15
ASGNYATVISHNPETKK	1	sp|P62918|RL8_MOUSE	5.10462e-15
AVVGVVAGGGRIDKPILK	1	sp|P62918|RL8_MOUSE	2.49272e-13
C+57.021C+57.021LTYC+57.021FNKPEDK	1	sp|P62983|RS27A_MOUSE	2.49077e-14
YYKVDENGKISR	1	sp|P62983|RS27A_MOUSE	4.76693e-14
IQDKEGIPPDQQR	5	sp|P62984|RL40_MOUSE	1.79505e-11
TITLEVEPSDTIENVK	1	sp|P62984|RL40_MOUSE	3.08814e-12
TVTNAVVTVPAYFNDSQR	9	sp|P63017|HSP7C_MOUSE	6.05566e-20
SQIHDIVLVGGSTR	4	sp|P63017|HSP7C_MOUSE	3.37026e-14
MKEIAEAYLGK	3	sp|P63017|HSP7C_MOUSE	3.23175e-14
DAGTIAGLNVLR	2	sp|P63017|HSP7C_MOUSE	2.41257e-14
LDKSQIHDIVLVGGSTR	2	sp|P63017|HSP7C_MOUSE	4.99244e-13
NQVAMNPTNTVFDAKR	2	sp|P63017|HSP7C_MOUSE	4.77356e-22
QATKDAGTIAGLNVLR	2	sp|P63017|HSP7C_MOUSE	2.15475e-13
SFYPEEVSSMVLTK	2	sp|P63017|HSP7C_MOUSE	3.14079e-18
DAKLDKSQIHDIVLVGGSTR	1	sp|P63017|HSP7C_MOUSE	3.9507e-13
DKVSSKNSLESYAFNMK	1	sp|P63017|HSP7C_MOUSE	2.0567e-10
MVNHFIAEFK	1	sp|P63017|HSP7C_MOUSE	4.78742e-14
MVNHFIAEFKR	1	sp|P63017|HSP7C_MOUSE	5.21414e-13
MVQEAEKYKAEDEKQR	1	sp|P63017|HSP7C_MOUSE	1.90811e-19
VC+57.021NPIITK	1	sp|P63017|HSP7C_MOUSE	7.23442e-11
TIVITSHPGQIVK	2	sp|P63037|DNJA1_MOUSE	3.68062e-11
HYNGEAYEDDEHHPR	1	sp|P63037|DNJA1_MOUSE	1.47238e-10
LVQDVANNTNEEAGDGTTTATVLAR	5	sp|P63038|CH60_MOUSE	5.05655e-26
AAVEEGIVLGGGC+57.021ALLR	3	sp|P63038|CH60_MOUSE	2.96984e-16
LSDGVAVLK	2	sp|P63038|CH60_MOUSE	9.09235e-12
GIIDPTKVVR	1	sp|P63038|CH60_MOUSE	8.54748e-13
GVMLAVDAVIAELKK	1	sp|P63038|CH60_MOUSE	9.40806e-14
GYISPYFINTSK	1	sp|P63038|CH60_MOUSE	6.80101e-16
IQEITEQLDITTSEYEKEKLNER	1	sp|P63038|CH60_MOUSE	1.04499e-24
ISKGANPVEIR	1	sp|P63038|CH60_MOUSE	1.12222e-12
KDRVTDALNATR	1	sp|P63038|CH60_MOUSE	1.22457e-10
NAGVEGSLIVEK	1	sp|P63038|CH60_MOUSE	2.18154e-15
NQLKDMAIATGGAVFGEEGLNLNLEDVQAHDLGK	1	sp|P63038|CH60_MOUSE	1.79972e-20
TLNDELEIIEGMKFDR	1	sp|P63038|CH60_MOUSE	1.4573e-12
TVIIEQSWGSPK	1	sp|P63038|CH60_MOUSE	6.4401e-15
VGEVIVTKDDAMLLK	1	sp|P63038|CH60_MOUSE	2.1502e-19
VGGTSDVEVNEKKDRVTDALNATR	1	sp|P63038|CH60_MOUSE	4.15031e-16
VGLQVVAVK	1	sp|P63038|CH60_MOUSE	2.73902e-12
FLIPNASQPESK	1	sp|P63101|1433Z_MOUSE	2.48248e-14
VC+57.021EEIAIIPSKK	2	sp|P63276|RS17_MOUSE	1.00358e-12
TALIHDGLAR	1	sp|P63323|RS12_MOUSE	6.86395e-11
AEAGAGSATEFQFR	1	sp|P63325|RS10_MOUSE	2.58859e-15
SAVPPGADKKAEAGAGSATEFQFR	1	sp|P63325|RS10_MOUSE	1.5444e-16
IYTSIGEDYDER	1	sp|P67778|PHB_MOUSE	6.72108e-14
ITVTSEVPFSKR	3	sp|P67984|RL22_MOUSE	6.49565e-16
AGNLGGGVVTIER	2	sp|P67984|RL22_MOUSE	1.92831e-14
VVANSKESYELR	2	sp|P67984|RL22_MOUSE	4.67582e-16
DETNYGIPQR	1	sp|P68040|RACK1_MOUSE	1.33328e-12
VWNLANC+57.021K	1	sp|P68040|RACK1_MOUSE	1.25984e-12
DVNAAIATIK	1	sp|P68369|TBA1A_MOUSE	1.80383e-12
IMNTFSVVPSPK	1	sp|P68372|TBB4B_MOUSE	1.12935e-12
INVYYNEATGGKYVPR	1	sp|P68372|TBB4B_MOUSE	5.53325e-18
IADGYEQAAR	1	sp|P80316|TCPE_MOUSE	8.9358e-14
AVAQALEVIPR	1	sp|P80318|TCPG_MOUSE	2.24035e-13
IVLRLEC+57.021VEPNC+57.021R	1	sp|P83882|RL36A_MOUSE	1.59614e-15
LEC+57.021VEPNC+57.021R	1	sp|P83882|RL36A_MOUSE	1.65849e-10
VC+57.021MYFTYK	1	sp|P83940|ELOC_MOUSE	2.43367e-13
EVQTNDLKEVVNK	1	sp|P97351|RS3A_MOUSE	2.54043e-17
FKLITEDVQGK	1	sp|P97351|RS3A_MOUSE	1.21553e-11
LITEDVQGK	1	sp|P97351|RS3A_MOUSE	6.82297e-12
TTDGYLLR	1	sp|P97351|RS3A_MOUSE	3.15251e-11
FDDPKFEVIDKPQS	1	sp|P97450|ATP5J_MOUSE	3.11556e-13
QAVDVSPLR	1	sp|P97461|RS5_MOUSE	4.45953e-11
LHDNPALKEC+57.021IQGADTIR	10	sp|P97784|CRY1_MOUSE	6.49876e-21
LSIEYDSEPFGKER	10	sp|P97784|CRY1_MOUSE	3.68308e-18
LATEAGVEVIVR	8	sp|P97784|CRY1_MOUSE	2.53466e-15
SSAGTGLSSGKRPSQEEDAQSVGPK	7	sp|P97784|CRY1_MOUSE	3.17277e-28
FLLQC+57.021LEDLDANLR	4	sp|P97784|CRY1_MOUSE	1.31154e-17
GQPADVFPR	4	sp|P97784|CRY1_MOUSE	3.4568e-12
KAWVANFERPR	4	sp|P97784|CRY1_MOUSE	6.79951e-15
MEPLEMPADTITSDVIGK	3	sp|P97784|CRY1_MOUSE	1.25533e-21
MNANSLLASPTGLSPYLR	3	sp|P97784|CRY1_MOUSE	1.54212e-17
YIYDPWNAPEGIQK	3	sp|P97784|CRY1_MOUSE	2.08073e-18
C+57.021VYILDPWFAGSSNVGINR	2	sp|P97784|CRY1_MOUSE	1.32714e-23
EFFYTAATNNPR	2	sp|P97784|CRY1_MOUSE	5.95408e-17
FGC+57.021LSC+57.021R	2	sp|P97784|CRY1_MOUSE	8.38602e-11
FQTLVSKMEPLEMPADTITSDVIGK	2	sp|P97784|CRY1_MOUSE	1.02096e-24
GFPAKYIYDPWNAPEGIQK	2	sp|P97784|CRY1_MOUSE	1.45806e-15
GVNAVHWFRK	2	sp|P97784|CRY1_MOUSE	4.81359e-12
MKQIYQQLSR	2	sp|P97784|CRY1_MOUSE	1.3348e-12
RPSQEEDAQSVGPK	2	sp|P97784|CRY1_MOUSE	5.67867e-14
AWVANFERPR	1	sp|P97784|CRY1_MOUSE	8.96515e-15
C+57.021LIGVNYPKPMVNHAEASR	1	sp|P97784|CRY1_MOUSE	1.6344e-24
C+57.021MTPLSDDHDEK	1	sp|P97784|CRY1_MOUSE	2.67784e-17
EC+57.021IQGADTIR	1	sp|P97784|CRY1_MOUSE	3.07339e-13
EFFYTAATNNPRFDK	1	sp|P97784|CRY1_MOUSE	1.19261e-16
FLLQC+57.021LEDLDANLRK	1	sp|P97784|CRY1_MOUSE	1.00594e-17
HAVAC+57.021FLTR	1	sp|P97784|CRY1_MOUSE	3.04853e-12
ISHTLYDLDK	1	sp|P97784|CRY1_MOUSE	3.2882e-12
KLATEAGVEVIVR	1	sp|P97784|CRY1_MOUSE	1.80031e-10
LFVIRGQPADVFPR	1	sp|P97784|CRY1_MOUSE	3.55198e-12
QIYQQLSR	1	sp|P97784|CRY1_MOUSE	7.25013e-11
RTDPNGDYIR	1	sp|P97784|CRY1_MOUSE	1.77455e-10
RTDPNGDYIRR	1	sp|P97784|CRY1_MOUSE	5.10773e-11
TDPNGDYIRR	1	sp|P97784|CRY1_MOUSE	5.81089e-11
AAAEVNQEYGLDPK	1	sp|P97807|FUMH_MOUSE	7.74344e-13
LLLGPC+57.021TPVQYR	1	sp|P97872|FMO5_MOUSE	2.46125e-15
ISVYYNEATGGK	1	sp|P99024|TBB5_MOUSE	2.324e-15
NIEDVIAQGVGK	2	sp|P99027|RLA2_MOUSE	2.5918e-15
LASVPAGGAVAVSAAPGSAAPAAGSAPAAAEEK	1	sp|P99027|RLA2_MOUSE	1.50371e-17
LLADPTGAFGK	1	sp|P99029|PRDX5_MOUSE	1.55598e-14
LSPVAEEFRDR	1	sp|Q00623|APOA1_MOUSE	3.69874e-13
GDFC+57.021IQVGR	1	sp|Q01768|NDKB_MOUSE	1.65188e-10
TFIAIKPDGVQR	1	sp|Q01768|NDKB_MOUSE	1.53271e-12
GVLFYGPPGC+57.021GK	1	sp|Q01853|TERA_MOUSE	5.9146e-13
FNSVVTNPQGHYNPSTGK	1	sp|Q02105|C1QC_MOUSE	9.4464e-17
AGDKDDITEPAVC+57.021ALR	1	sp|Q02257|PLAK_MOUSE	1.40891e-10
TMQNTSDLDTAR	1	sp|Q02257|PLAK_MOUSE	2.19298e-14
TGAIVDVPVGEELLGR	3	sp|Q03265|ATPA_MOUSE	1.12228e-13
AVDSLVPIGR	2	sp|Q03265|ATPA_MOUSE	3.58845e-12
ILGADTSVDLEETGR	2	sp|Q03265|ATPA_MOUSE	1.44753e-18
EAYPGDVFYLHSR	1	sp|Q03265|ATPA_MOUSE	1.62588e-12
HALIIYDDLSK	1	sp|Q03265|ATPA_MOUSE	2.55257e-14
NVQAEEMVEFSSGLK	1	sp|Q03265|ATPA_MOUSE	1.85059e-11
VGLKAPGIIPR	1	sp|Q03265|ATPA_MOUSE	5.62623e-11
VLSIGDGIAR	1	sp|Q03265|ATPA_MOUSE	4.86104e-12
VVDALGNAIDGKGPIGSK	1	sp|Q03265|ATPA_MOUSE	3.05156e-17
GLDGSLQTAAFLNLPSLFDSR	1	sp|Q05722|CO9A1_MOUSE	2.08617e-10
ADFAQAC+57.021QDAGVR	1	sp|Q05920|PYC_MOUSE	3.42273e-14
AEAEAQAEELSFPR	1	sp|Q05920|PYC_MOUSE	3.92517e-16
FIGPSPEVVR	1	sp|Q05920|PYC_MOUSE	1.91792e-13
HYFIEVNSR	1	sp|Q05920|PYC_MOUSE	6.96751e-11
IAEEFEVELER	1	sp|Q05920|PYC_MOUSE	3.72065e-14
SSSAPVASPNVR	1	sp|Q05920|PYC_MOUSE	6.03886e-11
VVEIAPATHLDPQLR	1	sp|Q05920|PYC_MOUSE	1.92806e-15
VVHSYEELEENYTR	1	sp|Q05920|PYC_MOUSE	2.88121e-14
ELAEAQDDSILK	1	sp|Q06185|ATP5I_MOUSE	2.50638e-14
IAAEEKKRLDELKR	1	sp|Q06185|ATP5I_MOUSE	1.99656e-10
VSTVTTHSSDSEVPSR	1	sp|Q06890|CLUS_MOUSE	3.52988e-16
ITEIYEGTSEIQR	1	sp|Q07417|ACADS_MOUSE	4.33077e-11
ELLTTMGDRFTDEEVDELYREAPIDKK	1	sp|Q3THE2|ML12B_MOUSE	1.72523e-11
GFSSGSAVVSGGSR	2	sp|Q3TTY5|K22E_MOUSE	1.52179e-15
LLRDYQELMNTK	2	sp|Q3TTY5|K22E_MOUSE	9.86249e-12
GFSSGSAVVSGGSRR	1	sp|Q3TTY5|K22E_MOUSE	6.9992e-16
VDPEIQNVK	1	sp|Q3TTY5|K22E_MOUSE	8.52573e-11
ITASGYTTGIEVDSTR	1	sp|Q3UIR3|DTX3L_MOUSE	1.4534e-10
RPVGASFSFGGK	1	sp|Q3UPL0|SC31A_MOUSE	8.63968e-13
AQYEDIAQK	3	sp|Q3UV17|K22O_MOUSE	4.21795e-12
FASFIDKVR	2	sp|Q3UV17|K22O_MOUSE	1.17117e-12
WEC+57.021PFDEK	1	sp|Q3V0Q1|DYH12_MOUSE	8.68775e-11
SGDGLSGTQKEAALR	1	sp|Q5YD48|A1CF_MOUSE	3.04878e-11
SSPYPTDVAR	1	sp|Q60597|ODO1_MOUSE	1.04701e-10
VASSVPVENFTIHGGLSR	1	sp|Q60597|ODO1_MOUSE	1.40594e-12
ALGQNPTNAEVLK	4	sp|Q60605|MYL6_MOUSE	1.13681e-16
VLGNPKSDEMNVK	3	sp|Q60605|MYL6_MOUSE	6.38408e-18
VFDKEGNGTVMGAEIR	2	sp|Q60605|MYL6_MOUSE	1.49583e-15
VLDFEHFLPMLQTVAK	2	sp|Q60605|MYL6_MOUSE	2.53299e-20
NKDQGTYEDYVEGLR	1	sp|Q60605|MYL6_MOUSE	1.07185e-13
TGDGKILYSQC+57.021GDVMR	1	sp|Q60605|MYL6_MOUSE	1.14792e-14
FGEVVDC+57.021TLK	1	sp|Q60668|HNRPD_MOUSE	3.21247e-14
AITGIQAFTVGK	1	sp|Q60759|GCDH_MOUSE	5.4758e-15
ANEELAGVVAEVQK	1	sp|Q61176|ARGI1_MOUSE	3.05884e-17
EGNHKPGTDYLKPPK	1	sp|Q61176|ARGI1_MOUSE	2.57375e-13
SLEIIGAPFSK	1	sp|Q61176|ARGI1_MOUSE	3.26447e-13
AGGIETIANEYSDR	1	sp|Q61316|HSP74_MOUSE	3.64985e-15
VLATAFDTTLGGR	1	sp|Q61316|HSP74_MOUSE	8.81374e-13
VTMQNLNDRLASYLDKVR	1	sp|Q61414|K1C15_MOUSE	9.455e-21
SC+57.021AVAEYGVYVR	1	sp|Q61646|HPT_MOUSE	2.23066e-15
DLSSSDLSTASK	1	sp|Q61838|PZP_MOUSE	6.45189e-14
GSGSGC+57.021VYLQTSLK	1	sp|Q61838|PZP_MOUSE	4.09043e-13
KFDQLLAEEK	1	sp|Q61879|MYH10_MOUSE	4.19468e-13
GPLSQAPTPAPK	1	sp|Q62523|ZYX_MOUSE	1.21529e-14
QYDISNPQKPR	1	sp|Q63836|SBP2_MOUSE	1.00419e-10
VIEASEIQAK	1	sp|Q63836|SBP2_MOUSE	2.22076e-12
IGVPAFQQR	1	sp|Q64339|ISG15_MOUSE	2.35362e-11
SGEIEPVSVK	1	sp|Q64433|CH10_MOUSE	1.02365e-12
VLQATVVAVGSGGK	1	sp|Q64433|CH10_MOUSE	3.64176e-18
KESYSVYVYK	2	sp|Q64475|H2B1B_MOUSE	2.01138e-11
ESYSVYVYK	1	sp|Q64475|H2B1B_MOUSE	2.26292e-13
LLLPGELAK	1	sp|Q64475|H2B1B_MOUSE	5.33329e-11
IYIDSNNNPER	1	sp|Q68FD5|CLH1_MOUSE	5.40345e-14
ALEEANADLEVK	2	sp|Q6IFX2|K1C42_MOUSE	5.31607e-15
TKYETELNLR	2	sp|Q6IFX2|K1C42_MOUSE	2.45933e-11
FLEQQNQVLQTK	3	sp|Q6IFZ6|K2C1B_MOUSE	2.1711e-16
NKYEDEINKR	2	sp|Q6IFZ6|K2C1B_MOUSE	5.14189e-13
FLEQQNQVLETK	7	sp|Q6IME9|K2C72_MOUSE	3.20497e-16
VAQLC+57.021DFNPK	1	sp|Q6IRU5|CLCB_MOUSE	1.01066e-13
RKRKKEREKEKRR	1	sp|Q6ZPZ3|ZC3H4_MOUSE	1.49572e-10
LIPDGC+57.021GVK	1	sp|Q6ZWV3|RL10_MOUSE	3.17298e-12
VLTVINQTQKENLR	3	sp|Q6ZWV7|RL35_MOUSE	5.64859e-18
VLTVINQTQKENLRK	1	sp|Q6ZWV7|RL35_MOUSE	7.31966e-12
VVTDTDETELAR	1	sp|Q6ZWX6|IF2A_MOUSE	6.54263e-11
DLLHPSLEEEKKK	1	sp|Q6ZWY3|RS27L_MOUSE	1.04551e-10
AQGSVALSVTQDPAR	1	sp|Q78JT3|3HAO_MOUSE	7.93816e-11
VITEYLNAQESAK	1	sp|Q78PY7|SND1_MOUSE	1.13098e-11
INVYYNEAAGNKYVPR	1	sp|Q7TMM9|TBB2A_MOUSE	2.20946e-22
RQLFRTKSKRR	1	sp|Q80UW5|MRCKG_MOUSE	3.84185e-11
AEAGDNLGALVR	1	sp|Q8BFR5|EFTU_MOUSE	2.13074e-12
FKKYEEIDNAPEER	1	sp|Q8BFR5|EFTU_MOUSE	5.80548e-11
QNYTRPRKKLSR	1	sp|Q8BGE5|FANCM_MOUSE	1.79329e-10
VRKEEREQIKTLNNKFASFIDKVR	1	sp|Q8BGZ7|K2C75_MOUSE	6.28609e-16
FLSHWDHITR	1	sp|Q8BH95|ECHM_MOUSE	8.919e-14
LVEEAIQC+57.021AEK	1	sp|Q8BH95|ECHM_MOUSE	3.30764e-13
VVDDELATR	1	sp|Q8BKZ9|ODPX_MOUSE	2.19783e-12
AAPAAAAAMAPPGPR	1	sp|Q8BMF4|ODP2_MOUSE	5.98456e-17
GIDLTQVKGTGPEGR	1	sp|Q8BMF4|ODP2_MOUSE	3.18417e-17
ILVPEGTR	1	sp|Q8BMF4|ODP2_MOUSE	1.23393e-10
TLLKDTTVTGLGR	2	sp|Q8BMS1|ECHA_MOUSE	2.41943e-15
DGPGFYTTR	1	sp|Q8BMS1|ECHA_MOUSE	2.74394e-11
FGELALTK	1	sp|Q8BMS1|ECHA_MOUSE	1.24143e-10
LPAKPEVSSDEDVQYR	1	sp|Q8BMS1|ECHA_MOUSE	4.06081e-13
VIIVVKDGPGFYTTR	1	sp|Q8BMS1|ECHA_MOUSE	2.32559e-12
AITGASLADIMAK	1	sp|Q8BP67|RL24_MOUSE	8.92908e-11
TDGKVFQFLNAK	1	sp|Q8BP67|RL24_MOUSE	1.70988e-11
VREELIDKKTENAVSR	1	sp|Q8BU30|SYIC_MOUSE	1.30564e-10
AANEAGYFNEEMAPIEVK	1	sp|Q8BWT1|THIM_MOUSE	5.06714e-12
ALDLDPSKTNVSGGAIALGHPLGGSGSR	1	sp|Q8BWT1|THIM_MOUSE	6.29669e-18
VGVPTETGALTLNR	1	sp|Q8BWT1|THIM_MOUSE	1.1735e-16
YNISREDC+57.021DRYALQSQQR	1	sp|Q8BWT1|THIM_MOUSE	1.08863e-15
AFDAIESAQSAR	1	sp|Q8BX70|VP13C_MOUSE	4.41975e-15
VAESTEEVSSLRPPR	1	sp|Q8BX70|VP13C_MOUSE	2.10012e-13
EVEMDAVGKEGR	2	sp|Q8C196|CPSM_MOUSE	1.52236e-16
GLNSDSVTEETLRK	2	sp|Q8C196|CPSM_MOUSE	2.32013e-15
GQNQPVLNITNR	2	sp|Q8C196|CPSM_MOUSE	3.10861e-14
MC+57.021HPSVDGFTPR	2	sp|Q8C196|CPSM_MOUSE	4.18913e-13
AFAISGPFNVQFLVK	1	sp|Q8C196|CPSM_MOUSE	4.32031e-17
AFAMTNQILVER	1	sp|Q8C196|CPSM_MOUSE	1.78406e-15
FVEGAREVEMDAVGKEGR	1	sp|Q8C196|CPSM_MOUSE	1.06915e-18
GLNSDSVTEETLR	1	sp|Q8C196|CPSM_MOUSE	2.83328e-16
GNDVLVIEC+57.021NLR	1	sp|Q8C196|CPSM_MOUSE	2.22128e-11
GNPTKVVAVDC+57.021GIKNNVIR	1	sp|Q8C196|CPSM_MOUSE	2.33779e-14
IMGTSPLQIDRAEDR	1	sp|Q8C196|CPSM_MOUSE	8.14566e-16
SVGEVMAIGR	1	sp|Q8C196|CPSM_MOUSE	9.50164e-13
TAVDSGIALLTNFQVTK	1	sp|Q8C196|CPSM_MOUSE	6.88167e-19
VSQEHPVVLTK	1	sp|Q8C196|CPSM_MOUSE	1.20724e-11
VVAVDC+57.021GIK	1	sp|Q8C196|CPSM_MOUSE	9.86354e-13
IDVVSENPGQTHFHTIQK	1	sp|Q8C4V4|FBXL3_MOUSE	1.99183e-20
VLVANNSDTLK	1	sp|Q8C4V4|FBXL3_MOUSE	9.63623e-15
FVRLPVADSEAC+57.021QR	1	sp|Q8CG16|C1RA_MOUSE	1.72851e-15
ALQTTYGTNAPR	1	sp|Q8CG76|ARK72_MOUSE	9.58256e-14
ERPAPAVSSTC+57.021ATAEDSSVLYSR	1	sp|Q8CGC7|SYEP_MOUSE	7.4221e-15
VTIAQGGVLPNIQAVLLPK	1	sp|Q8CGP7|H2A1K_MOUSE	1.15641e-14
LVQGILFSC+57.021GGK	1	sp|Q8JZR0|ACSL5_MOUSE	7.79502e-11
TPC+57.021TVSC+57.021NIPVVSGKEC+57.021EEIIR	2	sp|Q8K0E8|FIBB_MOUSE	2.4279e-16
AHYGGFTVQNEASK	1	sp|Q8K0E8|FIBB_MOUSE	4.42909e-11
LYIDETVNDNIPLNLR	1	sp|Q8K0E8|FIBB_MOUSE	1.41228e-10
VGSVLQEGC+57.021EK	1	sp|Q8K2B3|SDHA_MOUSE	3.40261e-14
FADGDVDAVLSR	1	sp|Q8R0Y6|AL1L1_MOUSE	3.81226e-16
TDVAAPFGGFK	1	sp|Q8R0Y6|AL1L1_MOUSE	7.71231e-12
YC+57.021FPNYVGRPK	1	sp|Q8R5C5|ACTY_MOUSE	9.64598e-16
AAPTEPPEAPEATAAGGVTSK	1	sp|Q8VC30|TKFC_MOUSE	5.76787e-15
EGPSLTSPAQVLSR	1	sp|Q8VC30|TKFC_MOUSE	1.4345e-15
SAEAAAEATKNMEAGAGR	1	sp|Q8VC30|TKFC_MOUSE	1.59436e-18
TITVSQDEGVRPSTTMQGLAK	1	sp|Q8VCH0|THIKB_MOUSE	1.76652e-12
YLQEIYNSNNQK	2	sp|Q8VCM7|FIBG_MOUSE	4.29308e-16
AIQVYYNPDQPPKPGMIDSATQK	1	sp|Q8VCM7|FIBG_MOUSE	2.34729e-19
DNC+57.021C+57.021ILDER	1	sp|Q8VCM7|FIBG_MOUSE	3.47355e-12
ESGLYFIRPLK	1	sp|Q8VCM7|FIBG_MOUSE	4.45388e-13
TSTADYAMFR	1	sp|Q8VCM7|FIBG_MOUSE	7.65201e-15
FAAVGFHR	1	sp|Q8VCR2|DHB13_MOUSE	1.04829e-10
LTAYEFAK	1	sp|Q8VCR2|DHB13_MOUSE	1.61211e-11
SVTGQTVLITGAGHGIGR	1	sp|Q8VCR2|DHB13_MOUSE	1.04964e-11
ALEEAMEQKAELER	2	sp|Q8VDD5|MYH9_MOUSE	5.10087e-18
QLEEAEEEAQRANASR	2	sp|Q8VDD5|MYH9_MOUSE	5.48363e-14
AKQTLENERGELANEVK	1	sp|Q8VDD5|MYH9_MOUSE	2.95294e-11
ALELDSNLYR	1	sp|Q8VDD5|MYH9_MOUSE	1.21414e-10
ASIAALEAK	1	sp|Q8VDD5|MYH9_MOUSE	1.87325e-11
ASREEILAQAKENEK	1	sp|Q8VDD5|MYH9_MOUSE	4.19615e-12
KLVWVPSSK	1	sp|Q8VDD5|MYH9_MOUSE	3.00363e-11
QLEEAEEEAQR	1	sp|Q8VDD5|MYH9_MOUSE	2.16618e-13
TLEDEAKTHEAQIQEMR	1	sp|Q8VDD5|MYH9_MOUSE	1.563e-10
VAEFTTNLMEEEEKSK	1	sp|Q8VDD5|MYH9_MOUSE	1.87313e-17
YKASIAALEAK	1	sp|Q8VDD5|MYH9_MOUSE	8.56887e-13
KAVVVC+57.021PKDEDYKQR	1	sp|Q8VEK3|HNRPU_MOUSE	3.7375e-11
YIC+57.021TTSAIQNR	1	sp|Q91V92|ACLY_MOUSE	4.60826e-11
ILQDIASGR	1	sp|Q91VD9|NDUS1_MOUSE	1.69091e-11
GLC+57.021GAIHSSVAK	1	sp|Q91VR2|ATPG_MOUSE	1.00617e-12
VYGTGSLALYEK	1	sp|Q91VR2|ATPG_MOUSE	5.24478e-16
ITNKVFANPEDC+57.021AGFGKGENAK	2	sp|Q91VS7|MGST1_MOUSE	5.12875e-12
ITNKVFANPEDC+57.021AGFGKGENAKK	1	sp|Q91VS7|MGST1_MOUSE	6.81413e-13
VFANPEDC+57.021AGFGKGENAKK	1	sp|Q91VS7|MGST1_MOUSE	5.00985e-15
FNPVTGEVPPRYPLDAR	1	sp|Q91X72|HEMO_MOUSE	5.93605e-13
GGNNLVSGYPK	1	sp|Q91X72|HEMO_MOUSE	4.04029e-11
YLDEDTVYHLQPSGR	3	sp|Q91X83|METK1_MOUSE	7.73589e-20
FVIGGPQGDAGVTGR	2	sp|Q91X83|METK1_MOUSE	7.52571e-20
DTIKHIGYDDSAK	1	sp|Q91X83|METK1_MOUSE	2.01677e-12
FVIGGPQGDAGVTGRK	1	sp|Q91X83|METK1_MOUSE	1.26603e-17
HIGYDDSAKGFDFK	1	sp|Q91X83|METK1_MOUSE	3.90575e-18
TQVTVQYMQDNGAVIPVR	1	sp|Q91X83|METK1_MOUSE	1.1914e-19
VVRDTIKHIGYDDSAK	1	sp|Q91X83|METK1_MOUSE	8.53042e-13
ISSLLQEAK	1	sp|Q91XD4|FTCD_MOUSE	3.27684e-11
IADQC+57.021PSSLAIQENANALAR	3	sp|Q91Y97|ALDOB_MOUSE	7.48182e-17
GILAADESVGTMGNR	2	sp|Q91Y97|ALDOB_MOUSE	8.89935e-19
LDQGGAPLAGTNKETTIQGLDGLSER	2	sp|Q91Y97|ALDOB_MOUSE	2.48527e-20
VTAEVVLVHPGGGSTSR	1	sp|Q91YQ5|RPN1_MOUSE	1.04798e-12
YDYQRQPDSGISSIR	1	sp|Q91YQ5|RPN1_MOUSE	1.67764e-14
SFENSLGINVPR	1	sp|Q91ZJ5|UGPA_MOUSE	4.42376e-12
TTLLAGDIEHPR	1	sp|Q91ZX7|LRP1_MOUSE	4.11379e-12
MSFLFSSR	1	sp|Q921Y0|MOB1A_MOUSE	2.12755e-10
FGAPPHAGGGIGLER	1	sp|Q922B2|SYDC_MOUSE	1.10259e-10
VVGDVAYDEAKER	1	sp|Q922D8|C1TC_MOUSE	2.38041e-12
TTAENEFVMLKK	1	sp|Q922U2|K2C5_MOUSE	1.74512e-16
YEELQQTAGR	1	sp|Q922U2|K2C5_MOUSE	6.37794e-11
VLVDVSNNR	1	sp|Q923B6|STEA4_MOUSE	2.95893e-12
VYRIEGDETSTEAATR	1	sp|Q923G2|RPAB3_MOUSE	1.03409e-10
VYGTVLSR	1	sp|Q99K67|AASS_MOUSE	7.00867e-11
IASPEGQDYLK	1	sp|Q99LF4|RTCB_MOUSE	1.21775e-10
PC+57.021AENEFVTLKK	1	sp|Q99M74|KRT82_MOUSE	5.86089e-13
ASMVQSQEAPKQDAPAK	1	sp|Q99PL5|RRBP1_MOUSE	3.44183e-15
TVSLNNLSADEVTR	1	sp|Q9CQ75|NDUA2_MOUSE	3.16137e-18
LQDPFSVYR	1	sp|Q9CQA3|SDHB_MOUSE	2.09954e-10
GVVDSEDIPLNLSR	1	sp|Q9CQN1|TRAP1_MOUSE	1.6247e-13
TYGIC+57.021GAIR	1	sp|Q9CQR2|RS21_MOUSE	1.15487e-12
TLAFASVDLTNKTTGK	5	sp|Q9CQR4|ACO13_MOUSE	1.76311e-20
TLAFASVDLTNK	4	sp|Q9CQR4|ACO13_MOUSE	5.95665e-16
GAPGVSVDMNITYMSPAK	1	sp|Q9CQR4|ACO13_MOUSE	3.18514e-13
LIC+57.021EMKVEEQHTNK	1	sp|Q9CQR4|ACO13_MOUSE	3.73558e-18
VLEKVTLVSAAPEK	1	sp|Q9CQR4|ACO13_MOUSE	1.98963e-16
VTLVSAAPEK	1	sp|Q9CQR4|ACO13_MOUSE	3.39284e-13
SGPFAPVLSATSR	1	sp|Q9CR68|UCRI_MOUSE	3.17954e-11
TSYTNLDGR	1	sp|Q9CRB3|HIUH_MOUSE	6.71725e-13
TAVC+57.021DIPPR	3	sp|Q9CWF2|TBB2B_MOUSE	8.68925e-13
NMMAAC+57.021DPR	1	sp|Q9CWF2|TBB2B_MOUSE	5.75339e-12
TAVC+57.021DIPPRGLK	1	sp|Q9CWF2|TBB2B_MOUSE	1.89857e-11
VLEQLTGQTPVFSK	3	sp|Q9CXW4|RL11_MOUSE	1.06002e-15
YDGIILPGK	1	sp|Q9CXW4|RL11_MOUSE	6.25767e-12
ASMQQQQQLASAR	1	sp|Q9CY57|CHTOP_MOUSE	9.90322e-11
SKSEEAHAEDSVMDHHFR	1	sp|Q9CY58|PAIRB_MOUSE	4.94769e-11
NALVSHLDGTTPVC+57.021EDIGR	1	sp|Q9CZ13|QCR1_MOUSE	1.9732e-14
TDLTDYLNR	1	sp|Q9CZ13|QCR1_MOUSE	8.55712e-13
SLQSVAEER	2	sp|Q9CZM2|RL15_MOUSE	2.40478e-11
PGVTVKDVNQQEFVR	2	sp|Q9CZX8|RS19_MOUSE	2.54285e-11
DLDRIAGQVAAANKKH	1	sp|Q9CZX8|RS19_MOUSE	2.03991e-14
MVEKDQDGGRKLTPQGQR	1	sp|Q9CZX8|RS19_MOUSE	3.24284e-12
EGIEC+57.021EVINLR	1	sp|Q9D051|ODPB_MOUSE	3.1004e-13
IMEGPAFNFLDAPAVR	1	sp|Q9D051|ODPB_MOUSE	1.13518e-17
VLEDNSVPQVK	1	sp|Q9D051|ODPB_MOUSE	7.89943e-14
VVSPWNSEDAK	1	sp|Q9D051|ODPB_MOUSE	1.70673e-15
FGSGMNMGR	1	sp|Q9D0E1|HNRPM_MOUSE	9.54886e-12
RAPAAQPPAAAAPSAVGSPAAAPR	1	sp|Q9D1L0|CHCH2_MOUSE	3.14472e-11
EAVTFLRK	1	sp|Q9D2G2|ODO2_MOUSE	3.0292e-11
NVETMNYADIER	1	sp|Q9D2G2|ODO2_MOUSE	2.03052e-16
LEEKTNQMAATIKQLEQRLRQAER	1	sp|Q9D394-2|RUFY3_MOUSE	1.31696e-10
AQSELSGAADEAAR	1	sp|Q9D3D9|ATPD_MOUSE	3.72003e-17
IEANEALVK	1	sp|Q9D3D9|ATPD_MOUSE	7.04384e-12
AAPFTLEYR	2	sp|Q9D819|IPYR_MOUSE	1.00417e-12
SGQGAFGNMC+57.021R	1	sp|Q9D8E6|RL4_MOUSE	1.47609e-14
VKKLEAAATALATKSEK	1	sp|Q9D8E6|RL4_MOUSE	5.05321e-14
ALIAAQYSGAQVR	1	sp|Q9D8N0|EF1G_MOUSE	1.75219e-13
KLDPGSEETQTLVR	1	sp|Q9D8N0|EF1G_MOUSE	1.93524e-13
VTGGIFSVTK	1	sp|Q9DAM7|TM263_MOUSE	1.24779e-13
IIKVLQGC+57.021ADC+57.021LPQDIAELK	1	sp|Q9DB00|GON4L_MOUSE	1.29838e-10
TIQGDEEDLR	1	sp|Q9DB05|SNAA_MOUSE	3.64716e-13
KLDQVEKELLR	1	sp|Q9DB20|ATPO_MOUSE	8.27961e-14
LVRPPVQVYGIEGR	1	sp|Q9DB20|ATPO_MOUSE	1.48527e-16
YATALYSAASK	1	sp|Q9DB20|ATPO_MOUSE	5.8385e-15
YATALYSAASKEK	1	sp|Q9DB20|ATPO_MOUSE	2.37843e-17
RGNNTTSLLSQSVAK	1	sp|Q9DB77|QCR2_MOUSE	6.45481e-12
VIGLSSDLQQVGGASAR	1	sp|Q9DCH4|EIF3F_MOUSE	1.5397e-10
YAYYDTER	1	sp|Q9DCH4|EIF3F_MOUSE	7.16507e-12
LIDKEVISPDTR	1	sp|Q9DCN2|NB5R3_MOUSE	5.94476e-13
LIDKEVISPDTRR	1	sp|Q9DCN2|NB5R3_MOUSE	3.64338e-11
AGDLGVDLTSK	1	sp|Q9DCW4|ETFB_MOUSE	1.35048e-12
EIDGGLETLR	1	sp|Q9DCW4|ETFB_MOUSE	1.4338e-12
SAGVKVETTEDLVAK	1	sp|Q9DCW4|ETFB_MOUSE	1.78344e-17
IQEYEKQLEK	1	sp|Q9DCX2|ATP5H_MOUSE	1.69788e-13
SMAENRHLQYER	1	sp|Q9DD20|MET7B_MOUSE	3.16756e-12
AQLELEVSK	1	sp|Q9EQK5|MVP_MOUSE	6.28502e-11
HYC+57.021IVANPVSR	1	sp|Q9EQK5|MVP_MOUSE	9.30127e-11
LVEVNLNNIK	1	sp|Q9JHJ0|TMOD3_MOUSE	2.2265e-13
QALEHKDRDDYVPYTGEK	1	sp|Q9JHJ0|TMOD3_MOUSE	2.12994e-10
C+57.021KSKRRRRRR	1	sp|Q9JI20|RED2_MOUSE	4.71936e-11
GLEVTAYSPLGSSDR	1	sp|Q9JII6|AK1A1_MOUSE	1.49406e-11
SLGTADVHFER	1	sp|Q9JJW6|ALRF2_MOUSE	6.92147e-14
FGVPAEGR	1	sp|Q9JK92|HSPB8_MOUSE	1.80547e-11
EADSKPVSQKSPPPAEKVEVK	1	sp|Q9JLV1|BAG3_MOUSE	1.19263e-10
FRTEAAAATPQR	1	sp|Q9JLV1|BAG3_MOUSE	1.04943e-10
AINQGGLTSVAVR	1	sp|Q9QUM9|PSA6_MOUSE	2.38037e-15
LASYLDKVR	2	sp|Q9QWL7|K1C17_MOUSE	4.51289e-12
ALEEANTELEVK	1	sp|Q9QWL7|K1C17_MOUSE	6.00766e-15
MSVEADINGLRR	1	sp|Q9QWL7|K1C17_MOUSE	6.71315e-13
TIVEEVQDGKVISSR	1	sp|Q9QWL7|K1C17_MOUSE	6.21521e-18
VLDELTLAR	1	sp|Q9QWL7|K1C17_MOUSE	1.49024e-11
RAKRRKRKKEVPFWGRR	1	sp|Q9QXU7|PROK2_MOUSE	3.77073e-11
ILEVHVDKGMK	1	sp|Q9QYJ0|DNJA2_MOUSE	1.21975e-11
SGEVLVNVKEHSR	1	sp|Q9QZD9|EIF3I_MOUSE	3.13827e-16
SYSSGGEDGYVR	1	sp|Q9QZD9|EIF3I_MOUSE	1.48232e-14
VLAAC+57.021LTEKGAEELR	1	sp|Q9R092|H17B6_MOUSE	1.57344e-15
GLETTATYDPK	1	sp|Q9R0H0|ACOX1_MOUSE	2.67219e-14
TAAAVAAQSGILDR	1	sp|Q9R112|SQRD_MOUSE	2.33456e-14
GLLDVTC+57.021K	1	sp|Q9WTX5|SKP1_MOUSE	8.59279e-11
VIQWC+57.021THHKDDPPPPEDDENKEK	1	sp|Q9WTX5|SKP1_MOUSE	7.36302e-13
LYAVNAEEC+57.021TTLQAR	1	sp|Q9WUR2|ECI2_MOUSE	5.92483e-11
LSEENRHLRDEGLR	1	sp|Q9WV55|VAPA_MOUSE	2.80734e-12
EVKPEEVTC+57.021SEHC+57.021LQKYLK	1	sp|Q9WV98|TIM9_MOUSE	1.15501e-11
KKYQRTNQELEKFK	2	sp|Q9WVM1|RGAP1_MOUSE	2.67275e-11
FGEVVDC+57.021TIK	1	sp|Q9Z130|HNRDL_MOUSE	3.21247e-14
LSNNYYC+57.021TR	1	sp|Q9Z1P6|NDUA7_MOUSE	7.96807e-14
ITPAHDQNDYEVGQR	1	sp|Q9Z1Q9|SYVC_MOUSE	4.82889e-11
FSPDGELYASGSEDGTLR	1	sp|Q9Z1Z2|STRAP_MOUSE	1.87975e-10
FFVANTAK	1	sp|Q9Z2I8|SUCB2_MOUSE	4.63539e-12
LSEIVTLAK	2	sp|Q9Z2I9|SUCB1_MOUSE	2.59654e-11
IC+57.021NQVLVC+57.021ER	1	sp|Q9Z2I9|SUCB1_MOUSE	3.59902e-11
IVFSPEEAK	1	sp|Q9Z2I9|SUCB1_MOUSE	6.71414e-11
ASLENSLEETKGR	2	sp|Q9Z2K1|K1C16_MOUSE	1.70406e-16
ASLENSLEETK	1	sp|Q9Z2K1|K1C16_MOUSE	2.95446e-12
HSGPNSADSANDGFVR	1	sp|Q9Z2X1|HNRPF_MOUSE	2.61413e-15
